# Supplementary material for: Two-ring chirality generated by the alignment of two achiral phenylacetylene macrocycles
Source: Royal Society of Chemistry journal article supplement (doi:10.1039/d3ra01780j), 2023-01-01
Supplement: d3ra01780j1.pdf [file d3ra01780j1.pdf]

## Supplementary Information

### Two-ring chirality generated by the alignment of two achiral phenylacetylene macrocycles

Ryo Katoono\* and Kohei Arisawa

*Department of Chemistry, Faculty of Science, Hokkaido University*

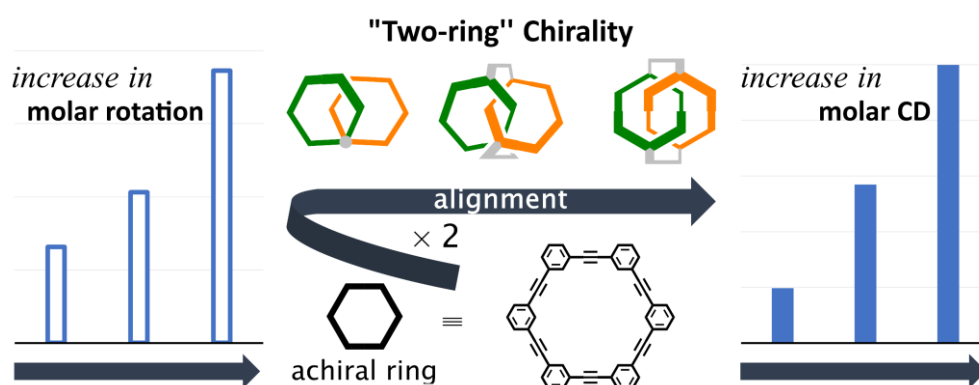

#### Contents

Supplementary Figures (**Figures S1-S3**)

S2-S7

Experimental (**Schemes S1-S3**)

S8-S20

References

S20

Copies of  $^1\text{H}/^{13}\text{C}$  NMR and MS spectra of new compounds

S21-S48

## Supplementary Figures

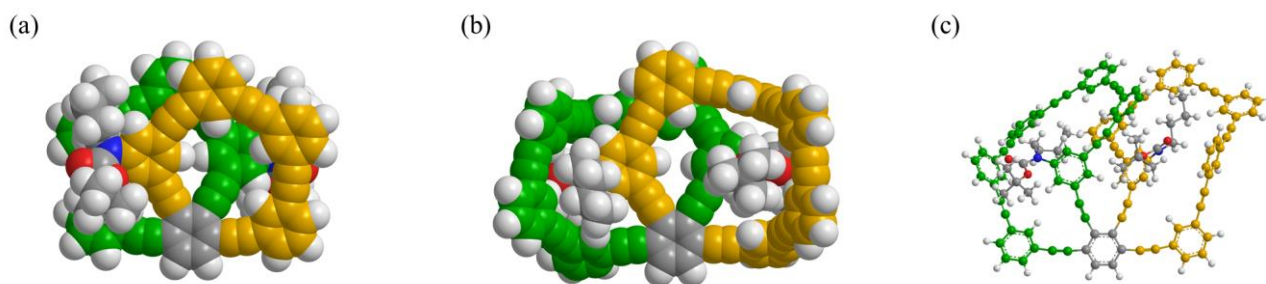

**Fig. S1** The lowest energy structures for (a) (*M*)-**3** (9PAM), (b) (*M*)-**5** (13PAM) (rel. 0 kJ mol<sup>-1</sup>) (space-filling representation), and (c) **11** (13PAM) (+34.6 kJ mol<sup>-1</sup>) (ball and stick representation), obtained by conformational searches using MacroModel software (v11.8 OPLS3e, Monte Carlo Multiple Minimum method, non-solvated, 10 000 steps). Only one enantiomer is depicted for two-ring chiral **3** and **5**.

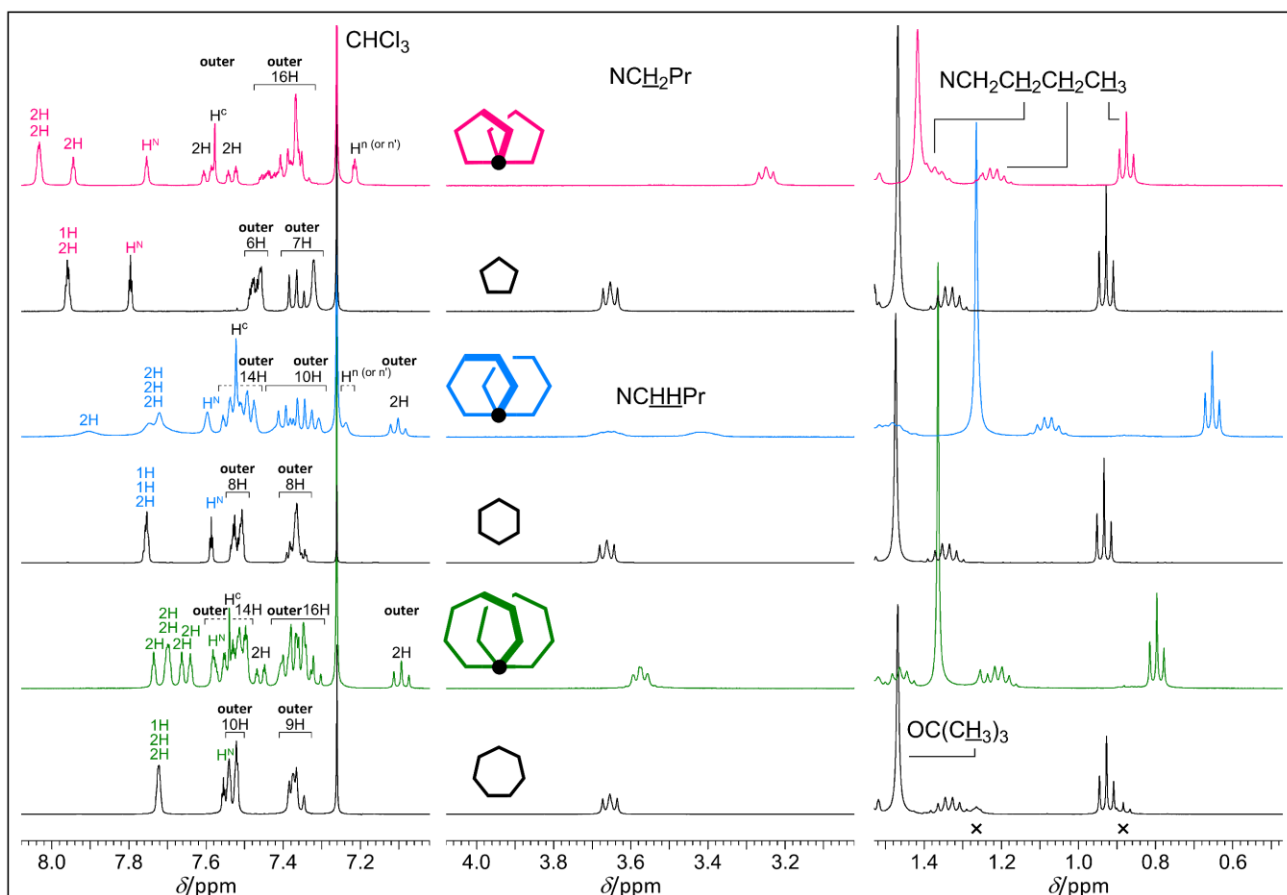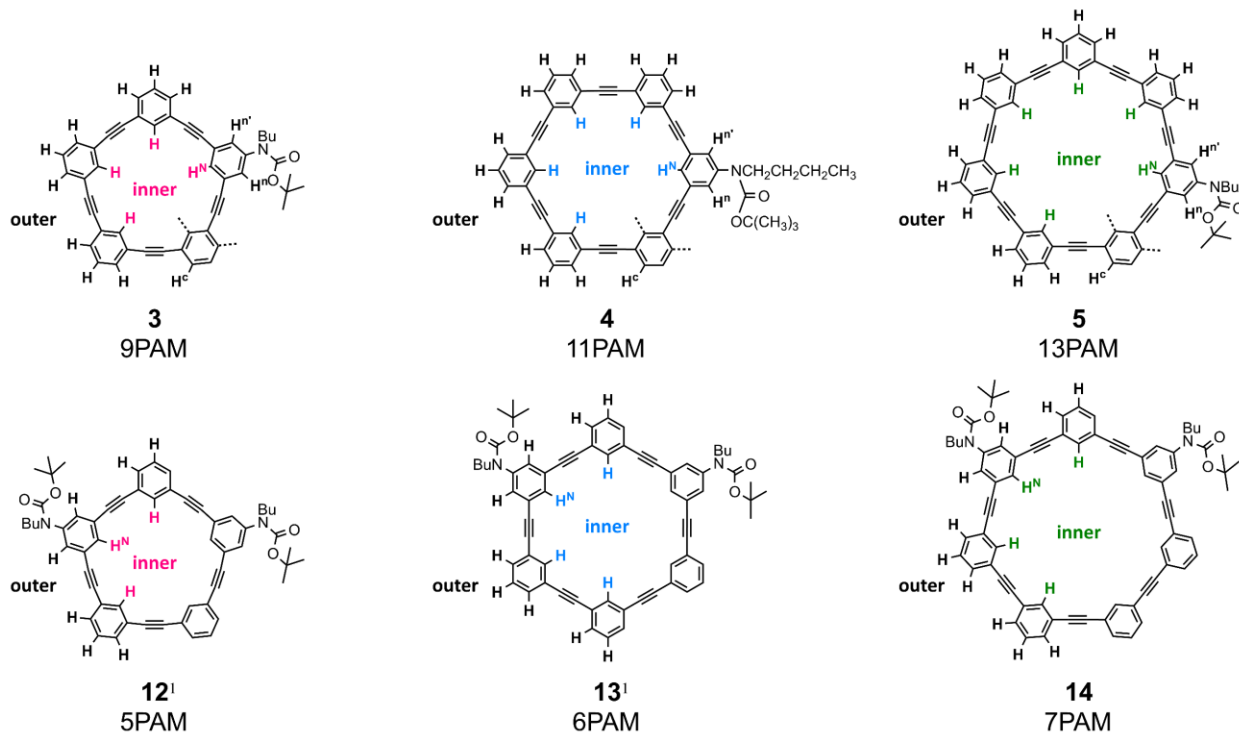

**Fig. S2A** Partial  $^1\text{H}$  NMR spectra (400 MHz; left: aromatic protons, middle: methylene protons, closest to the nitrogen atom, and right: aliphatic protons) of *rac*-**3** (9PAM), **12** (5PAM), *rac*-**4** (11PAM), **13** (6PAM), *rac*-**5** (13PAM) and **14** (7PAM), measured in chloroform-*d* at room temperature.

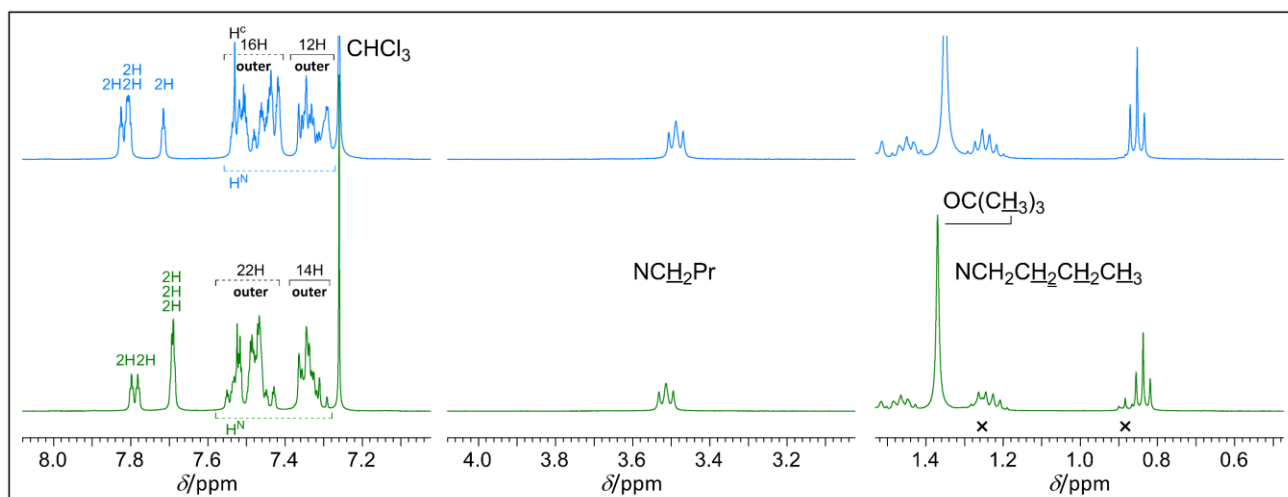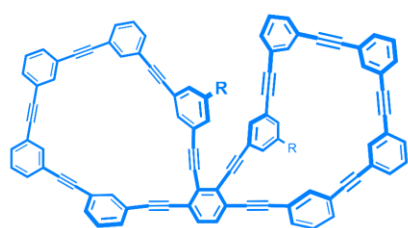

**10**  
11PAM

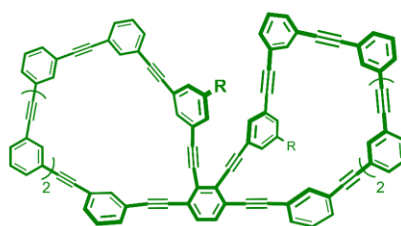

**11**  
13PAM

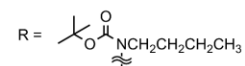

**Fig. S2B** Partial  $^1\text{H}$  NMR spectra (400 MHz; left: aromatic protons, middle: methylene protons, closest to the nitrogen atom, and right: aliphatic protons) of **10** (11PAM) and **11** (13PAM), measured in chloroform-*d* at room temperature.

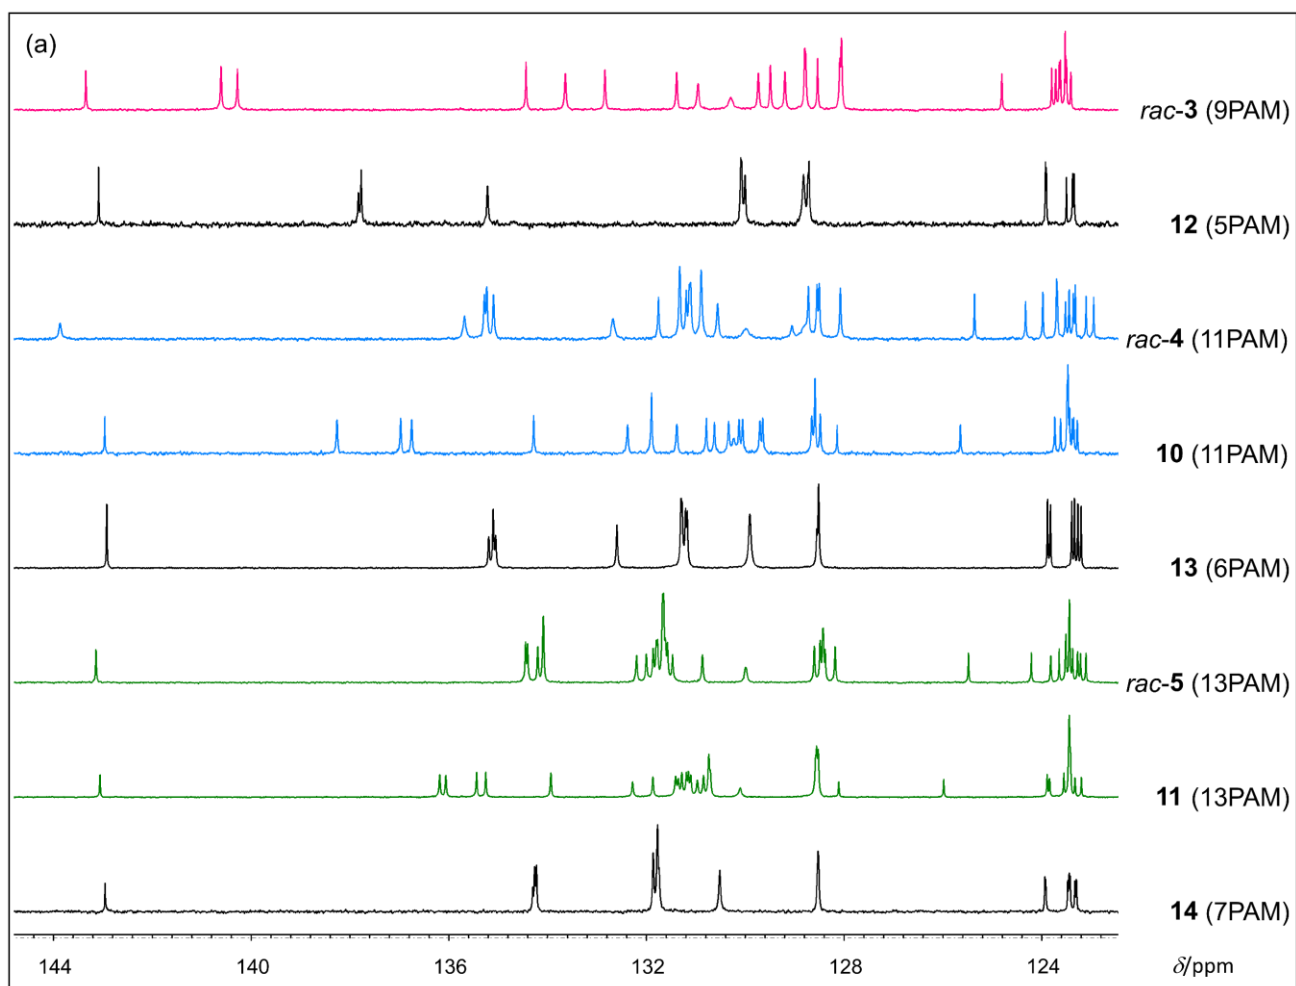

**Fig. S2C** Partial  $^{13}\text{C}$  NMR spectra [100 MHz; (a): aromatic carbons] of *rac*-**3** (9PAM), **12** (5PAM), *rac*-**4** (11PAM), **10** (11PAM), **13** (6PAM), *rac*-**5** (13PAM), **11** (13PAM) and **14** (7PAM), measured in chloroform-*d* at room temperature.

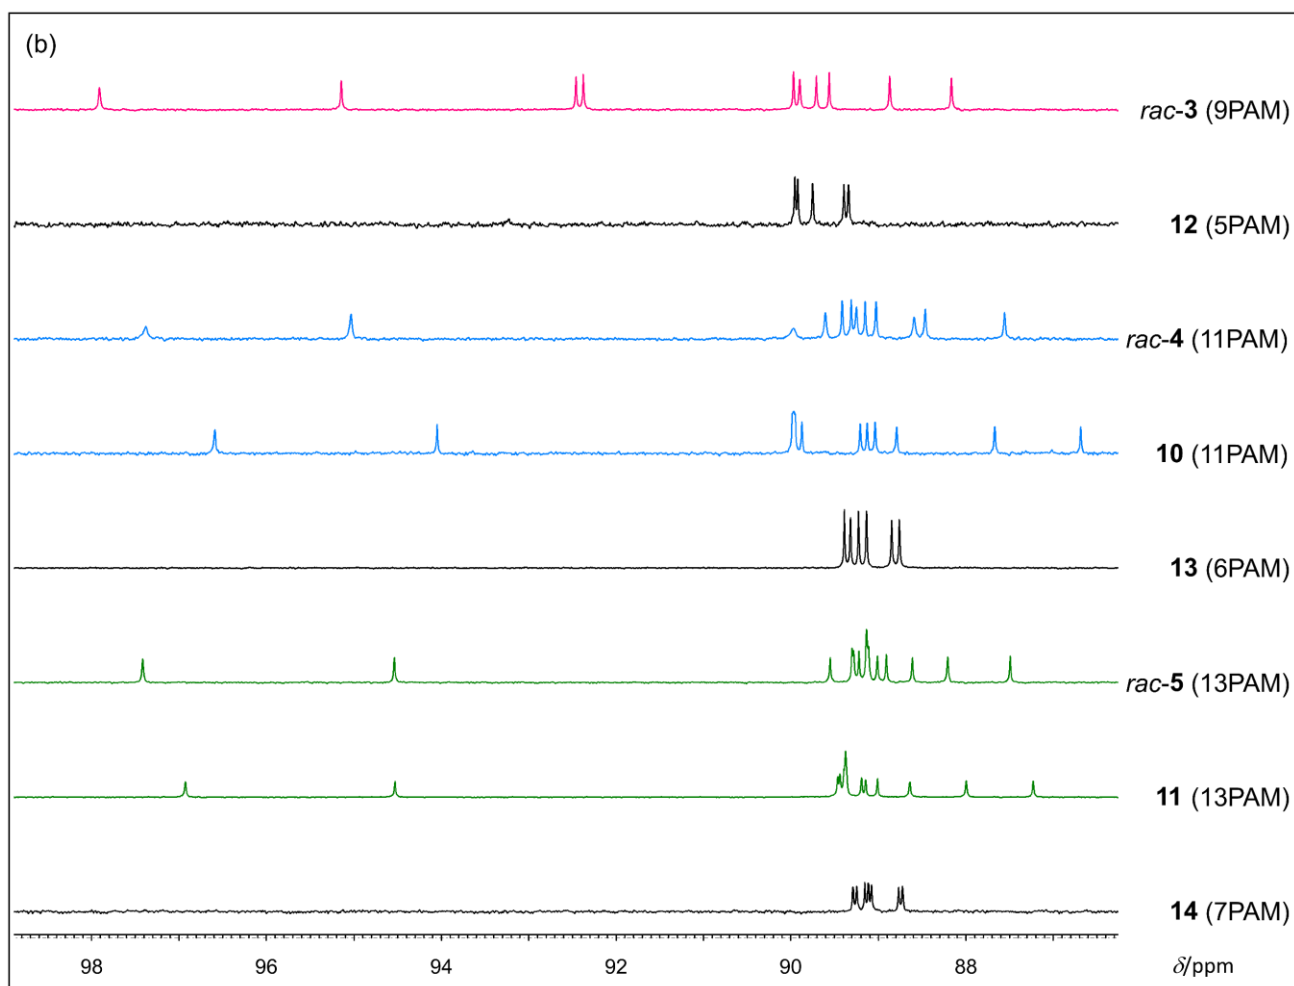

**Fig. S2C** Partial  $^{13}\text{C}$  NMR spectra [100 MHz; (b): acetylenic carbons] of *rac*-3 (9PAM), **12** (5PAM), *rac*-4 (11PAM), **10** (11PAM), **13** (6PAM), *rac*-5 (13PAM), **11** (13PAM) and **14** (7PAM), measured in chloroform-*d* at room temperature.

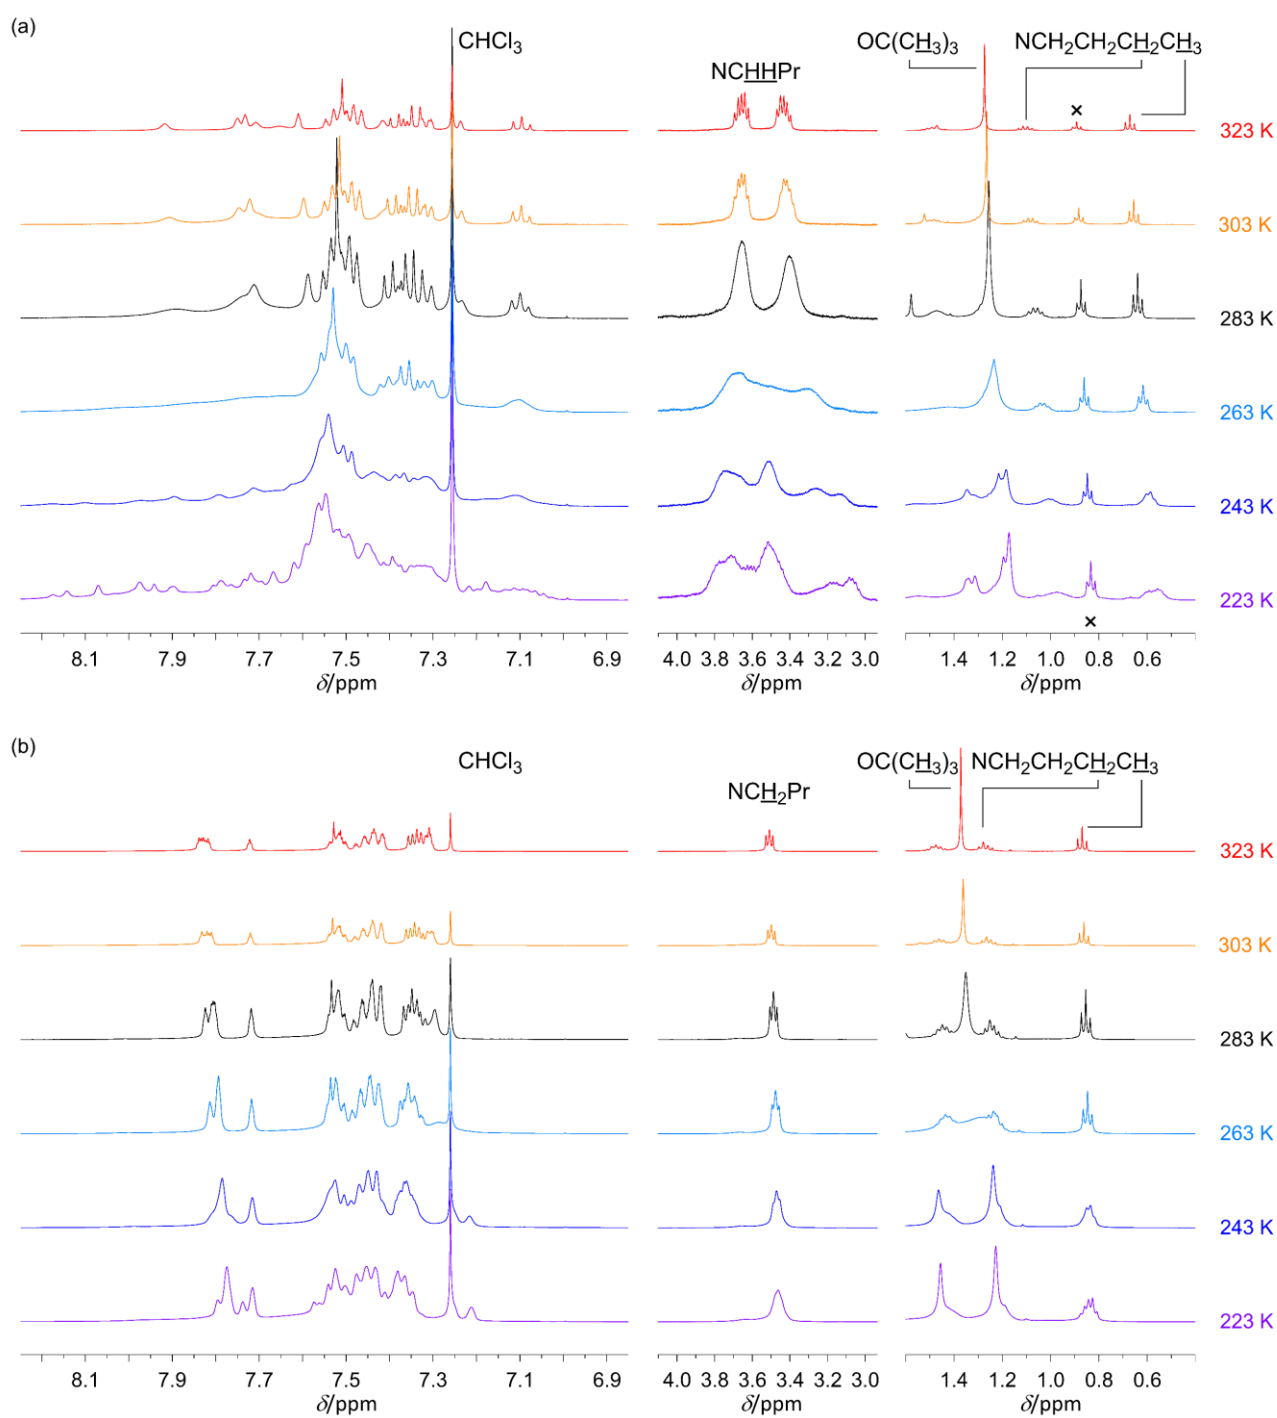

**Fig. S3** Partial VT <sup>1</sup>H NMR spectra (400 MHz; left: aromatic protons, middle: methylene protons, closest to the nitrogen atom, and right: aliphatic protons) of 11PAMs: (a) **4** and (b) **10**, measured in chloroform-*d* at 223-323 K.

## Experimental

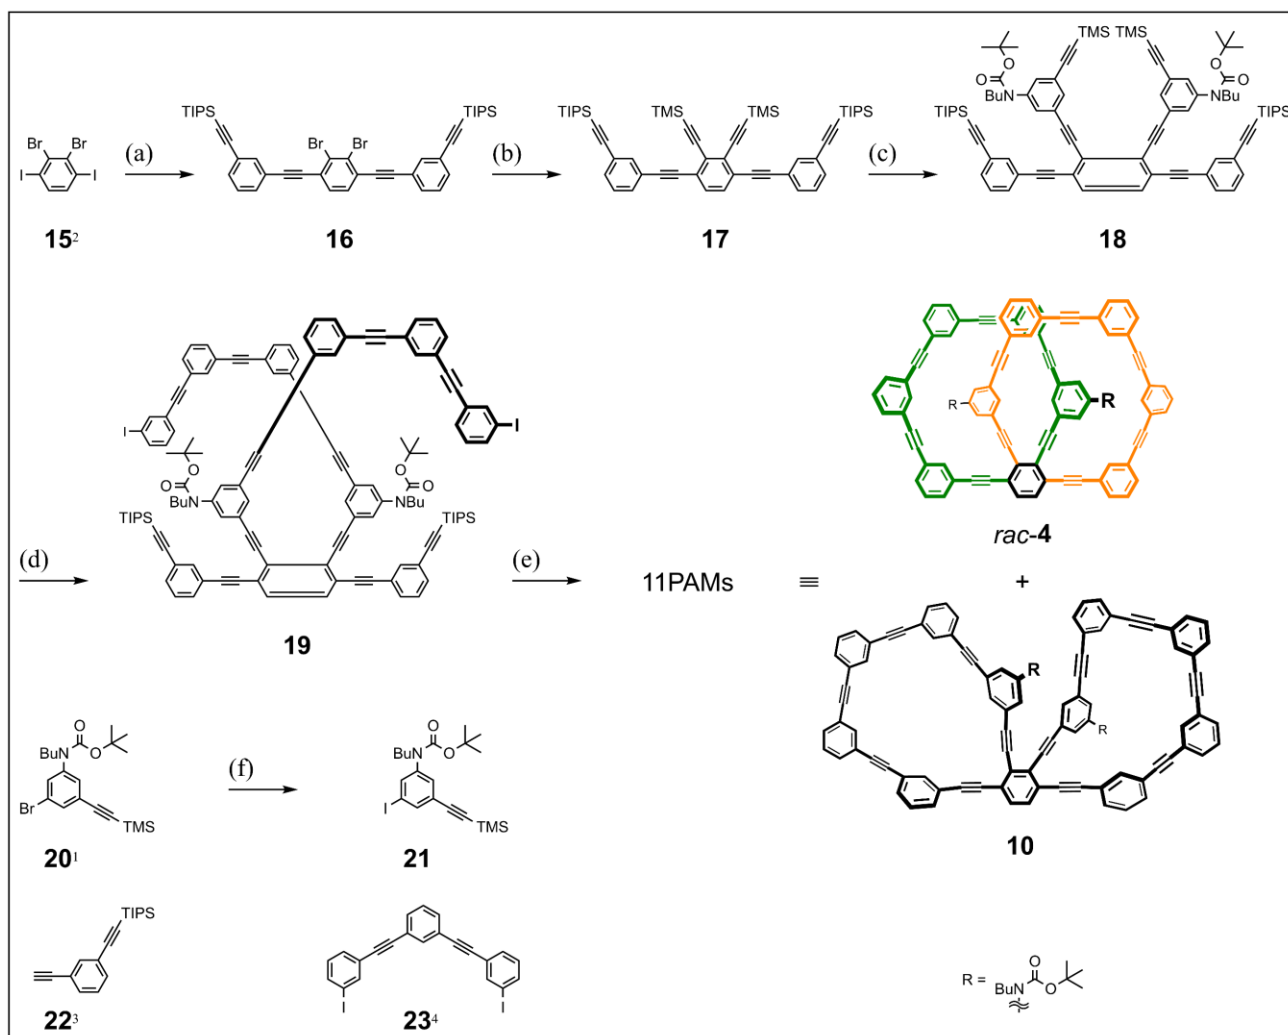

**Scheme S1.** Synthesis of 11PAMs, *rac-4* and **10**. Reagents and yields: (a) **22**, Pd(PPh<sub>3</sub>)<sub>4</sub>, CuI, Et<sub>3</sub>N (92%); (b) TMSA, Pd(PPh<sub>3</sub>)<sub>4</sub>, CuI, Et<sub>3</sub>N (80%); (c) i) K<sub>2</sub>CO<sub>3</sub>, MeOH, THF (96%), ii) **21**, Pd(PPh<sub>3</sub>)<sub>4</sub>, CuI, Et<sub>3</sub>N, THF (94%); (d) i) NaH, MeOH, THF (97%), ii) **23**, Pd(PPh<sub>3</sub>)<sub>4</sub>, CuI, Et<sub>3</sub>N, THF (52%); (e) i) tetra-*n*-butylammonium fluoride (TBAF), THF (78%), ii) Pd(PPh<sub>3</sub>)<sub>4</sub>, CuI, Et<sub>3</sub>N, THF (10% for *rac-4* and 35% for **10**); (f) *n*-BuLi, 1,2-diodoethane, diethyl ether (98%).

### Preparation of **15**<sup>2</sup> (modified procedure)

To a solution of 1,2-dibromobenzene (18.0 g, 76.3 mmol) and TMSCl (39 mL, 0.31 mol) in THF (214 mL) at  $-78$  °C was added a solution of LDA, which was prepared by <sup>i</sup>Pr<sub>2</sub>NH (44 mL, 0.31 mol) and *n*-BuLi (1.6 M in hexane, 194 mL, 305 mmol) in THF (175 mL) at  $-78$  °C and used after being warmed to room temperature, via a syringe pump (3 mL/min). The mixture was further stirred at  $-78$  °C for 17 h, quenched with aq. 1M HCl, and then diluted with hexane. The organic layer was separated, washed with brine, dried over magnesium sulfate, and then purified by column chromatography on SiO<sub>2</sub> (hexane) to give 1,4-bis(trimethylsilyl)-2,3-dibromobenzene (26.1 g) as a white solid in 90% yield.

To an ice-cooled solution of ICl (24.6 g, 151 mmol) in CH<sub>2</sub>Cl<sub>2</sub> (220 mL) was added a solution of 1,4-bis(trimethylsilyl)-2,3-dibromobenzene (26.1 g, 68.7 mmol) in CH<sub>2</sub>Cl<sub>2</sub> (54 mL), and the mixture was stirred at room temperature for 1 h, quenched with satd. aq. 1M NaHCO<sub>3</sub>, and then separated. The organic layer was washed with



aq. NaOH, water and brine, dried over magnesium sulfate, and then purified by column chromatography on SiO<sub>2</sub> (chloroform), followed by recrystallization from 2-propanol to give **15** (30.1 g) as colorless needles in 90%.

#### Preparation of **16**

To a solution of **15** (1.71 g, 3.51 mmol) and **22**<sup>3</sup> (2.02 g, 7.16 mmol) in Et<sub>3</sub>N (70 mL) were added Pd(PPh<sub>3</sub>)<sub>4</sub> (122 mg, 0.106 mmol) and CuI (40 mg, 0.21 mmol) at room temperature under an argon atmosphere, and the mixture was stirred for 4 h. After removal of a solid by filtration through a Celite pad, the filtrate was

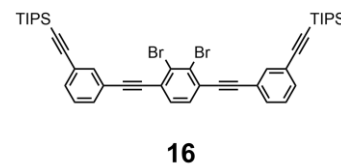

concentrated and purified by column chromatography on SiO<sub>2</sub> (hexane) to give **16** (2.58 g, 92%). **16**: elemental analyses Found: C, 66.29; H, 6.64%. Calc. for C<sub>44</sub>H<sub>52</sub>Br<sub>2</sub>Si<sub>2</sub>: C, 66.32; H, 6.58%; <sup>1</sup>H NMR δ<sub>H</sub>(400 MHz; CDCl<sub>3</sub>; Me<sub>4</sub>Si)/ppm 7.67 (2H, t, *J* = 1.2 Hz), 7.51 (2H, dt, *J* = 1.2, 7.6 Hz), 7.48 (2H, dt, *J* = 1.2, 8.0 Hz), 7.47 (2H, s), 7.32 (2H, dd, *J* = 7.6, 8.0 Hz), 1.3-1.1 (42H, br.m); <sup>13</sup>C NMR δ<sub>C</sub>(100 MHz; CDCl<sub>3</sub>)/ppm 135.0, 132.5, 131.5, 131.1, 128.7, 128.4, 126.9, 124.0, 122.6, 105.9, 95.1, 91.8, 88.8, 18.7, 11.3; FD-LRMS *m/z* 794.1 (M<sup>+</sup>, 46%), 795.1 ([M+1]<sup>+</sup>, 28), 796.1 ([M+2]<sup>+</sup>, 100), 797.1 ([M+3]<sup>+</sup>, 58), 798.1 ([M+4]<sup>+</sup>, 69), 799.1 ([M+5]<sup>+</sup>, 35), 800.1 ([M+6]<sup>+</sup>, 15).

#### Preparation of **17**

To a solution of **16** (2.00 g, 2.51 mmol), Pd(PPh<sub>3</sub>)<sub>4</sub> (147 mg, 0.127 mmol) and CuI (48 mg, 0.25 mmol) in Et<sub>3</sub>N (50 mL) was added TMSA (2.1 mL, 15 mmol) at 80 °C under an argon atmosphere, and the mixture was stirred for 6 h. After removal of a solid by filtration through a Celite pad, the filtrate was concentrated and

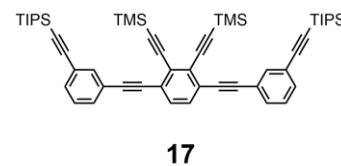

purified by column chromatography on SiO<sub>2</sub> (1:8 dichloromethane/hexane) to give **17** (1.67 g, 80%). **17**: elemental analyses Found: C, 77.88; H, 8.64%. Calc. for C<sub>54</sub>H<sub>70</sub>Si<sub>4</sub>: C, 78.00; H, 8.49%; <sup>1</sup>H NMR δ<sub>H</sub>(400 MHz; CDCl<sub>3</sub>; Me<sub>4</sub>Si)/ppm 7.67 (2H, t, *J* = 1.6 Hz), 7.48 (2H, dt, *J* = 1.6, 8.0 Hz), 7.46 (2H, dt, *J* = 1.2, 8.0 Hz), 7.42 (2H, s), 7.30 (2H, dd, *J* = 7.6, 8.0 Hz), 1.2-1.1 (42H, br.m), 0.31 (18H, s); <sup>13</sup>C NMR δ<sub>C</sub>(100 MHz; CDCl<sub>3</sub>)/ppm 135.2, 132.2, 131.4, 130.8, 128.5, 128.3, 125.8, 123.9, 123.2, 105.9, 104.0, 101.3, 94.4, 91.5, 88.4, 18.7, 11.3, 0.1; FD-LRMS *m/z* 830.5 (M<sup>+</sup>, 100%), 831.5 ([M+1]<sup>+</sup>, 78), 832.5 ([M+2]<sup>+</sup>, 47), 833.5 ([M+3]<sup>+</sup>, 19).

#### Preparation of **18**

To a solution of **17** (2.41 g, 2.89 mmol) in THF (15 mL) and MeOH (15 mL) was added K<sub>2</sub>CO<sub>3</sub> (1.18 g, 8.69 mmol) at room temperature, and the mixture was stirred at that temperature for 20 min. After addition of water, the organic layer was separated, washed with brine, dried over magnesium sulfate, and then purified by column chromatography on SiO<sub>2</sub> (1:5 dichloromethane/hexane) to give **17'** (1.91 g, 96%).

**17'**: <sup>1</sup>H NMR δ<sub>H</sub>(400 MHz; CDCl<sub>3</sub>; Me<sub>4</sub>Si)/ppm 7.67 (2H, t, *J* = 1.6 Hz), 7.51-7.49 (4H, m), 7.47 (2H, dt, *J* = 1.6, 8.0 Hz), 7.31 (2H, dd, *J* = 7.6, 8.0 Hz), 3.67 (2H, s), 1.2-1.1 (42H, br.m).

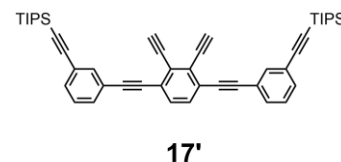

To a solution of **21** (5.24 g, 11.1 mmol), Pd(PPh<sub>3</sub>)<sub>4</sub> (321 mg, 0.278 mmol) and CuI (54 mg, 0.28 mmol) in Et<sub>3</sub>N (15 mL) was added a solution of **17'** (1.91 g, 2.78 mmol) in THF (9 mL) via a syringe pump over 75 min at 80 °C under an argon atmosphere, and the mixture was stirred at that temperature for 30 min. After removal of a solid

by filtration through a Celite pad, the filtrate was concentrated and purified by column chromatography on SiO<sub>2</sub> (1:30 ethyl acetate/hexane) to give **18** (3.59 g, 94%). **18**: <sup>1</sup>H NMR δ<sub>H</sub>(400 MHz; CDCl<sub>3</sub>; Me<sub>4</sub>Si)/ppm 7.66 (2H, t, *J* = 1.2 Hz), 7.50 (2H, s), 7.48 (2H, t, *J* = 1.6 Hz), 7.48 (2H, dt, *J* = 1.2, 8.0 Hz), 7.45 (2H, dt, *J* = 1.2, 8.0 Hz), 7.32 (2H, t, *J* = 1.6 Hz), 7.29 (2H, br.), 7.27 (2H, t, *J* = 8.0 Hz), 3.53 (4H, t, *J* = 7.6 Hz), 1.49-1.42 (4H, m), 1.39 (18H, s), 1.29-1.20 (4H, m), 1.2-

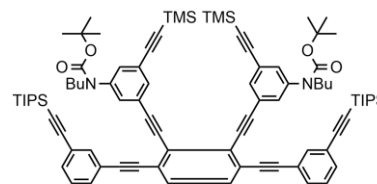

**18**

1.1 (42H, br.m), 0.85 (6H, t, *J* = 7.2 Hz), 0.23 (18H, s); <sup>13</sup>C NMR δ<sub>C</sub>(100 MHz; CDCl<sub>3</sub>)/ppm 154.1, 142.9, 134.9, 132.3, 132.2, 131.5, 131.2, 131.0, 130.0, 128.5, 127.7, 126.1, 124.1, 124.0, 123.6, 122.9, 105.9, 103.5, 96.9, 95.3, 94.8, 91.6, 88.2, 87.3, 80.4, 49.4, 30.5, 28.3, 19.8, 18.6, 13.7, 11.3, -0.1; FD-LRMS *m/z* 1372.7 (M<sup>+</sup>, 84%), 1373.7 ([M+1]<sup>+</sup>, 100), 1374.7 ([M+2]<sup>+</sup>, 72), 1375.7 ([M+3]<sup>+</sup>, 40), 1376.7 ([M+4]<sup>+</sup>, 18), 1377.7 ([M+5]<sup>+</sup>, 8).

### Preparation of **19**

To an ice-cooled solution of **18** (3.59 g, 2.61 mmol) in THF (52 mL) were added 60% NaH in oil (0.22 g, 5.5 mmol) and MeOH (1.6 mL), and the mixture was stirred at room temperature for 15 min, diluted with ethyl acetate, and then quenched with water in an ice water bath. The organic layer was separated, washed with brine, dried over magnesium sulfate, and then concentrated. The resulting solid was purified by column chromatography on SiO<sub>2</sub> (1:20 ethyl acetate/hexane) to give **18'** (3.11 g, 97%). **18'**: <sup>1</sup>H NMR δ<sub>H</sub>(400 MHz; CDCl<sub>3</sub>; Me<sub>4</sub>Si)/ppm 7.68 (2H, t, *J* = 1.6 Hz), 7.55 (2H, t, *J* = 1.6 Hz), 7.53-7.51 (4H, m), 7.47 (2H, dt, *J* = 1.2, 8.0 Hz), 7.37 (2H, t, *J* = 1.6 Hz), 7.32 (2H, br.t), 7.30 (2H, t, *J* = 7.6 Hz), 3.55 (4H, t, *J* = 7.6 Hz), 3.08 (2H, s), 1.50-1.43 (4H, m), 1.40 (18H, s), 1.30-1.20 (4H, m), 1.2-1.1 (42H, br.m), 0.86 (6H, t, *J* = 7.2 Hz).

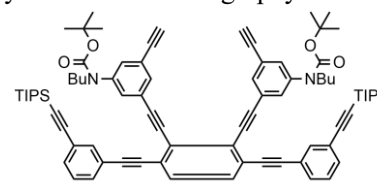

**18'**

To a solution of **23**<sup>4</sup> (886 mg, 1.67 mmol), Pd(PPh<sub>3</sub>)<sub>4</sub> (145 mg, 0.126 mmol) and CuI (48 mg, 0.25 mmol) in Et<sub>3</sub>N (38 mL) was added a solution of **18'** (257 mg, 0.209 mmol) in THF (4 mL) via a syringe pump over 6 h at 60 °C under an argon atmosphere, and the mixture was stirred at that temperature for 30 min. After removal of a solid by filtration through a Celite pad, the filtrate was concentrated and purified by column chromatography on SiO<sub>2</sub> (1:20 ethyl acetate/hexane) to give **19** (220 mg, 52%). **19**: <sup>1</sup>H NMR δ<sub>H</sub>(400 MHz; CDCl<sub>3</sub>; Me<sub>4</sub>Si)/ppm 7.89 (2H, t, *J* = 1.6 Hz), 7.74-7.65 (6H, m), 7.62 (2H, t, *J* = 1.2 Hz), 7.60 (2H, t, *J* = 1.2 Hz), 7.53 (2H, dt, *J* = 1.2, 8.0 Hz), 7.52 (2H, s), 7.51-7.43 (10H, m), 7.40 (2H, dt, *J* = 1.6, 8.0 Hz), 7.37-7.26 (10H, m), 7.08 (2H, dd, *J* = 7.6, 8.0 Hz), 3.56 (4H, t, *J* = 7.6 Hz), 1.51-1.44 (4H, m), 1.40 (18H, s), 1.29-1.19 (4H, m), 1.12 (42H, s), 0.84 (6H, t, *J* = 7.2 Hz); <sup>13</sup>C NMR δ<sub>C</sub>(100 MHz; CDCl<sub>3</sub>)/ppm 154.1, 143.1, 140.2, 137.4, 135.0, 134.7, 132.3, 132.1, 131.6, 131.5, 131.5, 131.3, 130.7, 129.9, 128.6, 128.5, 128.4, 128.0, 125.9, 125.1, 124.1, 124.1, 123.9, 123.5, 123.3, 123.2, 123.2, 123.0, 105.9, 97.1, 94.8, 93.7, 91.8, 89.8, 89.4, 89.2, 89.1, 88.7, 88.3, 88.2, 87.7, 80.5, 49.5, 30.6, 28.3, 19.9, 18.7, 13.7, 11.3; FD-LRMS *m/z* 1016.3 (M<sup>2+</sup>, 77%), 1016.9 ([M+1]<sup>2+</sup>, 100), 1017.4 ([M+2]<sup>2+</sup>, 90), 1017.8 ([M+3]<sup>2+</sup>, 65), 1018.3 ([M+4]<sup>2+</sup>, 36), 2032.7 (M<sup>+</sup>, 59), 2033.7 ([M+1]<sup>+</sup>, 95), 2034.7 ([M+2]<sup>+</sup>, 78), 2035.7 ([M+3]<sup>+</sup>, 44), 2036.7 ([M+4]<sup>+</sup>, 19); FD-HRMS Found: 2032.67316, Calc. for C<sub>126</sub>H<sub>118</sub>I<sub>2</sub>N<sub>2</sub>O<sub>4</sub>Si<sub>2</sub>: 2032.67194.

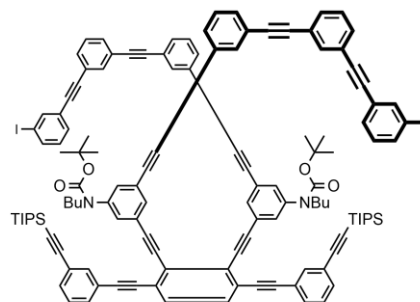

**19**

### Preparation of 11PAMs (+)-**4**, (-)-**4** and **10**

To a solution of **19** (502 mg, 0.247 mmol) in THF (15 mL) was added TBAF (1 M in THF, 0.52 mL, 0.52 mmol) at room temperature, and the mixture was stirred at that temperature for 15 min. After dilution with dichloromethane and water, the organic layer was separated, washed with brine, dried over magnesium sulfate, and then concentrated. The resulting solid was purified by column chromatography on SiO<sub>2</sub> (1:4 ethyl acetate/hexane) to give **7** (330 mg, 78%).

**7**: <sup>1</sup>H NMR δ<sub>H</sub>(400 MHz; CDCl<sub>3</sub>; Me<sub>4</sub>Si)/ppm 7.89 (2H, t, *J* = 1.6 Hz), 7.72-7.66 (6H, m), 7.62 (2H, t, *J* = 1.6 Hz), 7.61 (2H, t, *J* = 1.2 Hz), 7.57 (2H, dt, *J* = 1.2, 7.6 Hz), 7.52 (2H, s), 7.51-7.45 (10H, m), 7.42 (2H, dt, *J* = 1.2, 8.0 Hz), 7.40-7.27 (10H, m), 7.08 (2H, t, *J* = 8.0 Hz), 3.58 (4H, t, *J* = 7.6 Hz), 3.07 (2H, s), 1.53-1.45 (4H, m), 1.41 (18H, s), 1.30-1.20 (4H, m), 0.84 (6H, t, *J* = 7.2 Hz).

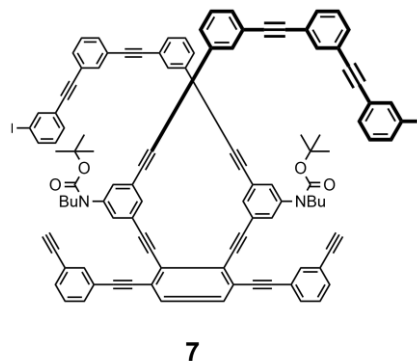

To a solution of Pd(PPh<sub>3</sub>)<sub>4</sub> and CuI in Et<sub>3</sub>N was added a solution of **7** in THF via a syringe pump over hours at 75 °C under an argon atmosphere [The reactions were implemented in two batches. The crude products were combined and purified at once]. After removal of the solvents by evaporation, the residue was dissolved in dichloromethane, which was washed with brine, dried over magnesium sulfate, and then purified by column chromatography on SiO<sub>2</sub> (1:2 ethyl acetate/hexane) to give *rac*-**4** (29 mg, 10%) and **10** (98 mg, 35%). Each product was further purified by GPC (chloroform; JAIGEL-2H & 2.5H, Japan Analytical Industry Co., Ltd., Japan), followed by HPLC separation with a standard normal-phase column (7:3 dichloromethane/hexane cont. 0.1vol% ethanol; YMC-Pack SIL, SIL-06, YMC Co., Ltd., Japan) to give a white solid, respectively. (+)-**4** and (-)-**4** were isolated in this order by HPLC separation with a chiral stationary column (3:7 chloroform/hexane; CHIRALPAK IA, DAICEL Co., Japan).

|   | <b>7</b> (total)       | Pd(PPh <sub>3</sub> ) <sub>4</sub> | CuI                  | Et <sub>3</sub> N | time |
|---|------------------------|------------------------------------|----------------------|-------------------|------|
| 1 | 330 mg<br>(0.192 mmol) | 133 mg<br>(0.115 mmol)             | 22 mg<br>(0.12 mmol) | 58 mL             | 19 h |
| 2 | /58 mL THF             | 133 mg<br>(0.115 mmol)             | 22 mg<br>(0.12 mmol) | 58 mL             | 20 h |

*rac*-**4**: IR (neat) ν<sub>max</sub>/cm<sup>-1</sup> 3062, 2959, 2929, 2871, 2210, 1701, 1595, 1583, 1482, 1367, 1146, 891, 789, 682; <sup>1</sup>H NMR δ<sub>H</sub>(400 MHz; CDCl<sub>3</sub>; Me<sub>4</sub>Si)/ppm 7.90 (2H, br.s), 7.80-7.66 (6H, br.m), 7.60 (2H, br.s), 7.56-7.45 (14H, m), 7.52 (2H, s), 7.45-7.29 (10H, m), 7.26-7.21 (2H, br.m), 7.10 (2H, dd, *J* = 7.6, 8.0 Hz), 3.73-3.59 (2H, br.m), 3.50-3.33 (2H, br.m), 1.52-1.44 (4H, m), 1.26 (18H, s), 1.12-1.03 (4H, m), 0.65 (6H, t, *J* = 7.2 Hz); <sup>13</sup>C NMR δ<sub>C</sub>(100 MHz; CDCl<sub>3</sub>)/ppm 154.0, 143.9, 135.7, 135.3, 135.2, 135.1, 132.7, 131.8, 131.3, 131.2, 131.1, 131.1, 130.9, 130.6, 130.0 (br.), 129.1 (br.), 128.8 (br.), 128.7, 128.5, 128.5, 128.1, 125.4, 124.3, 124.0, 123.7, 123.7, 123.5, 123.4, 123.4, 123.3, 123.1, 122.9, 97.4 (br.), 95.0, 90.0 (br.), 89.6, 89.4, 89.3, 89.2, 89.1, 89.0, 88.6, 88.5, 87.6, 80.4, 49.9, 30.8, 28.1, 19.8, 13.6; FD-LRMS *m/z* 1464.6 (M<sup>+</sup>, 81%), 1465.6 ([M+1]<sup>+</sup>, 100), 1466.6 ([M+2]<sup>+</sup>, 62), 1467.6 ([M+3]<sup>+</sup>, 27), 1468.6 ([M+4]<sup>+</sup>, 11); FD-HRMS Found: 1464.57911, Calc. for C<sub>108</sub>H<sub>76</sub>N<sub>2</sub>O<sub>4</sub>: 1464.58051; UV λ<sub>max</sub>(CH<sub>2</sub>Cl<sub>2</sub>)/nm (log ε) 365 (shoulder 4.47), 340 (sh. 4.76), 320 (sh. 4.89), 304 (5.41), 287 (5.47), 272 (sh. 5.32), 258 (sh. 5.11).

(+)-**4** (1st): mp 185-188 °C (dec); [α]<sub>D</sub><sup>24</sup> = +448 (*c* = 0.215 in chloroform); CD λ(CH<sub>2</sub>Cl<sub>2</sub>)/nm (Δε) 359 (+51.7), 329

(+11.6), 307 (+194.8), 298 (+100.6), 293 (+86.6), 280 (-104.7), 261 (-16.6), 256 (-21.8).

(-)-**4** (2nd):  $[\alpha]_D^{24} = -439$  ( $c = 0.228$  in chloroform); CD  $\lambda(\text{CH}_2\text{Cl}_2)/\text{nm}$  ( $\Delta\epsilon$ ) 357 (-50.0), 329 (-9.5), 307 (-192.6), 298 (-96.5), 293 (-83.3), 280 (+108.2), 262 (+17.1), 257 (+22.6).

**10**: mp 196-199 °C (dec); IR (neat)  $\nu_{\text{max}}/\text{cm}^{-1}$  3058, 2958, 2929, 2871, 2204, 1701, 1594, 1581, 1481, 1366, 1145, 891, 789, 682;  $^1\text{H NMR}$   $\delta_{\text{H}}(400 \text{ MHz}; \text{CDCl}_3; \text{Me}_4\text{Si})/\text{ppm}$  7.83 (2H, br.t), 7.82-7.80 (4H, br.m), 7.72 (2H, br.t), 7.55-7.40 (18H, m), 7.53 (2H, s), 7.37-7.28 (12H, m), 3.49 (4H, t,  $J = 7.6$  Hz), 1.49-1.41 (4H, m), 1.35 (18H, s), 1.29-1.20 (4H, m), 0.85 (6H, t,  $J = 7.2$  Hz);  $^{13}\text{C NMR}$   $\delta_{\text{C}}(100 \text{ MHz}; \text{CDCl}_3)/\text{ppm}$  154.1, 143.0, 138.3, 137.0, 136.8, 134.3, 132.4, 131.9, 131.4, 130.8, 130.6, 130.3, 130.2 (br.), 130.1, 130.1, 129.7, 129.6, 128.7, 128.6, 128.5, 128.1, 125.7, 123.7, 123.6, 123.5, 123.5, 123.4, 123.4, 123.4, 123.3, 96.6, 94.0, 90.0, 90.0, 90.0, 90.0, 89.9, 89.2, 89.1, 89.0, 88.8, 87.7, 86.7, 80.4, 49.5, 30.5, 28.2, 19.9, 13.8; FD-LRMS  $m/z$  1464.6 ( $\text{M}^+$ , 85%), 1465.6 ( $[\text{M}+1]^+$ , 100), 1466.6 ( $[\text{M}+2]^+$ , 65), 1467.6 ( $[\text{M}+3]^+$ , 30), 1468.6 ( $[\text{M}+4]^+$ , 9); FD-HRMS Found: 1464.57902, Calc. for  $\text{C}_{108}\text{H}_{76}\text{N}_2\text{O}_4$ : 1464.58051; UV  $\lambda_{\text{max}}(\text{CH}_2\text{Cl}_2)/\text{nm}$  ( $\log \epsilon$ ) 304 (5.38), 287 (5.47), 279 (sh. 5.37), 272 (sh. 5.32), 256 (sh. 5.18).

### Preparation of **21**

To a solution of **20**<sup>1</sup> (10.5 g, 24.8 mmol) in diethyl ether (250 mL) was added <sup>n</sup>BuLi (1.6 M in hexane, 16.6 mL, 26.1 mmol) at -78 °C under an argon atmosphere, and the mixture was stirred at that temperature for 1 min. To the mixture was added a solution of 1,2-diiodoethane (8.40 g, 29.8 mmol) in diethyl ether (85 mL), and the mixture was further stirred for 30 min. After addition of water, the organic layer was separated, dried over magnesium sulfate, and then roughly purified by column chromatography on  $\text{SiO}_2$  (dichloromethane/hexane) to give an oil product (11.5 g, ca. 98%) containing **21**, which was subjected to the next reaction, even though the purification was incomplete. **21**:  $^1\text{H NMR}$   $\delta_{\text{H}}(400 \text{ MHz}; \text{CDCl}_3; \text{Me}_4\text{Si})/\text{ppm}$  7.63 (1H, t,  $J = 1.6$  Hz), 7.50 (1H, t,  $J = 1.6$  Hz), 7.24 (1H, br.t), 3.57 (2H, t,  $J = 7.6$  Hz), 1.52-1.45 (2H, m), 1.43 (9H, s), 1.33-1.24 (2H, m), 0.90 (3H, t,  $J = 7.2$  Hz), 0.24 (9H, s);  $^{13}\text{C NMR}$   $\delta_{\text{C}}(100 \text{ MHz}; \text{CDCl}_3)/\text{ppm}$  154.0, 143.5, 137.8, 136.4, 129.5, 125.2, 102.6, 96.1, 92.6, 80.6, 49.5, 30.5, 28.3, 19.8, 13.7, -0.2; FD-LRMS  $m/z$  471.1 ( $\text{M}^+$ , 100%), 472.1 ( $[\text{M}+1]^+$ , 29), 473.1 ( $[\text{M}+2]^+$ , 8).

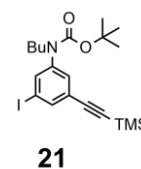

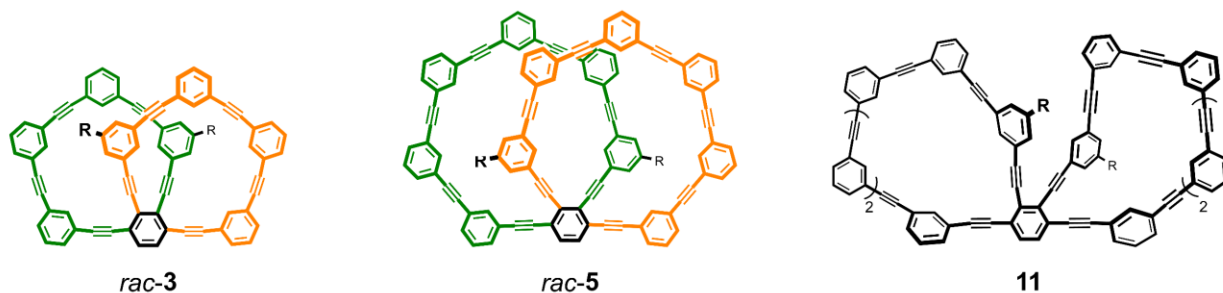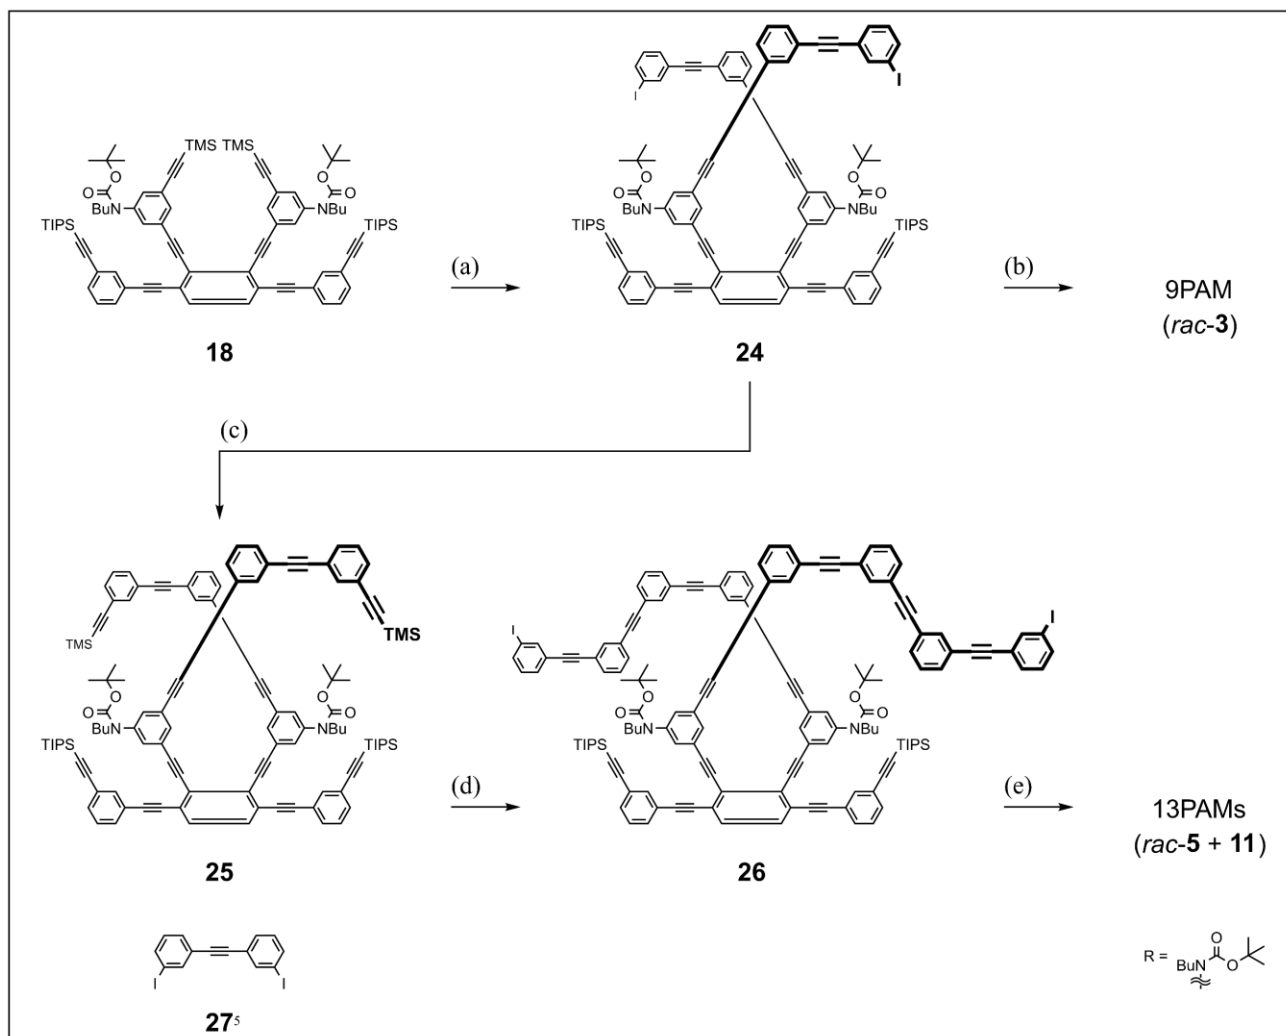

**Scheme S2.** Synthesis of *rac-3* (9PAM), *rac-5* (13PAM) and **11** (13PAM). Reagents and yields: (a) i) NaH, MeOH, THF, ii) **27**, Pd(PPh<sub>3</sub>)<sub>4</sub>, CuI, Et<sub>3</sub>N, THF (71%); (b) i) TBAF, THF (85%), ii) Pd(PPh<sub>3</sub>)<sub>4</sub>, CuI, Et<sub>3</sub>N, THF (42% for *rac-3*); (c) TMSA, Pd(PPh<sub>3</sub>)<sub>4</sub>, CuI, Et<sub>3</sub>N (90%); (d) i) NaH, MeOH, THF (94%), ii) **27**, Pd(PPh<sub>3</sub>)<sub>4</sub>, CuI, Et<sub>3</sub>N, THF (87%); (e) i) TBAF, THF (86%), ii) Pd(PPh<sub>3</sub>)<sub>4</sub>, CuI, Et<sub>3</sub>N, THF (24% for *rac-5* and 12% for **11**).

#### Preparation of **24**

To a solution of **27<sup>5</sup>** (5.39 g, 12.5 mmol), Pd(PPh<sub>3</sub>)<sub>4</sub> (1.09 g, 0.939 mmol) and CuI (358 mg, 1.88 mmol) in Et<sub>3</sub>N (284 mL) was added a solution of **18'** (1.92 g, 1.56 mmol) in THF (28 mL) via a syringe pump over 1 h at 60 °C under an argon atmosphere, and the mixture was stirred at that temperature for 40 min. After removal of a solid by filtration through a Celite pad, the filtrate was concentrated and purified by column chromatography on SiO<sub>2</sub> (1:15 ethyl acetate/hexane) to give **24** (2.03 g, 71%). **24**: <sup>1</sup>H NMR δ<sub>H</sub>(400 MHz; CDCl<sub>3</sub>; Me<sub>4</sub>Si)/ppm 7.88 (2H, t, *J* = 1.6 Hz), 7.69-7.66 (4H, m), 7.60-7.59 (4H, m), 7.53 (2H, dt, *J* = 1.6, 8.0 Hz), 7.52 (2H, s), 7.48 (2H, dt, *J* = 1.6, 8.0 Hz),

7.46-7.34 (10H, m), 7.31-7.26 (4H, m), 7.08 (2H, dd,  $J = 7.6, 8.0$  Hz), 3.55 (4H, t,  $J = 7.6$  Hz), 1.51-1.43 (4H, m), 1.40 (18H, s), 1.29-1.19 (4H, m), 1.12 (42H, s), 0.84 (6H, t,  $J = 7.2$  Hz);  $^{13}\text{C}$  NMR  $\delta_{\text{C}}$ (100 MHz;  $\text{CDCl}_3$ )/ppm 154.1, 143.1, 140.2, 137.4, 135.0, 134.7, 132.3, 132.0, 131.7, 131.5, 131.4, 131.3, 130.7, 129.9, 128.5, 128.4, 128.0, 125.9, 125.1, 124.1, 124.1, 123.9, 123.3, 123.1, 123.0, 105.9, 97.1, 94.8, 93.7, 91.8, 89.8, 89.4, 88.7, 88.2, 88.2, 87.7, 80.5, 49.5, 30.6, 28.3, 19.9, 18.7, 13.7, 11.3; FD-LRMS  $m/z$  1832.6 ( $\text{M}^+$ , 78%), 1833.6 ( $[\text{M}+1]^+$ , 100), 1834.6 ( $[\text{M}+2]^+$ , 75), 1835.6 ( $[\text{M}+3]^+$ , 44), 1836.6 ( $[\text{M}+4]^+$ , 17); FD-HRMS Found: 1832.60859, Calc. for  $\text{C}_{110}\text{H}_{110}\text{I}_2\text{N}_2\text{O}_4\text{Si}_2$ : 1832.60934.

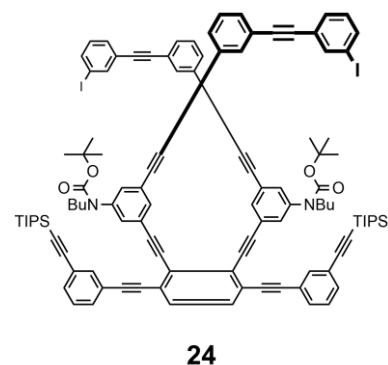

### Preparation of 9PAM (*rac*-3)

To a solution of **24** (252 mg, 0.137 mmol) in THF (9 mL) was added TBAF (1 M in THF, 0.29 mL, 0.29 mmol) at room temperature, and the mixture was stirred at that temperature for 10 min. After dilution with ethyl acetate and water, the organic layer was separated, washed with brine, dried over magnesium sulfate, and then concentrated. The resulting solid was purified by column chromatography on  $\text{SiO}_2$  (1:4 ethyl acetate/hexane) to give **6** (178 mg, 85%). **6**:  $^1\text{H}$  NMR  $\delta_{\text{H}}$ (400 MHz;  $\text{CDCl}_3$ ;  $\text{Me}_4\text{Si}$ )/ppm 7.89 (2H, t,  $J = 1.6$  Hz), 7.71 (2H, t,  $J = 1.6$  Hz), 7.69-7.66 (2H, m), 7.61-7.59 (4H, m), 7.57 (2H, dt,  $J = 1.6, 7.6$  Hz), 7.52 (2H, s), 7.49-7.36 (12H, m), 7.34-7.28 (4H, m), 7.08 (2H, t,  $J = 8.0$  Hz), 3.58 (4H, t,  $J = 7.6$  Hz), 3.07 (2H, s), 1.50-1.45 (4H, m), 1.40 (18H, s), 1.29-1.20 (4H, m), 0.84 (6H, t,  $J = 7.2$  Hz).

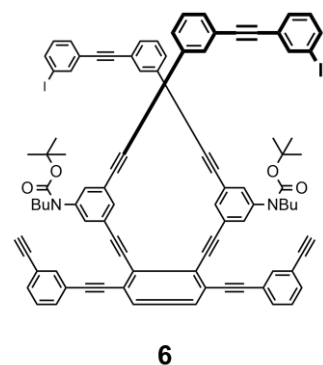

To a solution of  $\text{Pd}(\text{PPh}_3)_4$  (81 mg, 0.070 mmol) and  $\text{CuI}$  (13 mg, 0.068 mmol) in  $\text{Et}_3\text{N}$  (35 mL) was added a solution of **6** (178 mg, 0.117 mmol) in THF (18 mL) via a syringe pump over 20 h at 75 °C under an argon atmosphere. After removal of the solvents by evaporation, the residue was dissolved in dichloromethane, which was washed with brine, dried over magnesium sulfate, and then purified by column chromatography on  $\text{SiO}_2$  (1:4 ethyl acetate/hexane) to give *rac*-**3** (62 mg, 42%). An analytical sample was obtained as a white solid by further purification through GPC (chloroform), followed by HPLC separation with a standard normal-phase column (7:3 dichloromethane/hexane cont. 0.1vol% ethanol). Racemate of (+)-**3** and (–)-**3** was unfortunately inseparable by HPLC separation with either column (CHIRALPAK IA and IF).

*rac*-**3**: mp 179-183 °C (dec); IR (neat)  $\nu_{\text{max}}/\text{cm}^{-1}$  3061, 2958, 2930, 2871, 2204, 1701, 1593, 1577, 1482, 1367, 1145, 891, 789, 682;  $^1\text{H}$  NMR  $\delta_{\text{H}}$ (400 MHz;  $\text{CDCl}_3$ ;  $\text{Me}_4\text{Si}$ )/ppm 8.06-8.01 (4H, m), 7.94 (2H, br.dd), 7.75 (2H, t,  $J = 1.6$  Hz), 7.60 (2H, ddd,  $J = 1.2, 1.6, 8.0$  Hz), 7.58 (2H, s), 7.53 (2H, ddd,  $J = 1.2, 1.6, 8.0$  Hz), 7.46-7.33 (16H, m), 7.21 (2H, br.dd), 3.25 (4H, t,  $J = 7.6$  Hz), 1.42 (18H, s), 1.41-1.34 (4H, m), 1.27-1.17 (4H, m), 0.88 (6H, t,  $J = 7.2$  Hz);  $^{13}\text{C}$  NMR  $\delta_{\text{C}}$ (100 MHz;  $\text{CDCl}_3$ )/ppm 153.9, 143.4, 140.6, 140.3, 134.4, 133.6, 132.8, 131.4, 131.0, 130.3 (br.), 129.7, 129.5, 129.2, 128.8, 128.8, 128.5, 128.1, 128.1, 124.8, 123.8, 123.7, 123.7, 123.6, 123.5, 123.5, 123.4, 97.9, 95.1, 92.5, 92.4, 90.0, 89.9, 89.7, 89.6, 88.9, 88.2, 80.5, 49.5, 30.7, 28.3, 19.9, 13.8; FD-LRMS  $m/z$  1264.5 ( $\text{M}^+$ , 95%), 1265.5 ( $[\text{M}+1]^+$ , 100), 1266.5 ( $[\text{M}+2]^+$ , 61), 1267.5 ( $[\text{M}+3]^+$ , 22), 1268.5 ( $[\text{M}+4]^+$ , 7); FD-HRMS Found: 1264.51662, Calc. for  $\text{C}_{92}\text{H}_{68}\text{N}_2\text{O}_4$ : 1264.51791; UV  $\lambda_{\text{max}}(\text{CH}_2\text{Cl}_2)/\text{nm}$  (log  $\epsilon$ ) 367 (sh. 4.38), 340 (sh. 4.77), 321 (sh. 4.95), 305

(5.33), 289 (5.34), 272 (sh. 5.15), 259 (sh. 4.99).

### Preparation of **25**

To a solution of **24** (1.01 g, 0.549 mmol), Pd(PPh<sub>3</sub>)<sub>4</sub> (25 mg, 0.022 mmol) and CuI (8 mg, 0.04 mmol) in Et<sub>3</sub>N (11 mL) was added TMSA (0.77 mL, 5.4 mmol) at 40 °C under an argon atmosphere, and the mixture was stirred for 3 h. After removal of the solvent by evaporation, the residue was dissolved in dichloromethane, which was passed through a SiO<sub>2</sub>/Celite pad. The filtrate was concentrated and purified by column chromatography on SiO<sub>2</sub> (1:15 ethyl acetate/hexane) to give **25** (880 mg, 90%).

**25**: <sup>1</sup>H NMR δ<sub>H</sub>(400 MHz; CDCl<sub>3</sub>; Me<sub>4</sub>Si)/ppm 7.69 (2H, t, *J* = 1.2 Hz), 7.64 (2H, t, *J* = 1.6 Hz), 7.61 (2H, t, *J* = 1.6 Hz), 7.59 (2H, t, *J* = 1.6 Hz), 7.53 (2H, dt, *J* = 1.6, 8.0 Hz), 7.52 (2H, s), 7.47-7.34 (14H, m), 7.31-7.26 (6H, m), 3.55 (4H, t, *J* = 7.6 Hz), 1.51-1.43 (4H, m), 1.40 (18H, s), 1.29-1.19 (4H, m), 1.12 (42H, s), 0.84 (6H, t, *J* = 7.2 Hz), 0.25 (18H, s); <sup>13</sup>C NMR δ<sub>C</sub>(100 MHz; CDCl<sub>3</sub>)/ppm 154.1, 143.1, 135.0, 135.0, 134.6, 132.3, 132.0, 131.7, 131.6, 131.5, 131.5, 131.3, 130.8, 129.9, 128.5, 128.4, 128.4, 128.0, 125.9, 124.1, 124.1, 123.9, 123.6, 123.3, 123.3, 123.2, 123.0, 105.9, 104.1, 97.1, 95.1, 94.8, 91.8, 89.4, 89.1, 89.0, 88.6, 88.2, 87.7, 80.5, 49.5, 30.5, 28.3, 19.8, 18.6, 13.7, 11.3, -0.1; FD-LRMS *m/z* 1772.9 (M<sup>+</sup>, 63%), 1773.9 ([M+1]<sup>+</sup>, 100), 1774.9 ([M+2]<sup>+</sup>, 96), 1775.9 ([M+3]<sup>+</sup>, 54), 1776.9 ([M+4]<sup>+</sup>, 28), 1777.9 ([M+5]<sup>+</sup>, 12); FD-HRMS Found: 1772.89664, Calc. for C<sub>120</sub>H<sub>128</sub>N<sub>2</sub>O<sub>4</sub>Si<sub>4</sub>: 1772.89511.

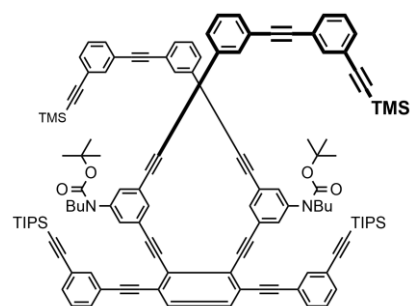

**25**

### Preparation of **26**

To an ice-cooled solution of **25** (828 mg, 0.466 mmol) in THF (9 mL) were added 60% NaH in oil (39 mg, 0.98 mmol) and MeOH (0.28 mL), and the mixture was stirred at room temperature for 15 min, diluted with ethyl acetate, and then quenched with water in an ice water bath. The organic layer was separated, washed with brine, dried over magnesium sulfate, and then concentrated. The resulting solid was purified by column chromatography on SiO<sub>2</sub> (1:8 ethyl acetate/hexane) to give **25'** (711 mg, 94%).

**25'**: <sup>1</sup>H NMR δ<sub>H</sub>(400 MHz; CDCl<sub>3</sub>; Me<sub>4</sub>Si)/ppm 7.69 (2H, t, *J* = 1.6 Hz), 7.65 (2H, t, *J* = 1.6 Hz), 7.61 (2H, t, *J* = 1.6 Hz), 7.59 (2H, t, *J* = 1.6 Hz), 7.54-7.48 (4H, m), 7.52 (2H, s), 7.47-7.35 (12H, m), 7.33-7.26 (6H, m), 3.55 (4H, t, *J* = 7.6 Hz), 3.10 (2H, s), 1.51-1.43 (4H, m), 1.40 (18H, s), 1.29-1.21 (4H, m), 1.12 (42H, s), 0.84 (6H, t, *J* = 7.2 Hz).

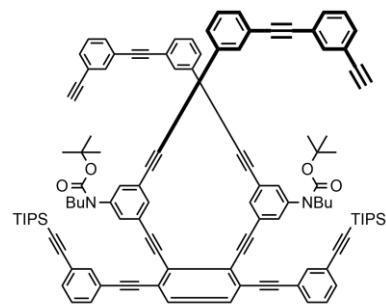

**25'**

To a solution of **27** (1.50 g, 3.50 mmol), Pd(PPh<sub>3</sub>)<sub>4</sub> (303 mg, 0.262 mmol) and CuI (100 mg, 0.525 mmol) in Et<sub>3</sub>N (79 mL) was added a solution of **25'** (711 mg, 0.436 mmol) in THF (8 mL) via a syringe pump over 1 h at 60 °C under an argon atmosphere, and the mixture was stirred at that temperature for 30 min. After removal of the solvents by evaporation, the residue was dissolved in dichloromethane, which was passed through a SiO<sub>2</sub>/Celite pad. The filtrate was

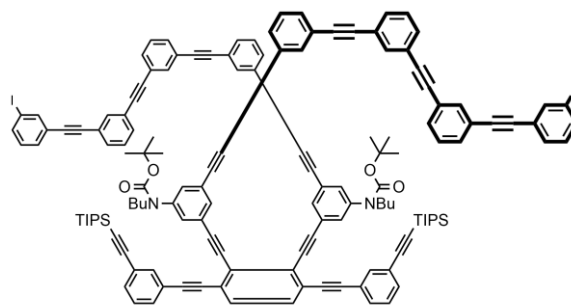

**26**

concentrated and purified by column chromatography on SiO<sub>2</sub> (1:8 ethyl acetate/hexane) to give **26** (849 mg, 87%).

**26**: <sup>1</sup>H NMR δ<sub>H</sub>(400 MHz; CDCl<sub>3</sub>; Me<sub>4</sub>Si)/ppm 7.89 (2H, t, *J* = 1.6 Hz), 7.71-7.66 (8H, m), 7.62 (2H, t, *J* = 1.2 Hz), 7.60 (2H, t, *J* = 1.2 Hz), 7.54-7.26 (32H, m), 7.08 (2H, dd, *J* = 7.6, 8.0 Hz), 3.56 (4H, t, *J* = 7.6 Hz), 1.51-1.44 (4H, m), 1.40 (18H, s), 1.29-1.19 (4H, m), 1.12 (42H, s), 0.84 (6H, t, *J* = 7.2 Hz); <sup>13</sup>C NMR δ<sub>C</sub>(100 MHz; CDCl<sub>3</sub>)/ppm 154.2, 143.2, 140.2, 137.4, 135.0, 134.7, 134.7, 132.3, 132.1, 131.6, 131.5, 131.5, 131.5, 131.3, 130.7, 129.9, 128.6, 128.5, 128.4, 128.0, 125.9, 125.1, 124.1, 124.1, 123.9, 123.5, 123.4, 123.3, 123.2, 123.2, 123.0, 105.9, 97.1, 94.8, 93.7, 91.8, 89.8, 89.5, 89.2, 89.2, 89.1, 89.1, 88.7, 88.3, 88.2, 87.7, 80.5, 49.5, 30.6, 28.3, 19.9, 18.7, 13.7, 11.3; FD-LRMS *m/z* 1116.4 (M<sup>2+</sup>, 57%), 1116.9 ([M+1]<sup>2+</sup>, 100), 1117.4 ([M+2]<sup>2+</sup>, 99), 1117.9 ([M+3]<sup>2+</sup>, 74), 1118.4 ([M+4]<sup>2+</sup>, 47), 1118.9 ([M+5]<sup>2+</sup>, 30), 2232.8 (M<sup>+</sup>, 35), 2233.8 ([M+1]<sup>+</sup>, 67), 2234.8 ([M+2]<sup>+</sup>, 63), 2235.8 ([M+3]<sup>+</sup>, 40), 2236.8 ([M+4]<sup>+</sup>, 20), 2237.8 ([M+5]<sup>+</sup>, 9); FD-HRMS Found: 2232.73474, Calc. for C<sub>142</sub>H<sub>126</sub>I<sub>2</sub>N<sub>2</sub>O<sub>4</sub>Si<sub>2</sub>: 2232.73454.

#### Preparation of 13PAMs (+)-**5**, (-)-**5** and **11**

To a solution of **26** (1.43 g, 0.638 mmol) in THF (40 mL) was added TBAF (1 M in THF, 1.34 mL, 1.34 mmol) at room temperature, and the mixture was stirred at that temperature for 17 min. After dilution with dichloromethane and water, the organic layer was separated, washed with brine, dried over magnesium sulfate, and then concentrated. The resulting solid was purified by column

chromatography on SiO<sub>2</sub> (1:6 ethyl acetate/hexane) to give **8** (1.06 g, 86%). **8**: <sup>1</sup>H NMR δ<sub>H</sub>(400 MHz; CDCl<sub>3</sub>; Me<sub>4</sub>Si)/ppm 7.89 (2H, t, *J* = 1.6 Hz), 7.71-7.66 (8H, m), 7.63 (2H, t, *J* = 1.2 Hz), 7.62 (2H, t, *J* = 1.2 Hz), 7.65 (2H, dt, *J* = 1.6, 7.6 Hz), 7.51-7.28 (30H, m), 7.08 (2H, t, *J* = 8.0 Hz), 3.58 (4H, t, *J* = 7.6 Hz), 3.08 (2H, s), 1.53-1.45 (4H, m), 1.41 (18H, s), 1.30-1.20 (4H, m), 0.84 (6H, t, *J* = 7.2 Hz).

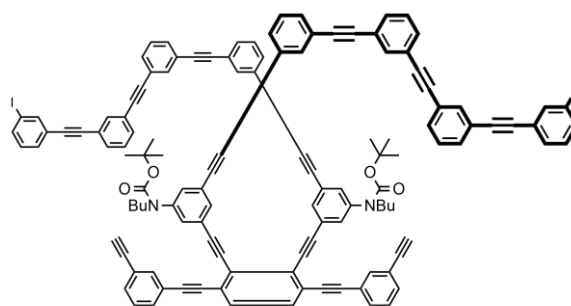

**8**

To a solution of Pd(PPh<sub>3</sub>)<sub>4</sub> and CuI in Et<sub>3</sub>N was added a solution of **8** in THF via a syringe pump over hours at 75 °C under an argon atmosphere [The reactions were implemented in five batches. The crude products were combined and purified at once]. After removal of the solvents by evaporation, the residue was dissolved in dichloromethane, which was washed with brine, dried over magnesium sulfate, and then purified by column chromatography on SiO<sub>2</sub> (1:2 ethyl acetate/hexane) to give *rac*-**5** (217 mg, 24%) and **11** (109 mg, 12%). Each product was further purified by GPC (chloroform), followed by HPLC separation with a standard normal-phase column (6:4 dichloromethane/hexane cont. 0.1vol% ethanol) to give a white solid, respectively. (+)-**5** and (-)-**5** were isolated in



this order by HPLC separation with a chiral stationary column (3:7 chloroform/hexane; CHIRALPAK IA).

|   | <b>8</b> (total)                      | Pd(PPh <sub>3</sub> ) <sub>4</sub> | CuI                  | Et <sub>3</sub> N | time |
|---|---------------------------------------|------------------------------------|----------------------|-------------------|------|
| 1 | 1.02 g<br>(0.533 mmol)<br>/160 mL THF | 148 mg<br>(0.128 mmol)             | 25 mg<br>(0.13 mmol) | 64 mL             | 21 h |
| 2 |                                       | 148 mg<br>(0.128 mmol)             | 24 mg<br>(0.13 mmol) | 64 mL             | 22 h |
| 3 |                                       | 148 mg<br>(0.128 mmol)             | 24 mg<br>(0.13 mmol) | 64 mL             | 22 h |
| 4 |                                       | 147 mg<br>(0.127 mmol)             | 25 mg<br>(0.13 mmol) | 64 mL             | 21 h |
| 5 |                                       | 147 mg<br>(0.127 mmol)             | 26 mg<br>(0.14 mmol) | 64 mL             | 21 h |

*rac*-**5**: mp 164-167 °C (dec); IR (neat)  $\nu_{\max}/\text{cm}^{-1}$  3061, 2960, 2929, 2871, 2210, 1700, 1597, 1583, 1482, 1367, 1145, 890, 789, 682; <sup>1</sup>H NMR  $\delta_{\text{H}}$ (400 MHz; CDCl<sub>3</sub>; Me<sub>4</sub>Si)/ppm 7.74 (2H, br.t), 7.71-7.69 (4H, br.m), 7.66 (2H, br.t), 7.64 (2H, br.t), 7.59-7.49 (18H, m), 7.46 (2H, dt,  $J = 1.2, 8.0$  Hz), 7.42-7.30 (16H, m), 7.09 (2H, dd,  $J = 7.6, 8.0$  Hz), 3.63-3.52 (4H, m), 1.50-1.43 (4H, m), 1.36 (18H, s), 1.25-1.18 (4H, m), 0.80 (6H, t,  $J = 7.2$  Hz); <sup>13</sup>C NMR  $\delta_{\text{C}}$ (100 MHz; CDCl<sub>3</sub>)/ppm 154.1, 143.1, 134.4, 134.4, 134.2, 134.1, 132.2, 132.0, 131.9, 131.8, 131.8, 131.7, 131.7, 131.6, 131.6, 131.5, 130.9, 130.0, 128.6, 128.5, 128.4, 128.4, 128.4, 128.2, 125.5, 124.2, 123.8, 123.7, 123.5 (sh.), 123.5, 123.4, 123.4, 123.3, 123.2, 123.1, 97.4, 94.5, 89.6, 89.3, 89.3, 89.2, 89.1, 89.1, 89.0, 88.9, 88.6, 88.2, 87.5, 80.4, 49.3, 30.5, 28.2, 19.9, 13.7; FD-LRMS  $m/z$  1664.7 (M<sup>+</sup>, 75%), 1665.7 ([M+1]<sup>+</sup>, 100), 1666.7 ([M+2]<sup>+</sup>, 69), 1667.7 ([M+3]<sup>+</sup>, 33), 1668.7 ([M+4]<sup>+</sup>, 12); FD-HRMS Found: 1664.64403, Calc. for C<sub>124</sub>H<sub>84</sub>N<sub>2</sub>O<sub>4</sub>: 1664.64311; UV  $\lambda_{\max}(\text{CH}_2\text{Cl}_2)/\text{nm}$  (log  $\epsilon$ ) 365 (sh. 4.26), 340 (sh. 4.73), 323 (sh. 4.89), 304 (5.42), 287 (5.50), 272 (sh. 5.37), 257 (sh. 5.20).

(+)-**5** (1st):  $[\alpha]_{\text{D}}^{24} = +391$  ( $c = 0.188$  in chloroform); CD  $\lambda(\text{CH}_2\text{Cl}_2)/\text{nm}$  ( $\Delta\epsilon$ ) 358 (+27.1), 346 (+17.6), 341 (+19.5), 326 (+11.2), 307 (+239.7), 298 (sh. +114.5), 293 (sh. +88.0), 279 (−92.3), 271 (sh. −73.8).

(−)-**5** (2nd):  $[\alpha]_{\text{D}}^{24} = -373$  ( $c = 0.154$  in chloroform); CD  $\lambda(\text{CH}_2\text{Cl}_2)/\text{nm}$  ( $\Delta\epsilon$ ) 357 (−26.0), 346 (−15.8), 340 (−18.2), 327 (−10.3), 307 (−233.5), 298 (sh. −108.3), 293 (sh. −84.2), 279 (+94.1), 271 (sh. +75.6).

**11**: mp 179-184 °C (dec); IR (neat)  $\nu_{\max}/\text{cm}^{-1}$  3062, 2958, 2929, 2871, 2207, 1701, 1595, 1581, 1481, 1366, 1144, 890, 789, 682; <sup>1</sup>H NMR  $\delta_{\text{H}}$ (400 MHz; CDCl<sub>3</sub>; Me<sub>4</sub>Si)/ppm 7.80 (2H, br.t), 7.78 (2H, br.t), 7.71-7.66 (6H, br.m), 7.57-7.41 (22H, m), 7.52 (2H, s), 7.39-7.28 (14H, m), 3.51 (4H, t,  $J = 7.6$  Hz), 1.50-1.43 (4H, m), 1.37 (18H, s), 1.28-1.19 (4H, m), 0.84 (6H, t,  $J = 7.2$  Hz); <sup>13</sup>C NMR  $\delta_{\text{C}}$ (100 MHz; CDCl<sub>3</sub>)/ppm 154.1, 143.1, 136.2, 136.1, 135.4, 135.3, 133.9, 132.3, 131.9, 131.4, 131.4, 131.3, 131.2, 131.2, 131.1, 131.0, 130.8, 130.7, 130.7, 130.1 (br.), 128.6, 128.6, 128.5, 128.1, 126.0, 123.9, 123.8, 123.6, 123.4 (sh.), 123.4, 123.4, 123.3, 123.2, 96.9, 94.5, 89.5, 89.4, 89.4, 89.4, 89.2, 89.1, 89.0, 88.6, 88.0, 87.2, 80.4, 49.4, 30.5, 28.3, 19.9, 13.7; FD-LRMS  $m/z$  1664.6 (M<sup>+</sup>, 67%), 1665.7 ([M+1]<sup>+</sup>, 100), 1666.7 ([M+2]<sup>+</sup>, 67), 1667.7 ([M+3]<sup>+</sup>, 37), 1668.7 ([M+4]<sup>+</sup>, 11); FD-HRMS Found: 1664.64185, Calc. for C<sub>124</sub>H<sub>84</sub>N<sub>2</sub>O<sub>4</sub>: 1664.64311; UV  $\lambda_{\max}(\text{CH}_2\text{Cl}_2)/\text{nm}$  (log  $\epsilon$ ) 304 (5.47), 287 (5.53), 279 (sh. 5.43), 272 (sh. 5.38), 256 (sh. 5.22).

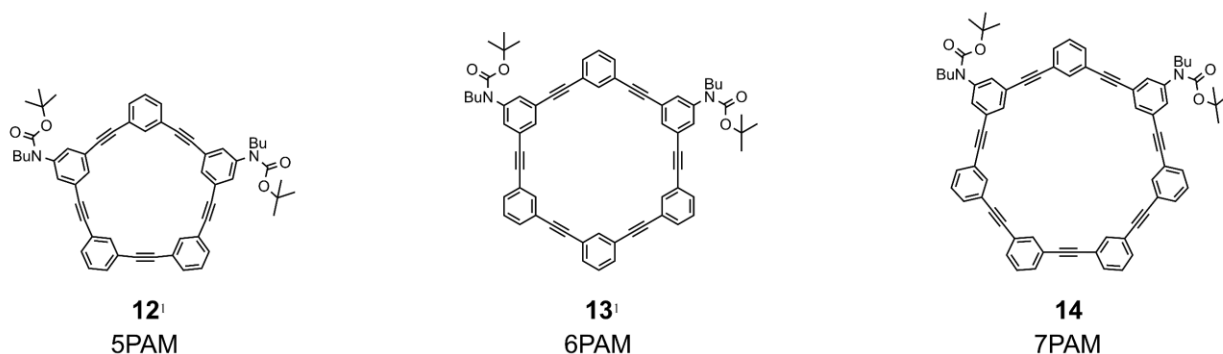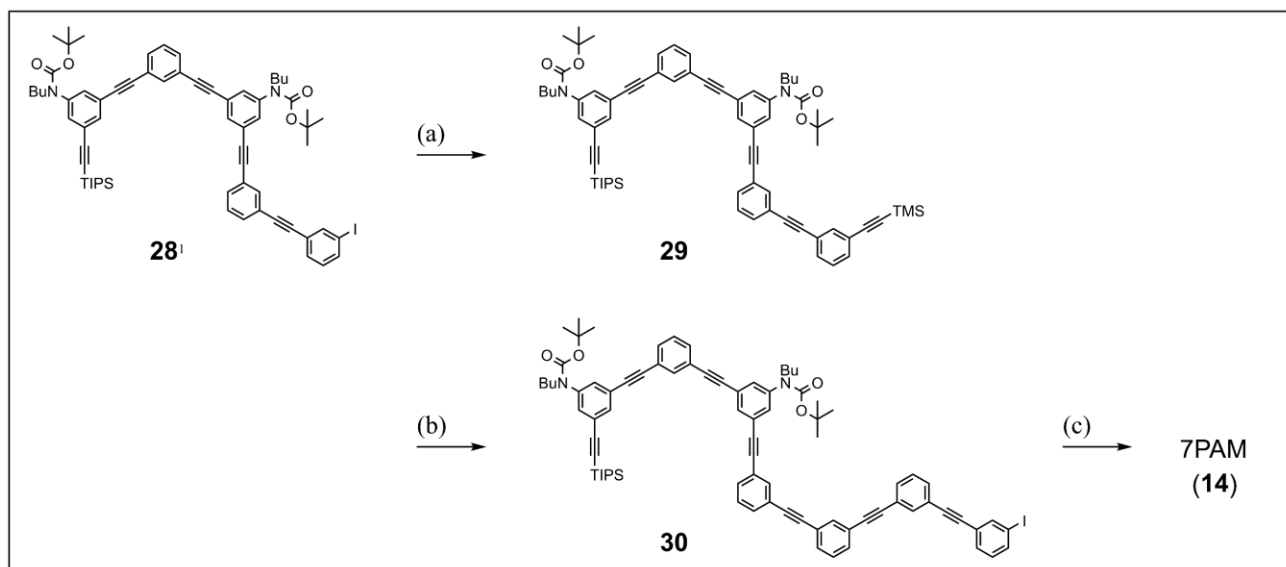

**Scheme S3.** Synthesis of reference ring **14** (7PAM). Reagents and yields: (a) TMSA, Pd(PPh<sub>3</sub>)<sub>4</sub>, CuI, Et<sub>3</sub>N, THF (87%); (b) i) K<sub>2</sub>CO<sub>3</sub>, MeOH, THF (91%), ii) **27**, Pd(PPh<sub>3</sub>)<sub>4</sub>, CuI, Et<sub>3</sub>N, THF (89%); (c) i) TBAF, THF (86%), ii) Pd(PPh<sub>3</sub>)<sub>4</sub>, CuI, Et<sub>3</sub>N, THF (75%).

#### Preparation of **29**

To a solution of **28<sup>1</sup>** (998 mg, 0.886 mmol), Pd(PPh<sub>3</sub>)<sub>4</sub> (20 mg, 0.017 mmol) and CuI (7 mg, 0.04 mmol) in Et<sub>3</sub>N (3 mL) and THF (3 mL) was added TMSA (0.25 mL, 1.8 mmol) at room temperature under an argon atmosphere, and the mixture was stirred for 4 h. After removal of a solid by filtration through a Celite pad, the filtrate was concentrated and purified by column chromatography on SiO<sub>2</sub> (1:1-2:1-3:1 dichloromethane/hexane) to give **29** (845 mg, 87%). **29**: <sup>1</sup>H NMR δ<sub>H</sub>(400 MHz; CDCl<sub>3</sub>; Me<sub>4</sub>Si)/ppm 7.71 (1H, br.t), 7.70 (1H, br.t), 7.66 (1H, br.t), 7.54 (1H, t, *J* = 1.2 Hz), 7.52-7.45 (6H, m), 7.43 (1H, ddd, *J* = 1.2, 1.6, 8.0 Hz), 7.37-7.26 (7H, m), 3.65 (2H, t, *J* = 7.2 Hz), 3.63 (2H, t, *J* = 7.6 Hz), 1.63-1.47 (4H, m), 1.47 (9H, s), 1.45 (9H, s), 1.39-1.28 (4H, m), 1.14 (21H, br.s), 0.93 (3H, t, *J* = 7.6 Hz), 0.92 (3H, t, *J* = 7.2 Hz), 0.26 (9H, s); <sup>13</sup>C NMR δ<sub>C</sub>(100 MHz; CDCl<sub>3</sub>)/ppm 154.3, 154.3, 143.0, 142.8, 135.1, 134.7, 134.7, 132.6, 132.1, 131.8, 131.6, 131.5, 130.5, 130.3, 130.2, 128.6, 128.4, 124.4, 123.9, 123.9, 123.6, 123.6, 123.5, 123.3, 123.3, 123.3, 123.2, 105.6, 104.0, 95.1, 91.9, 89.3, 89.3, 89.2, 89.1, 89.0, 88.8, 88.8, 88.7, 80.5, 80.5, 49.6, 46.3, 30.6, 30.6, 28.3, 28.3, 19.9, 19.9, 18.6, 13.8, 13.8, 11.3, -0.1; FD-LRMS *m/z* 1096.6 (M<sup>+</sup>, 100%), 1097.6 ([M+1]<sup>+</sup>, 93), 1098.6 ([M+2]<sup>+</sup>, 50), 1099.6 ([M+3]<sup>+</sup>, 19); FD-HRMS Found: 1096.59733, Calc. for C<sub>72</sub>H<sub>84</sub>N<sub>2</sub>O<sub>4</sub>Si<sub>2</sub>: 1096.59696.

### Preparation of **30**

To a solution of **29** (2.23 g, 2.03 mmol) in THF (11 mL) and MeOH (11 mL) was added  $K_2CO_3$  (287 mg, 2.11 mmol) at room temperature, and the mixture was stirred at that temperature for 35 min. After removal of a solid by filtration through a Celite pad, the filtrate was concentrated and purified by column chromatography on  $SiO_2$  (1:4 dichloromethane/hexane-dichloromethane) to give **29'** (1.90 g, 91%). **29'**:  $^1H$  NMR  $\delta_H$ (400 MHz;  $CDCl_3$ ;  $Me_4Si$ )/ppm 7.72-7.71 (2H, br.m), 7.67 (1H, t,  $J = 1.6$  Hz), 7.54 (1H, t,  $J = 1.2$  Hz), 7.53-7.46 (7H, br.m), 7.38-7.26 (7H, m), 3.65 (2H, t,  $J = 7.6$  Hz), 3.63 (2H, t,  $J = 7.6$  Hz), 3.10 (1H, s), 1.59-1.50 (4H, m), 1.47 (9H, s), 1.45 (9H, s), 1.37-1.29 (4H, m), 1.14 (21H, br.s), 0.93 (3H, t,  $J = 7.6$  Hz), 0.92 (3H, t,  $J = 7.2$  Hz).

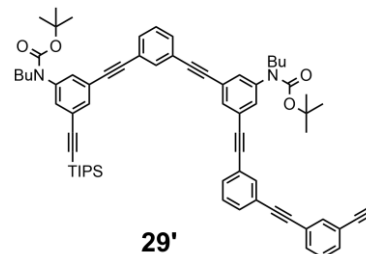

To a solution of **27** (3.04 g, 7.08 mmol),  $Pd(PPh_3)_4$  (601 mg, 0.520 mmol) and  $CuI$  (198 mg, 1.04 mmol) in  $Et_3N$  (173 mL) was added a solution of **29'** (1.90 g, 1.73 mmol) in THF (17 mL) via a syringe pump over 3 h at  $60^\circ C$  under an argon atmosphere, and the mixture was stirred at that temperature for 30 min. After removal of a solid by filtration through a Celite pad, the filtrate was concentrated and purified by column chromatography on  $SiO_2$  (1:1 dichloromethane/hexane-dichloromethane) to give **30** (2.05 g, 89%). **30**:  $^1H$  NMR  $\delta_H$ (400 MHz;  $CDCl_3$ ;  $Me_4Si$ )/ppm 7.90 (1H, t,  $J = 1.6$  Hz), 7.74-7.69 (4H, m), 7.68 (1H, ddd,  $J = 1.2, 1.6, 8.0$  Hz), 7.55 (1H, t,  $J = 1.6$  Hz), 7.53-7.47 (10H, m), 7.39-7.26 (8H, m), 7.09 (1H, t,  $J = 8.0$  Hz), 3.65 (2H, t,  $J = 7.6$  Hz), 3.62 (2H, t,  $J = 7.6$  Hz), 1.59-1.47 (4H, m), 1.47 (9H, s), 1.45 (9H, s), 1.38-1.27 (4H, m), 1.14 (21H, br.s), 0.93 (3H, t,  $J = 7.2$  Hz), 0.92 (3H, t,  $J = 7.2$  Hz);  $^{13}C$  NMR  $\delta_C$ (100 MHz;  $CDCl_3$ )/ppm 154.3, 154.3, 143.0, 142.8, 140.2, 137.4, 134.7, 134.7, 132.6, 132.1, 131.6, 131.6, 131.5, 131.5, 130.7, 130.5, 130.3, 130.2, 129.8, 128.6, 125.1, 124.4, 123.9, 123.9, 123.6, 123.4, 123.4, 123.3, 123.3, 123.2, 105.6, 93.7, 91.9, 89.8, 89.3, 89.3, 89.2, 89.1, 89.1, 89.1, 88.8, 88.8, 88.7, 88.3, 80.5, 80.5, 49.6, 30.6, 30.6, 28.3, 28.3, 19.9, 19.9, 18.6, 13.8, 13.8, 11.3; FD-LRMS  $m/z$  1326.5 ( $M^+$ , 100%), 1327.5 ( $[M+1]^+$ , 97), 1328.5 ( $[M+2]^+$ , 52), 1329.6 ( $[M+3]^+$ , 21); FD-HRMS Found: 1326.51652, Calc. for  $C_{83}H_{83}IN_2O_4Si$ : 1326.51668.

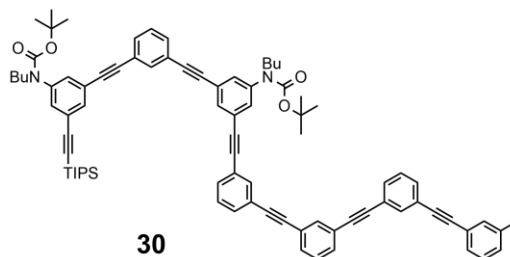

### Preparation of **14** (7PAM)

To a solution of **30** (416 mg, 0.313 mmol) in THF (9 mL) was added TBAF (1 M in THF, 0.33 mL, 0.33 mmol) at room temperature, and the mixture was stirred at that temperature for 20 min. The reaction mixture was diluted with ethyl acetate, which was neutralized by a little amount of 0.1M aq. HCl and washed with water. The organic layer was separated, concentrated and then purified by column chromatography on  $SiO_2$  (1:1 dichloromethane/hexane-dichloromethane) to give **30'** (316 mg, 86%). **30'**:  $^1H$  NMR  $\delta_H$ (400 MHz;  $CDCl_3$ ;  $Me_4Si$ )/ppm 7.90 (1H, t,  $J = 1.6$  Hz), 7.73-7.67 (4H, m), 7.56-7.48 (12H, m), 7.39-7.26 (8H, m), 7.09 (1H, t,  $J = 8.0$  Hz), 3.65 (2H, t,  $J = 7.6$  Hz), 3.62 (2H, t,  $J = 7.6$  Hz), 3.11 (1H, s), 1.59-1.48 (4H, m), 1.47 (9H, s), 1.45 (9H, s), 1.37-1.25 (4H, m), 0.93 (3H, t,  $J = 7.2$  Hz), 0.91 (3H, t,  $J = 7.2$  Hz).

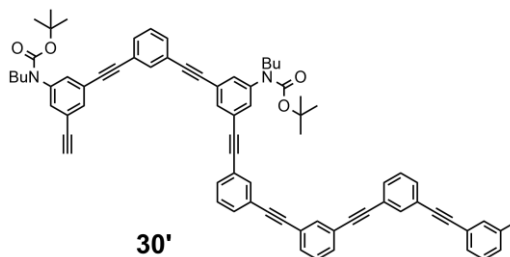

To a solution of Pd(PPh<sub>3</sub>)<sub>4</sub> (139 mg, 0.120 mmol) and CuI (23 mg, 0.12 mmol) in Et<sub>3</sub>N (30 mL) was added a solution of **30'** (234 mg, 0.200 mmol) in THF (15 mL) via a syringe pump over 18 h at 70-80 °C under an argon atmosphere. After removal of a solid by filtration through a Celite pad, the filtrate was diluted with dichloromethane, which was washed with water, dried over magnesium sulfate, and then concentrated. The resulting solid was purified by column chromatography on SiO<sub>2</sub> (dichloromethane) to give **14** (156 mg, 75%, low reproducibility). An analytical sample was obtained as a white amorphous solid by further purification through GPC

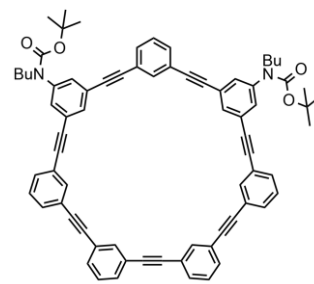

**14**

(chloroform), followed by HPLC separation with a standard normal-phase column (9:1 dichloromethane/hexane cont. 0.1vol% ethanol). **14**: <sup>1</sup>H NMR δ<sub>H</sub>(400 MHz; CDCl<sub>3</sub>; Me<sub>4</sub>Si)/ppm 7.78-7.66 (5H, br.), 7.56 (2H, t, *J* = 1.2 Hz), 7.55-7.49 (10H, m), 7.42-7.33 (9H, m), 3.65 (4H, t, *J* = 7.6 Hz), 1.59-1.52 (4H, m), 1.47 (18H, s), 1.38-1.29 (4H, m), 0.93 (6H, t, *J* = 7.2 Hz); <sup>13</sup>C NMR δ<sub>C</sub>(100 MHz; CDCl<sub>3</sub>)/ppm 154.3, 143.0, 134.3, 134.3, 134.2, 131.9, 131.8, 131.7, 130.5, 128.5, 123.9, 123.9, 123.5, 123.4, 123.4, 123.3, 123.3, 89.3, 89.2, 89.2, 89.1, 89.1, 88.8, 88.7, 80.6, 49.6, 30.6, 28.4, 19.9, 13.8; FD-LRMS *m/z* 1042.5 (M<sup>+</sup>, 100%), 1043.5 ([M+1]<sup>+</sup>, 88), 1044.5 ([M+2]<sup>+</sup>, 40), 1045.5 ([M+3]<sup>+</sup>, 14); FD-HRMS Found: 1042.47229, Calc. for C<sub>74</sub>H<sub>62</sub>N<sub>2</sub>O<sub>4</sub>: 1042.47096.

## References

- 1 R. Katoono, Y. Obara, K. Kusaka and T. Suzuki, *Chem. Commun.*, 2018, **54**, 735.
- 2 V. Diemer, F. R. Leroux and F. Colobert, *Eur. J. Org. Chem.*, 2011, 327.
- 3 S. Y.-L. Leung, A. Y.-Y. Tam, C.-H. Tao, H. S. Chow and V. W.-W. Yam, *J. Am. Chem. Soc.*, 2012, **134**, 1047.
- 4 H.-B. Yang, K. Ghosh, N. Das and P. J. Stang, *Org. Lett.*, 2006, **8**, 3991.
- 5 A. Orita, K. Miyamoto, M. Nakashima, F. Ye and J. Otera, *Adv. Synth. Catal.*, 2004, **346**, 767.

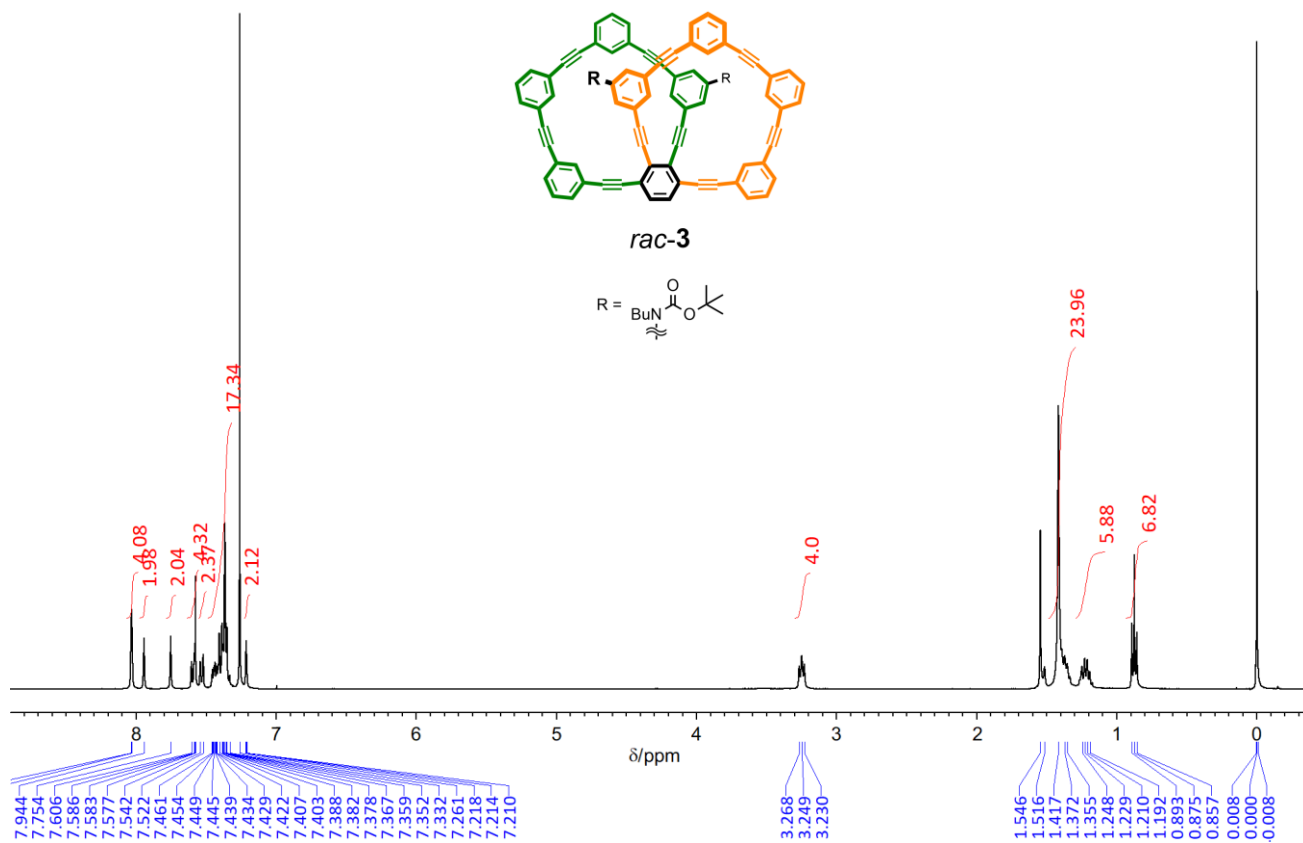

<sup>1</sup>H NMR spectrum (400 MHz) of *rac-3* (9PAM), measured in chloroform-*d* at room temperature.

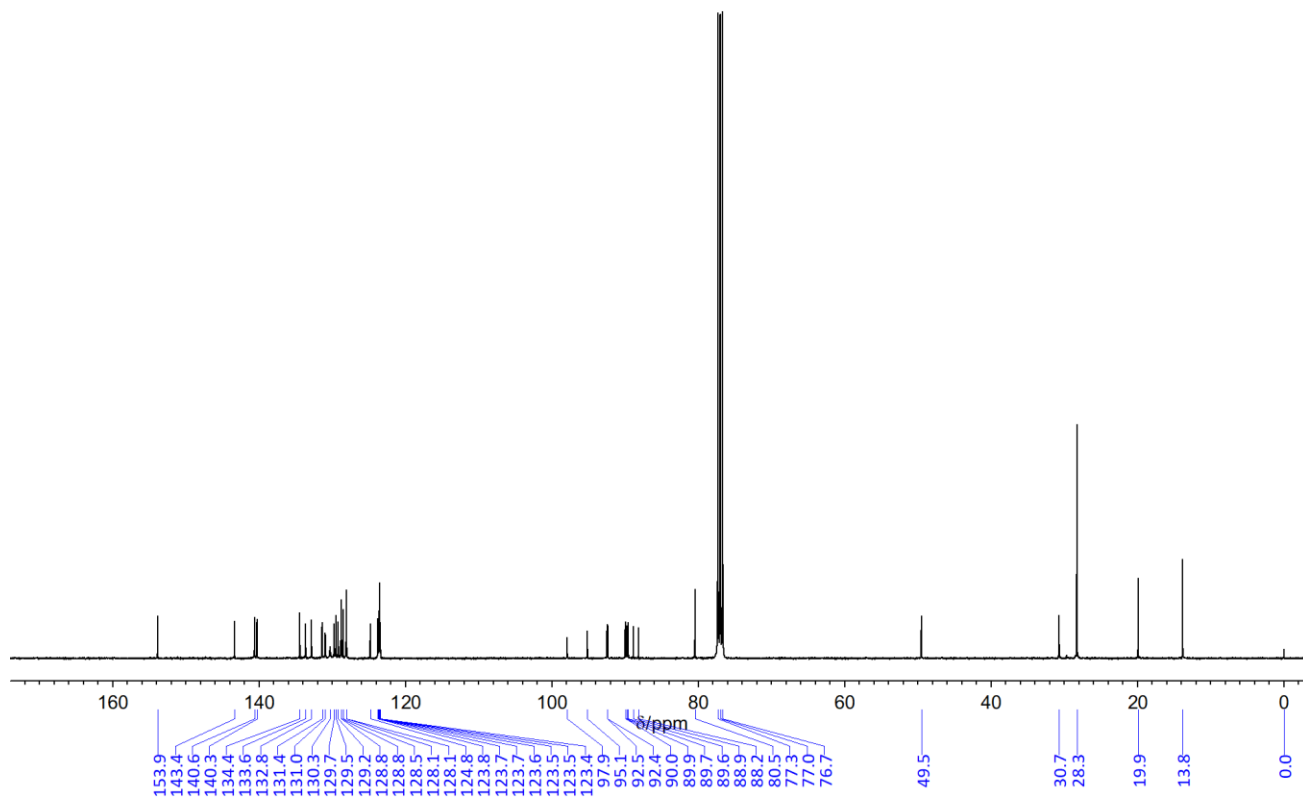

<sup>13</sup>C NMR spectrum (100 MHz) of *rac-3* (9PAM), measured in chloroform-*d* at room temperature.

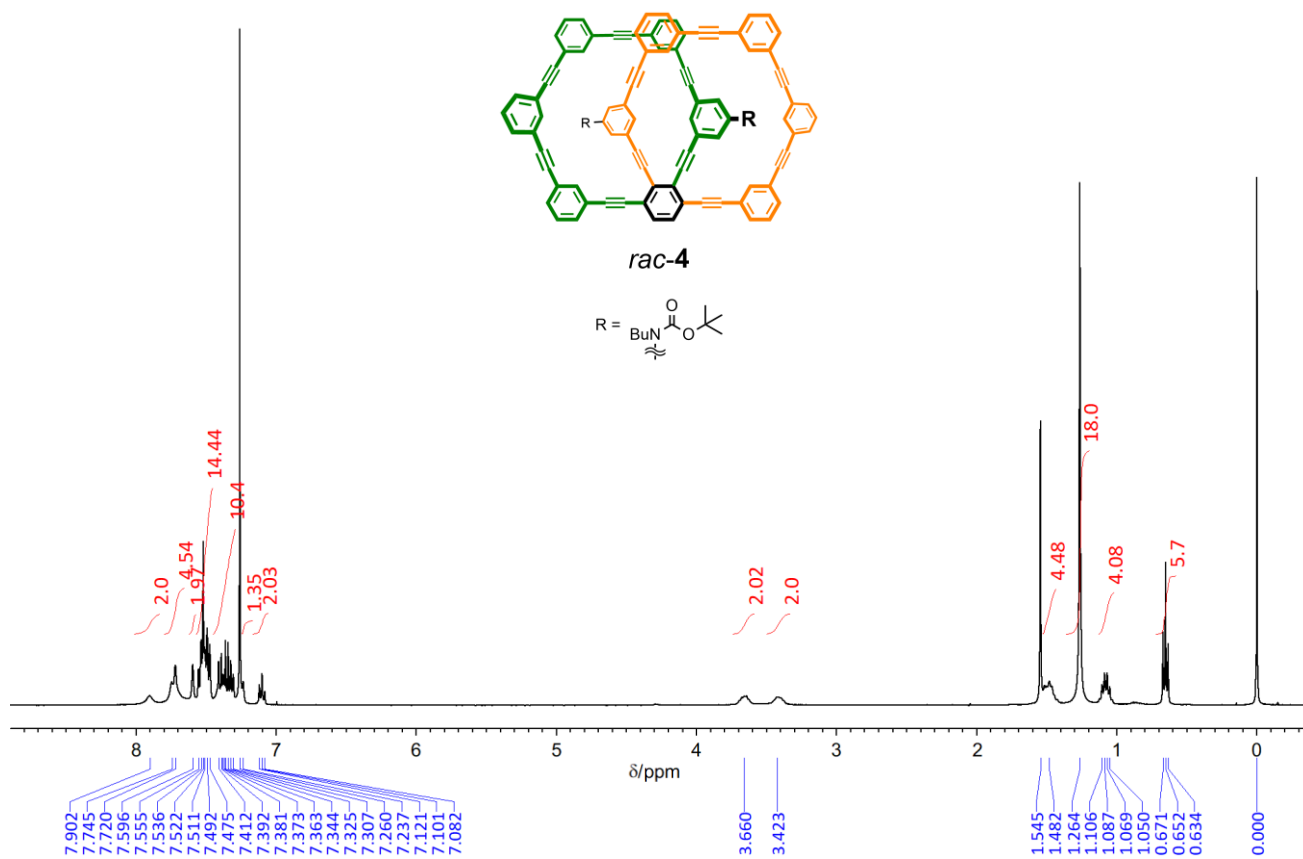

<sup>1</sup>H NMR spectrum (400 MHz) of *rac-4* (11PAM), measured in chloroform-*d* at room temperature.

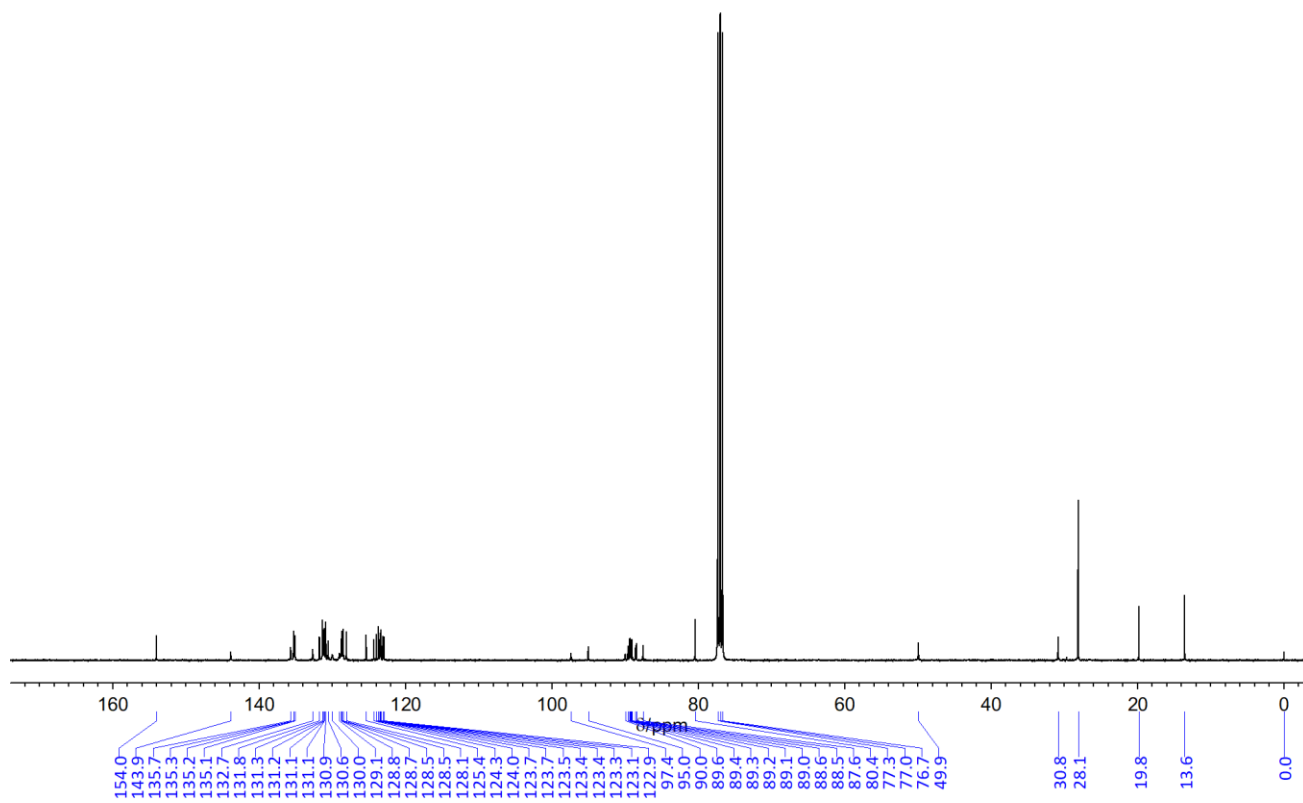

<sup>13</sup>C NMR spectrum (100 MHz) of *rac-4* (11PAM), measured in chloroform-*d* at room temperature.

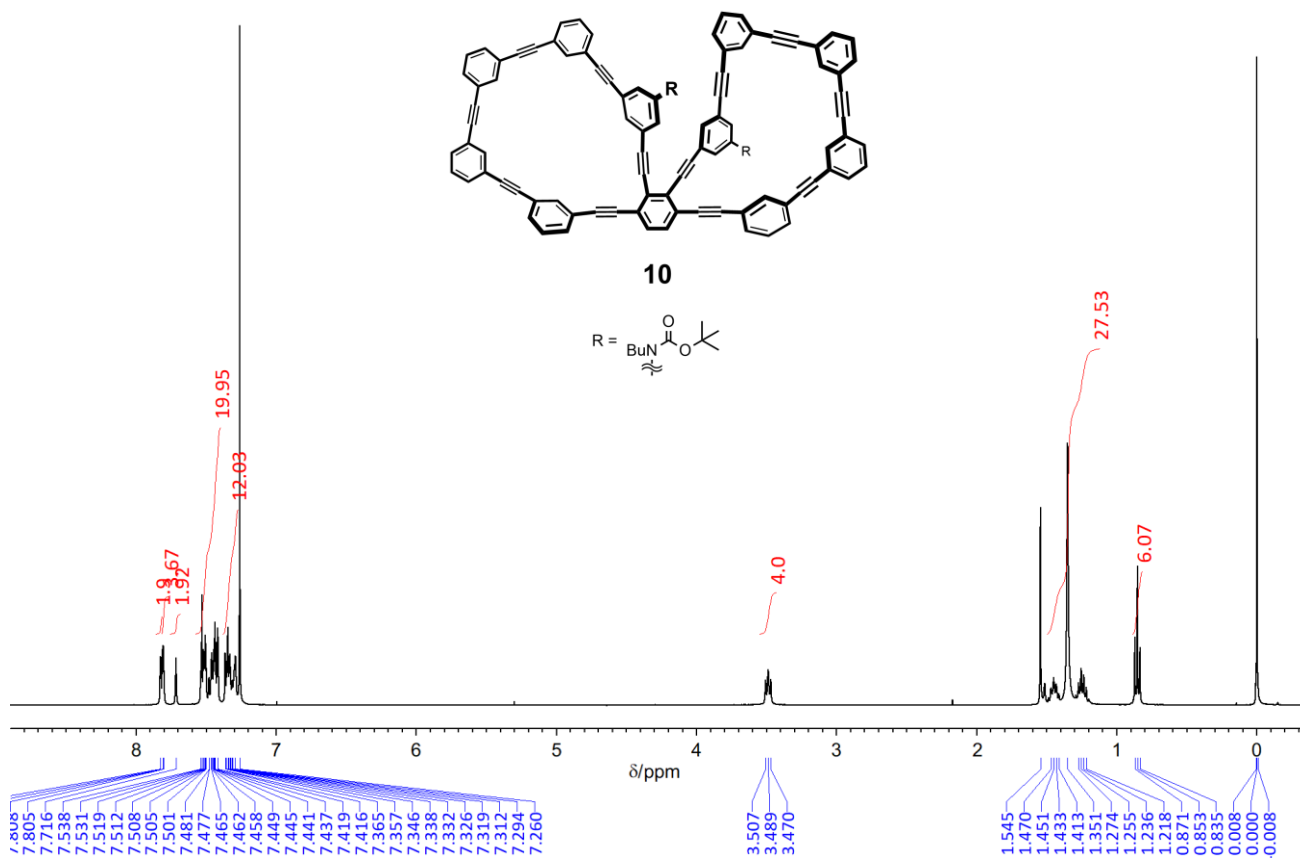

$^1\text{H}$  NMR spectrum (400 MHz) of **10** (11PAM), measured in chloroform-*d* at room temperature.

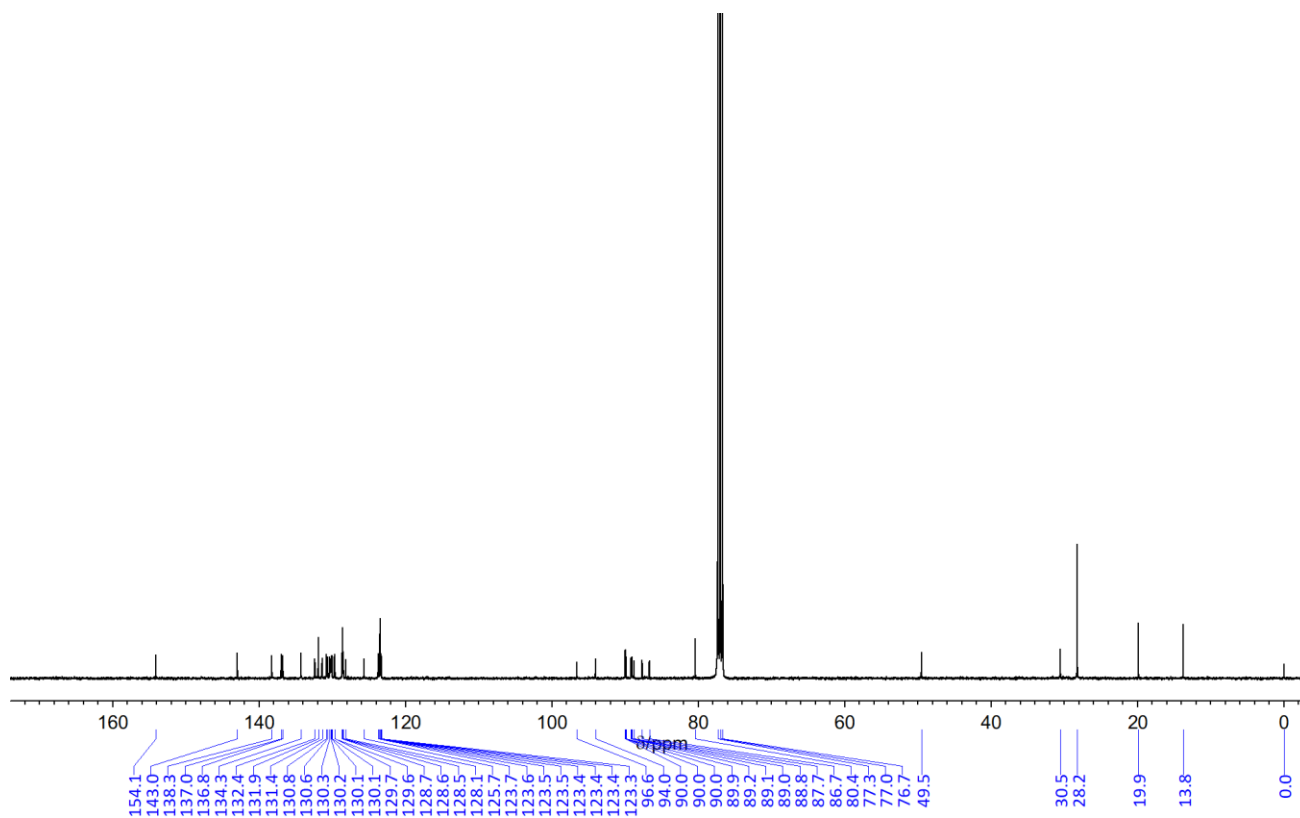

$^{13}\text{C}$  NMR spectrum (100 MHz) of **10** (11PAM), measured in chloroform-*d* at room temperature.

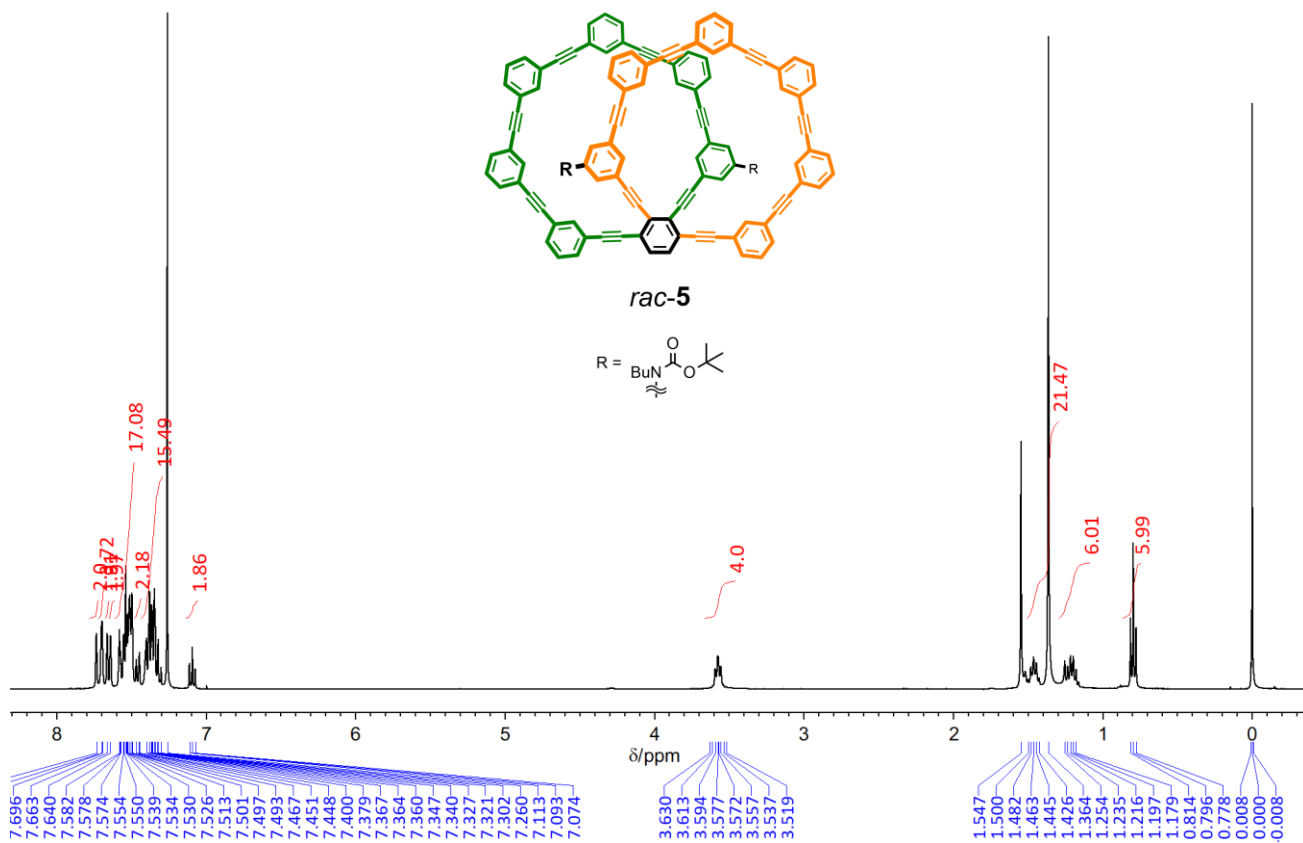

<sup>1</sup>H NMR spectrum (400 MHz) of *rac-5* (13PAM), measured in chloroform-*d* at room temperature.

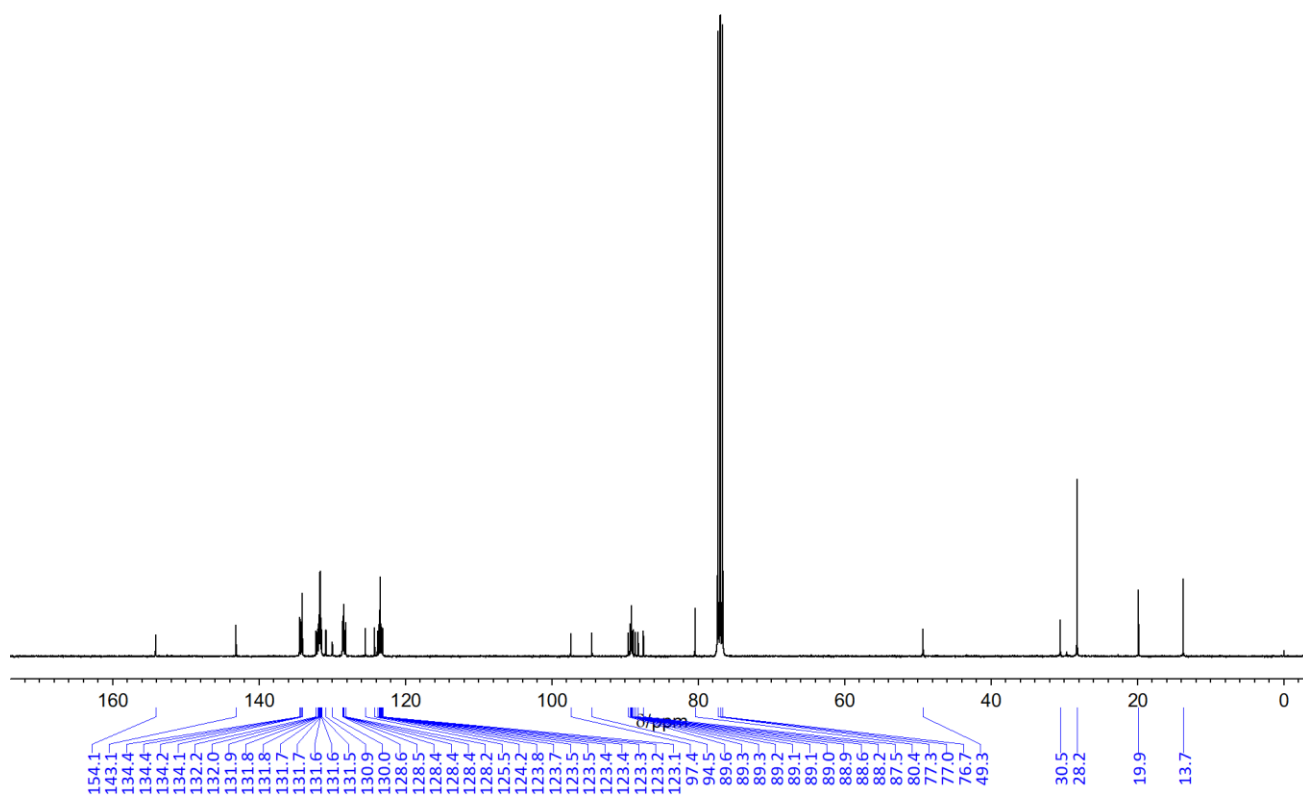

<sup>13</sup>C NMR spectrum (100 MHz) of *rac-5* (13PAM), measured in chloroform-*d* at room temperature.



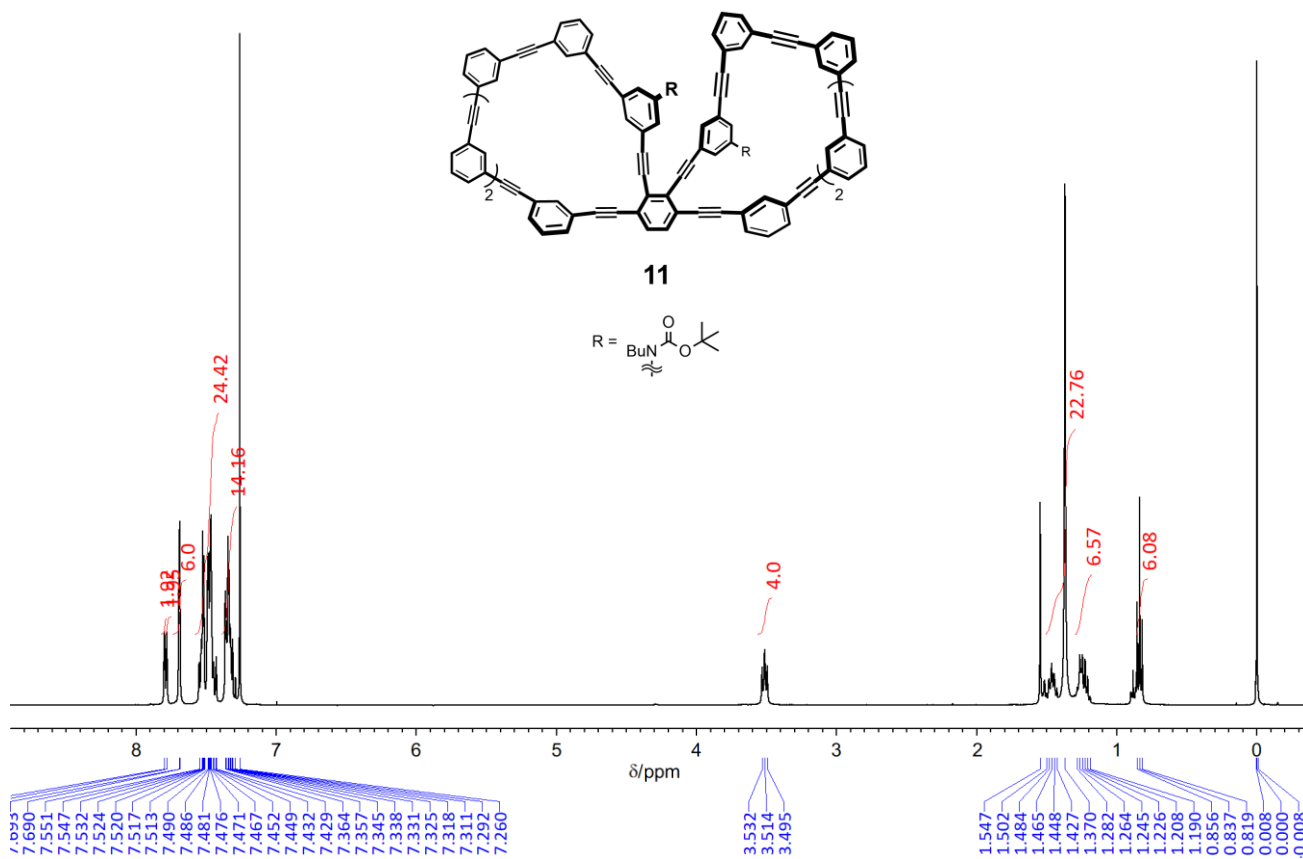

<sup>1</sup>H NMR spectrum (400 MHz) of **11** (13PAM), cont. residual hexane, measured in chloroform-*d* at room temperature.

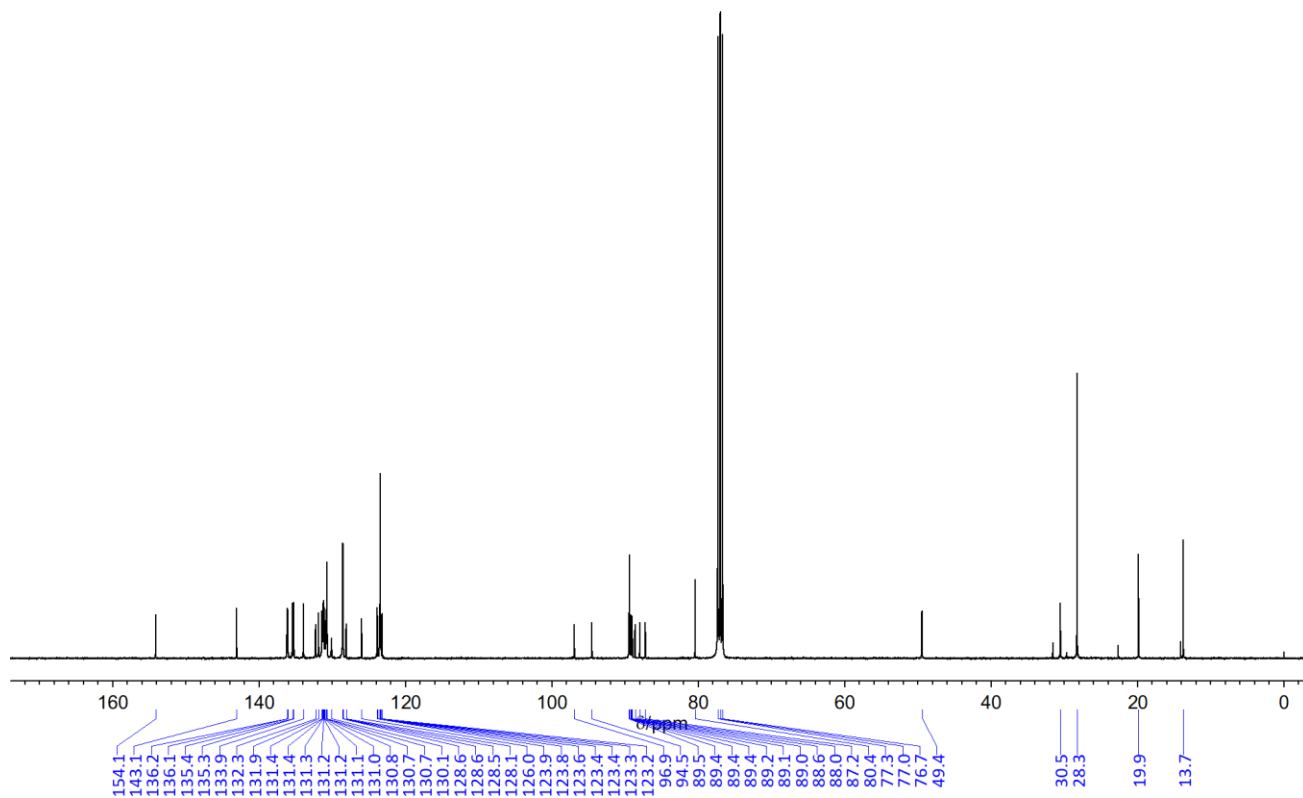

<sup>13</sup>C NMR spectrum (100 MHz) of **11** (13PAM), cont. residual hexane, measured in chloroform-*d* at room temperature.

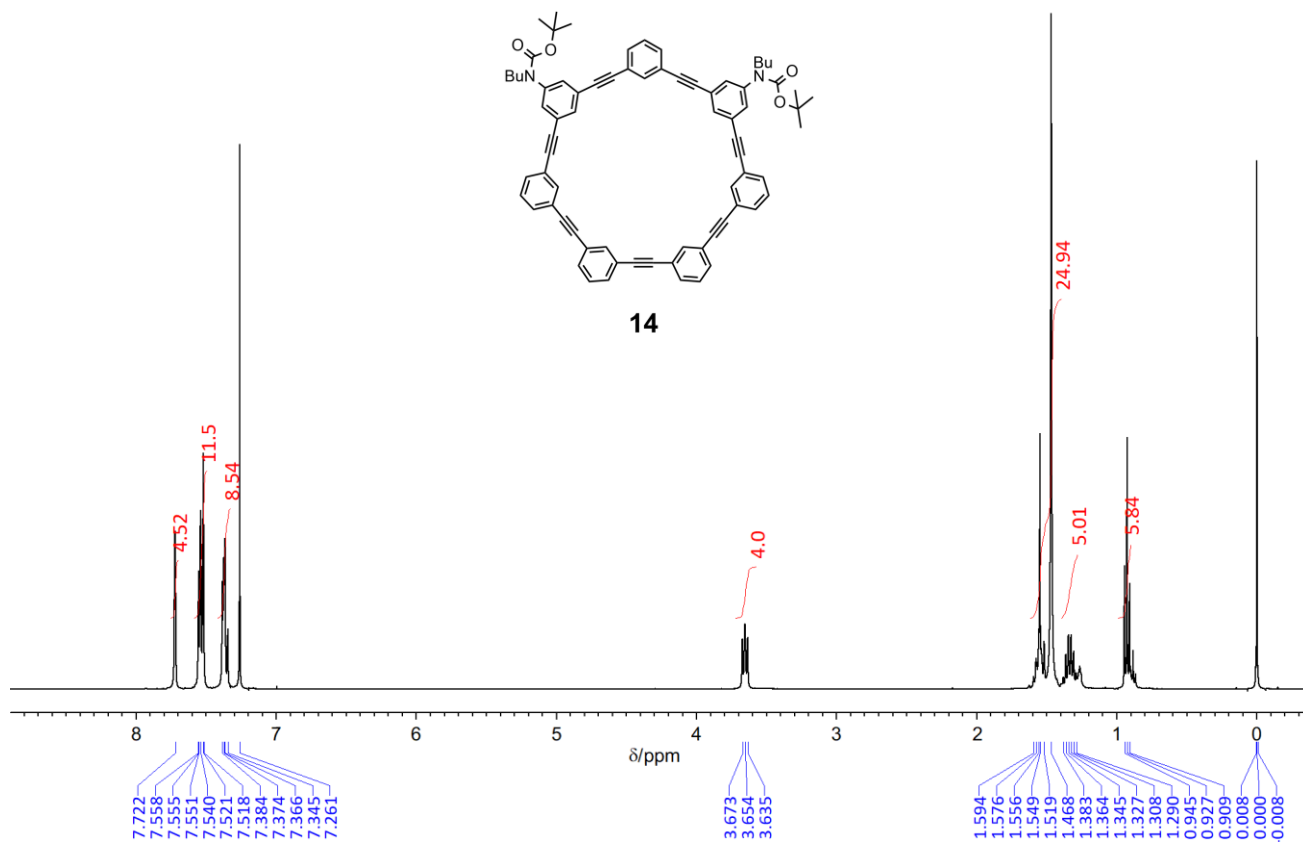

$^1\text{H}$  NMR spectrum (400 MHz) of **14** (7PAM), cont. residual hexane, measured in chloroform-*d* at room temperature.

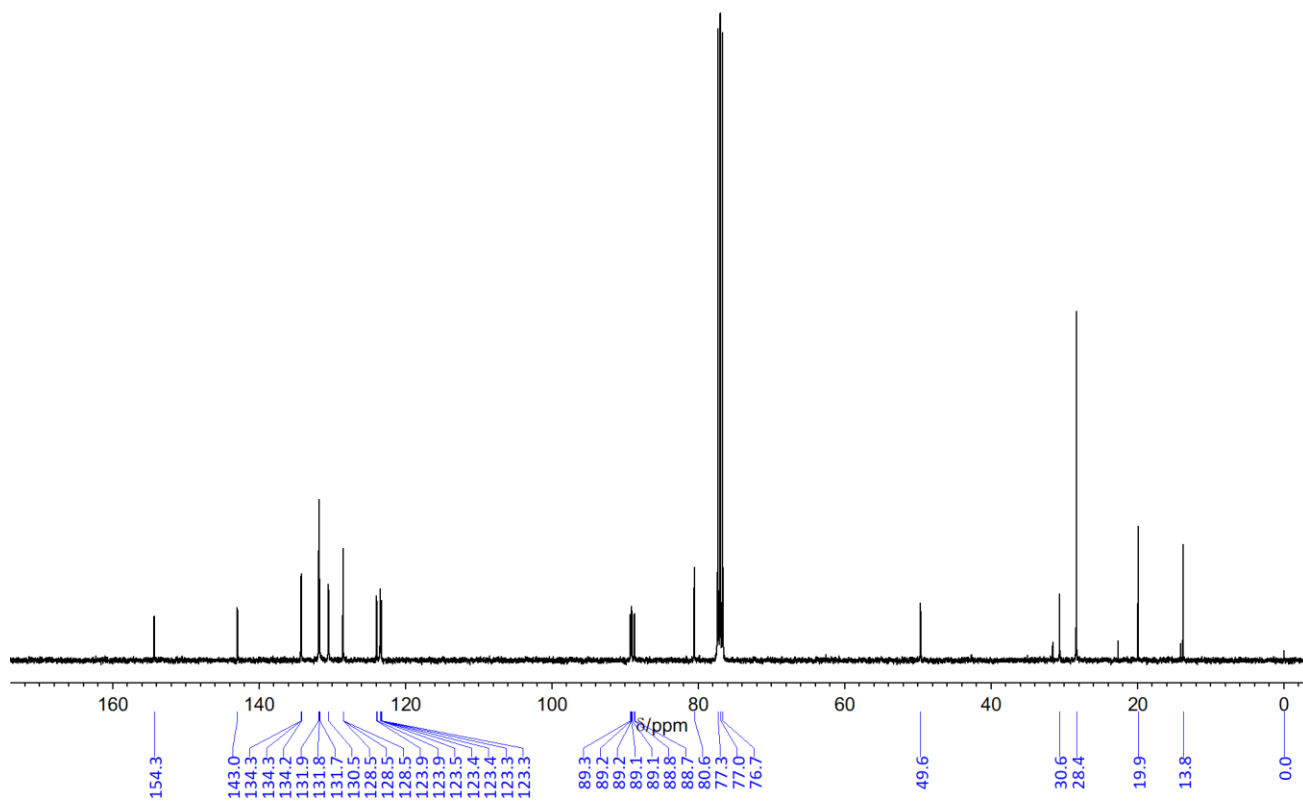

$^{13}\text{C}$  NMR spectrum (100 MHz) of **14** (7PAM), cont. residual hexane, measured in chloroform-*d* at room temperature.

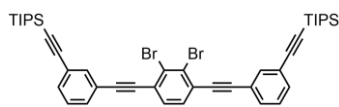

**16**

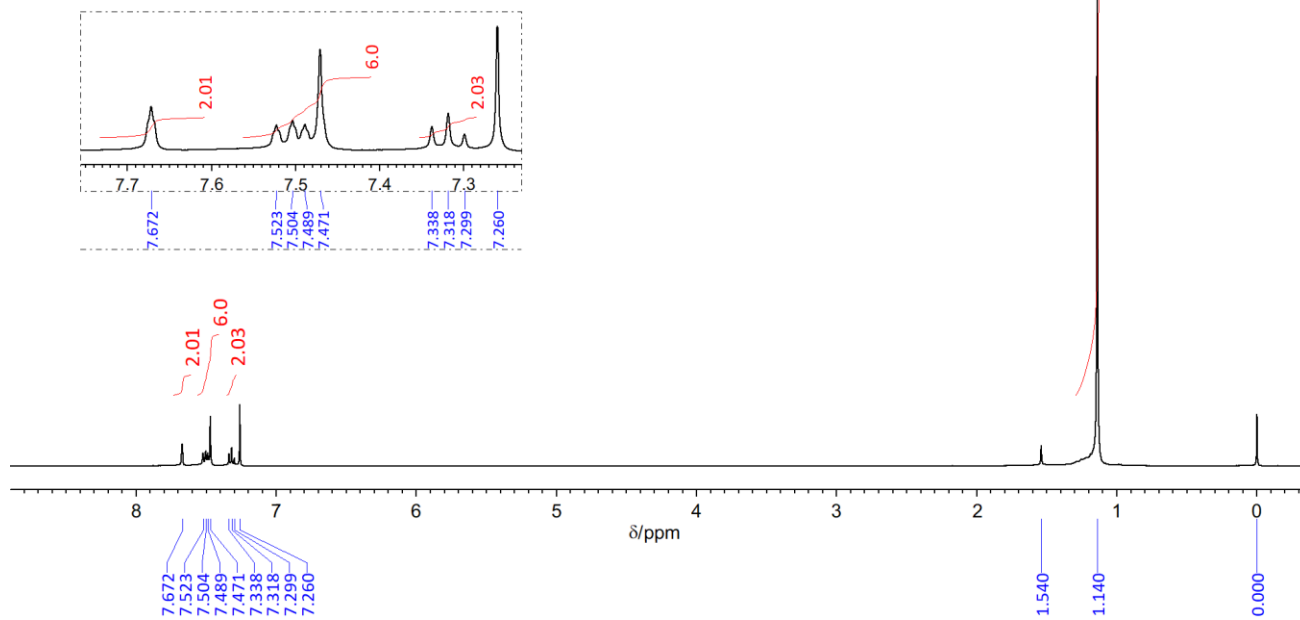

$^1\text{H}$  NMR spectrum (400 MHz) of **16**, measured in chloroform-*d* at room temperature.

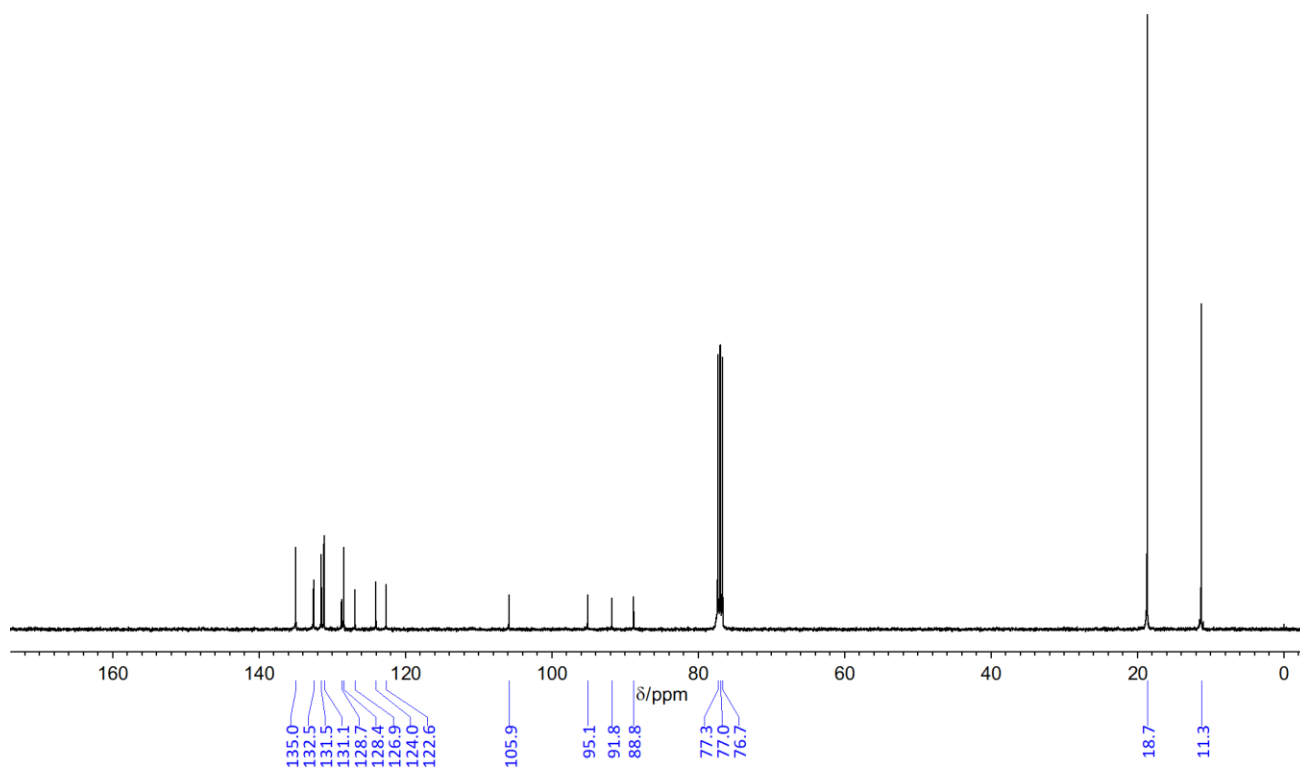

$^{13}\text{C}$  NMR spectrum (100 MHz) of **16**, measured in chloroform-*d* at room temperature.

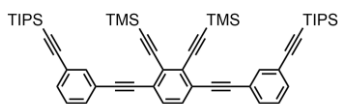

**17**

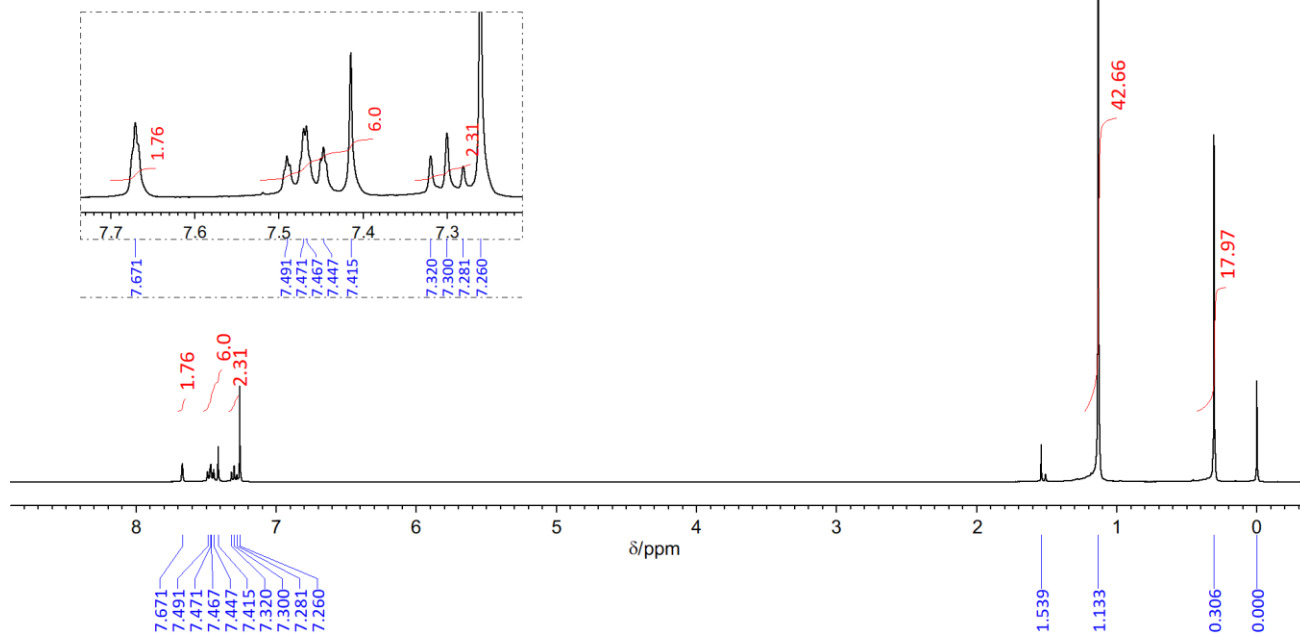

$^1\text{H}$  NMR spectrum (400 MHz) of **17**, measured in chloroform-*d* at room temperature.

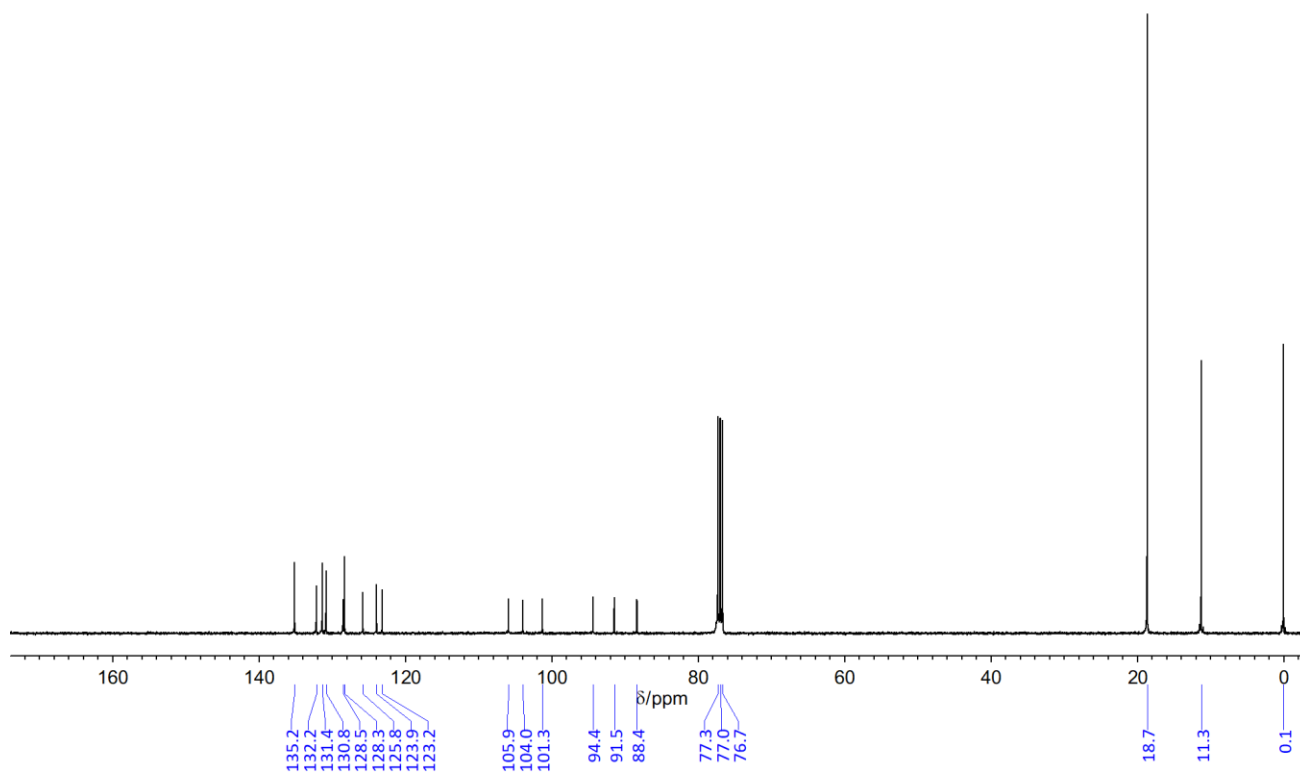

$^{13}\text{C}$  NMR spectrum (100 MHz) of **17**, measured in chloroform-*d* at room temperature.

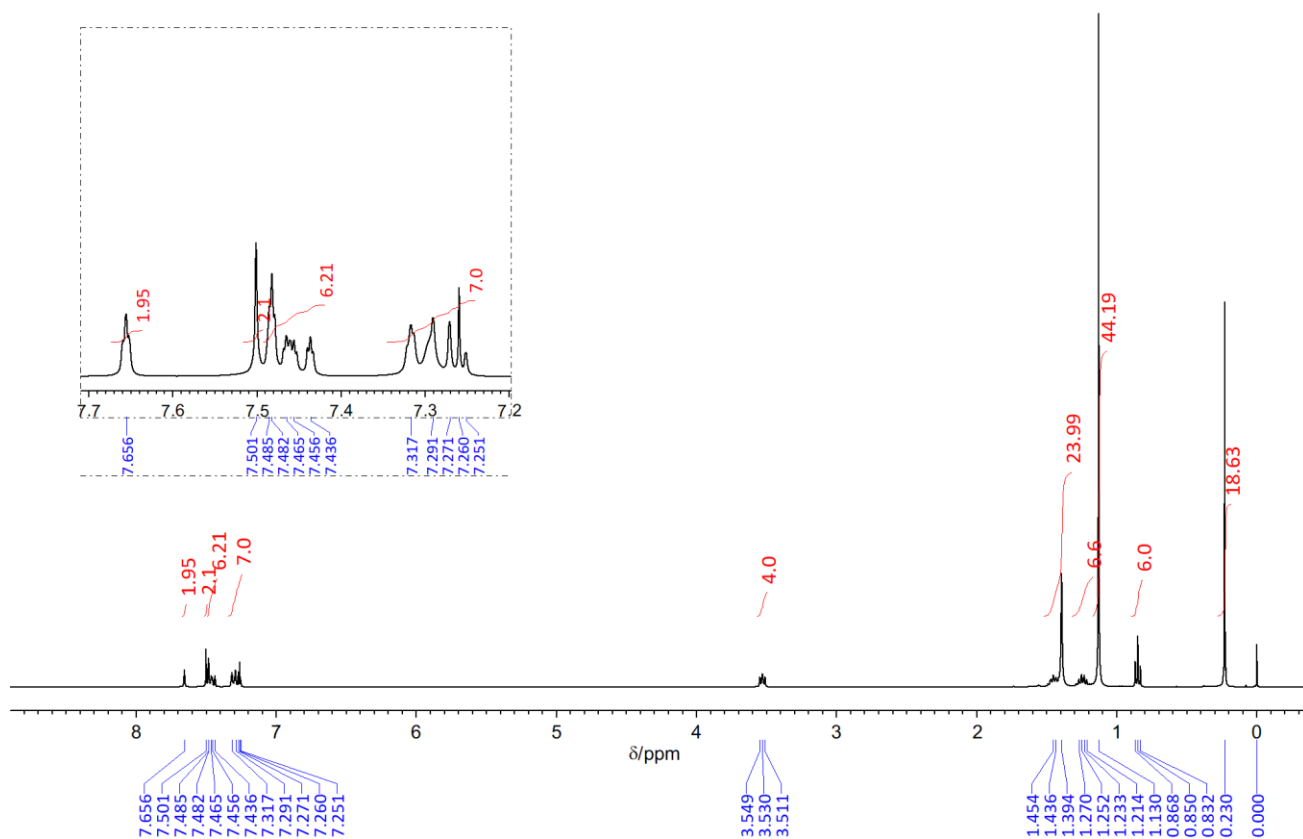

$^1\text{H}$  NMR spectrum (400 MHz) of **18**, measured in chloroform- $d$  at room temperature.

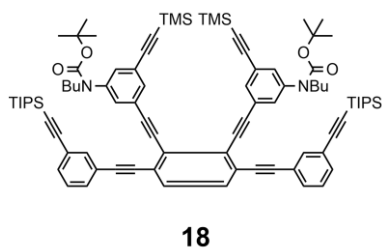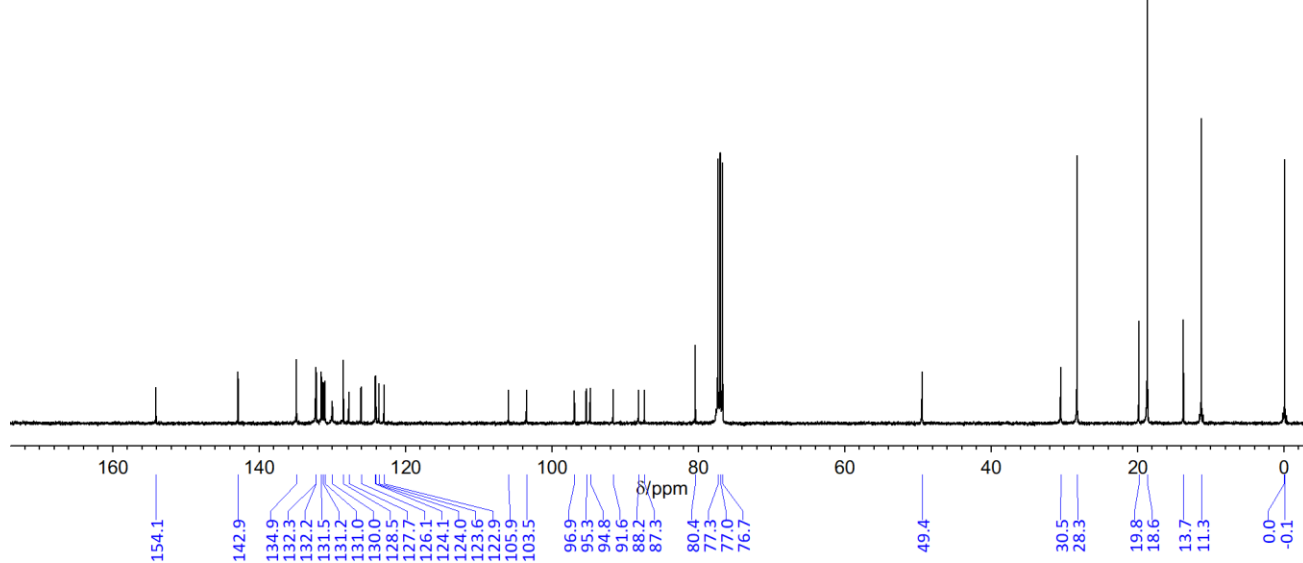

$^{13}\text{C}$  NMR spectrum (100 MHz) of **18**, measured in chloroform- $d$  at room temperature.

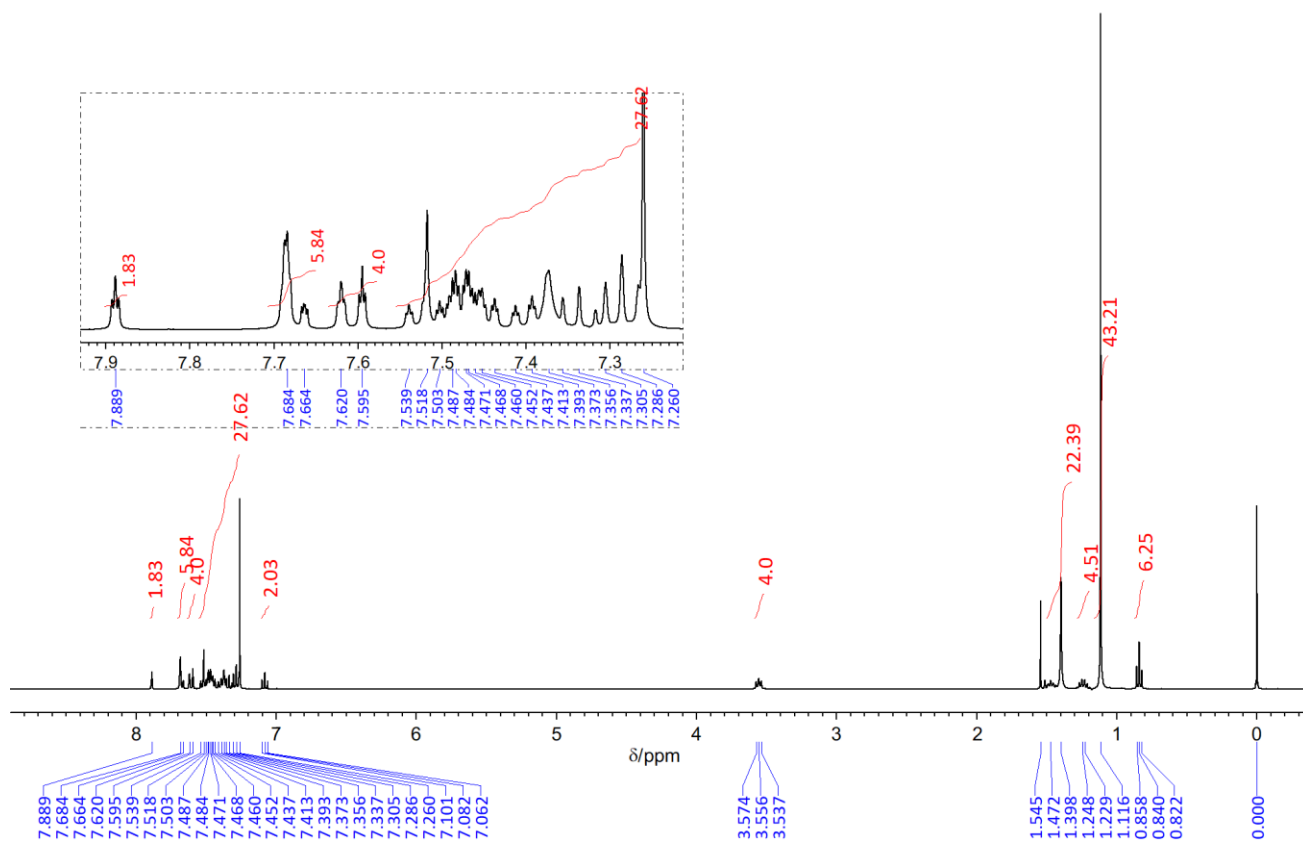

<sup>1</sup>H NMR spectrum (400 MHz) of **19**, measured in chloroform-*d* at room temperature.

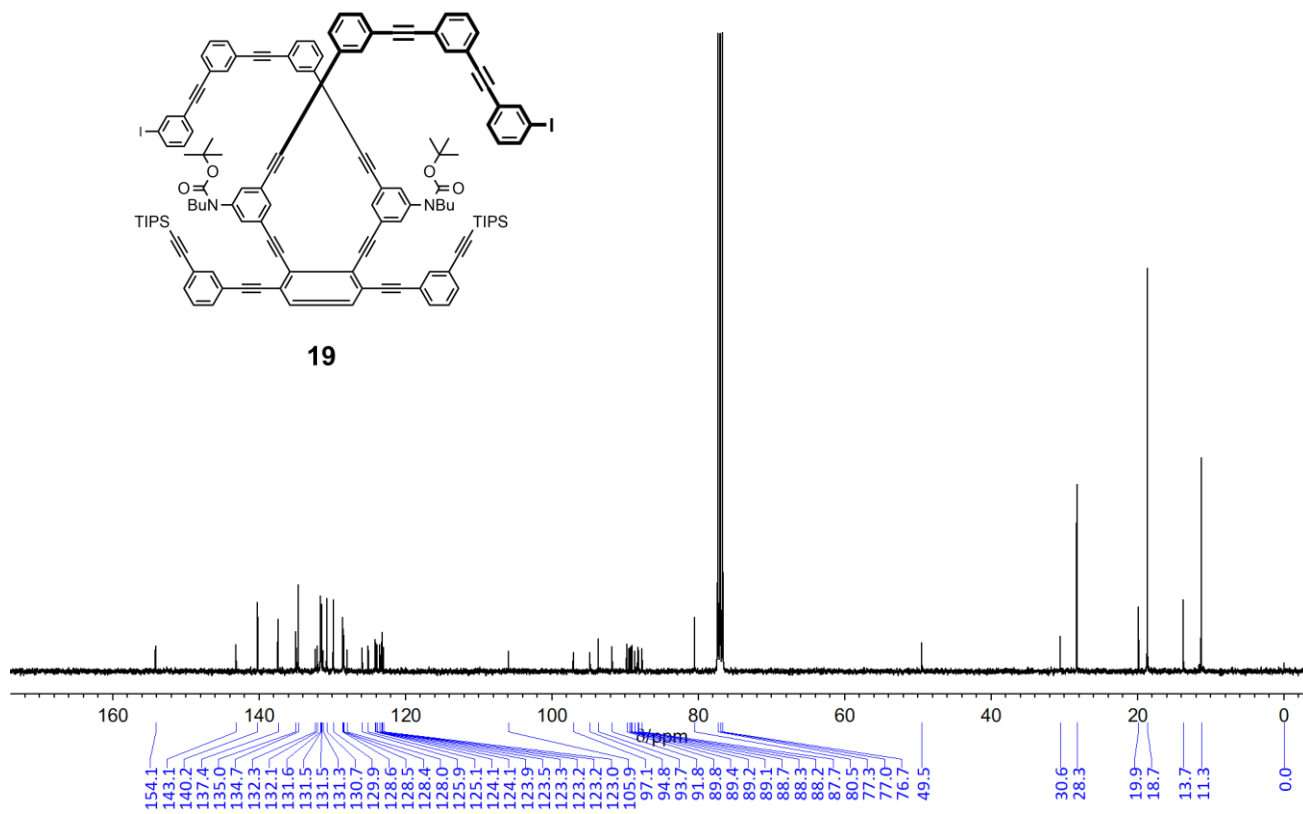

<sup>13</sup>C NMR spectrum (100 MHz) of **19**, measured in chloroform-*d* at room temperature.

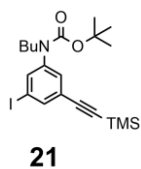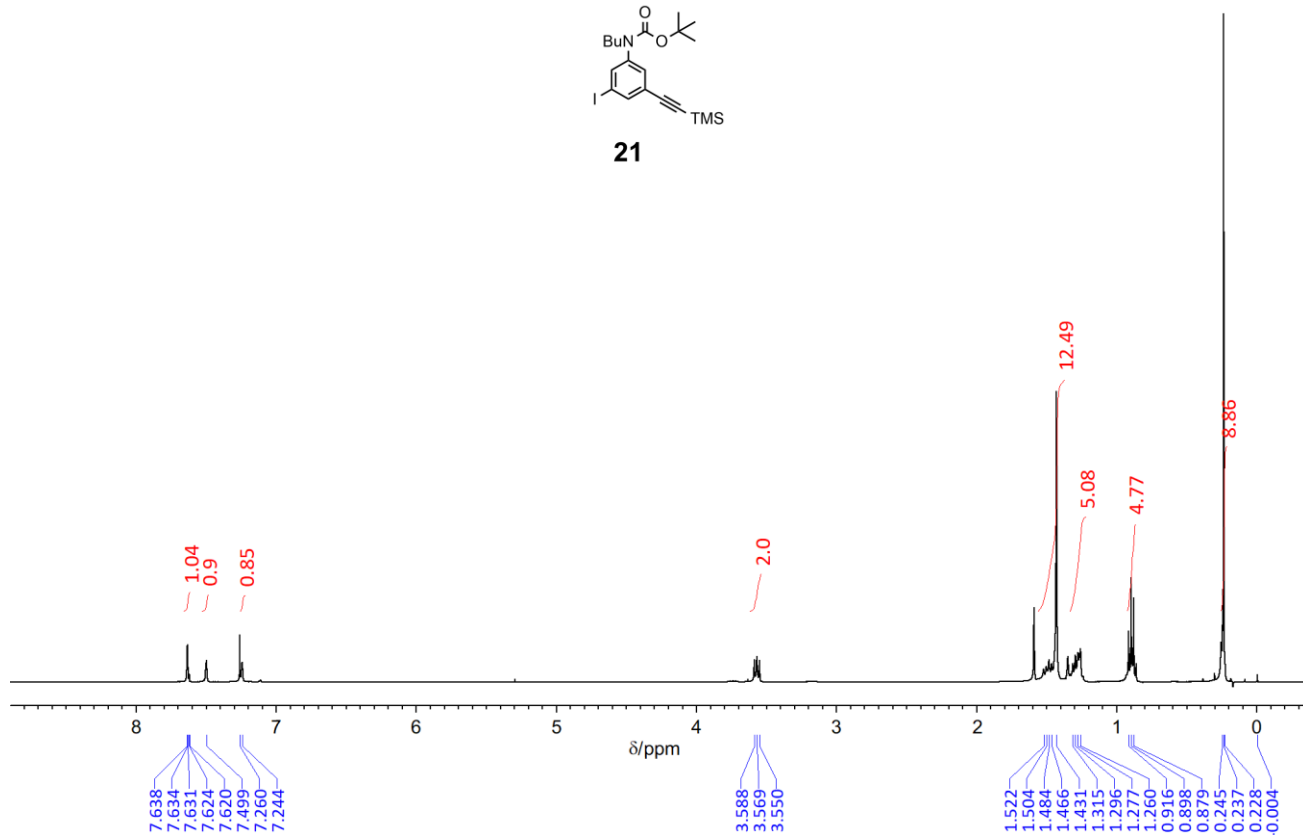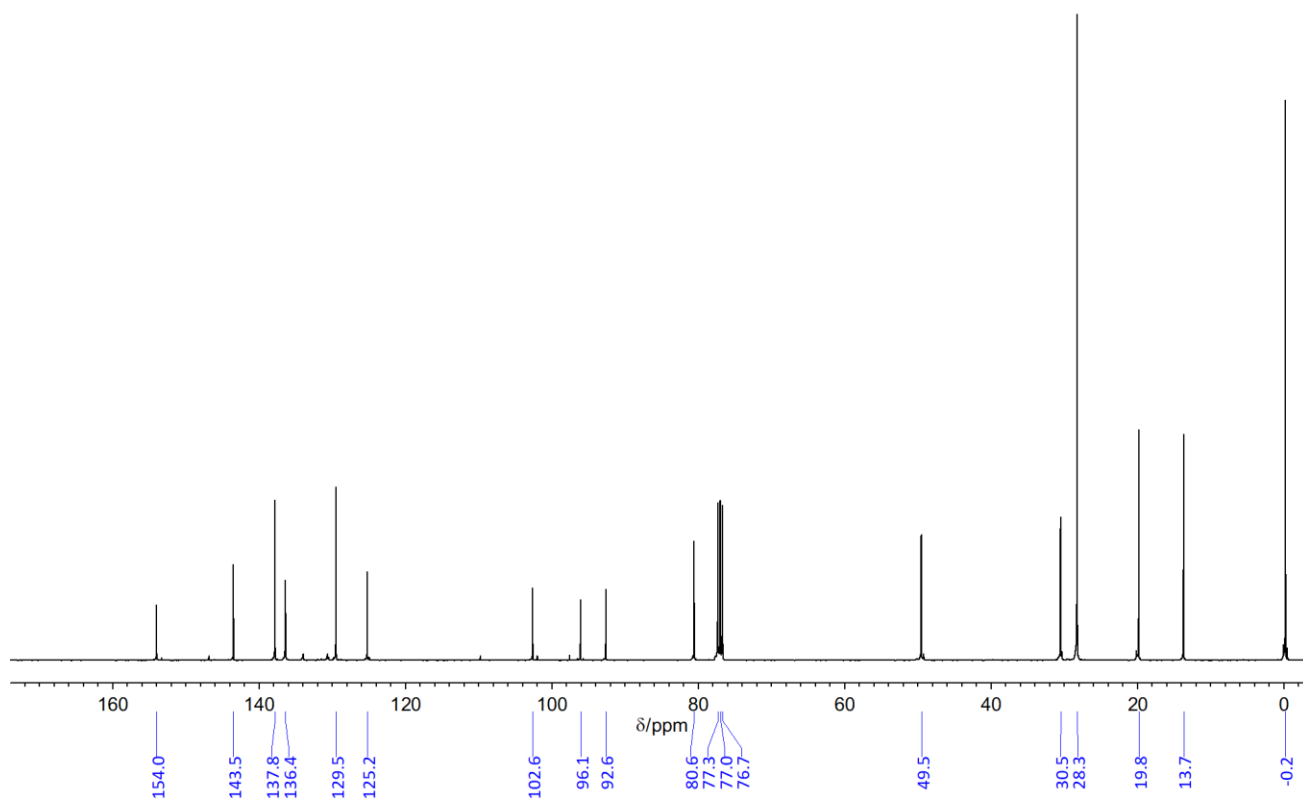

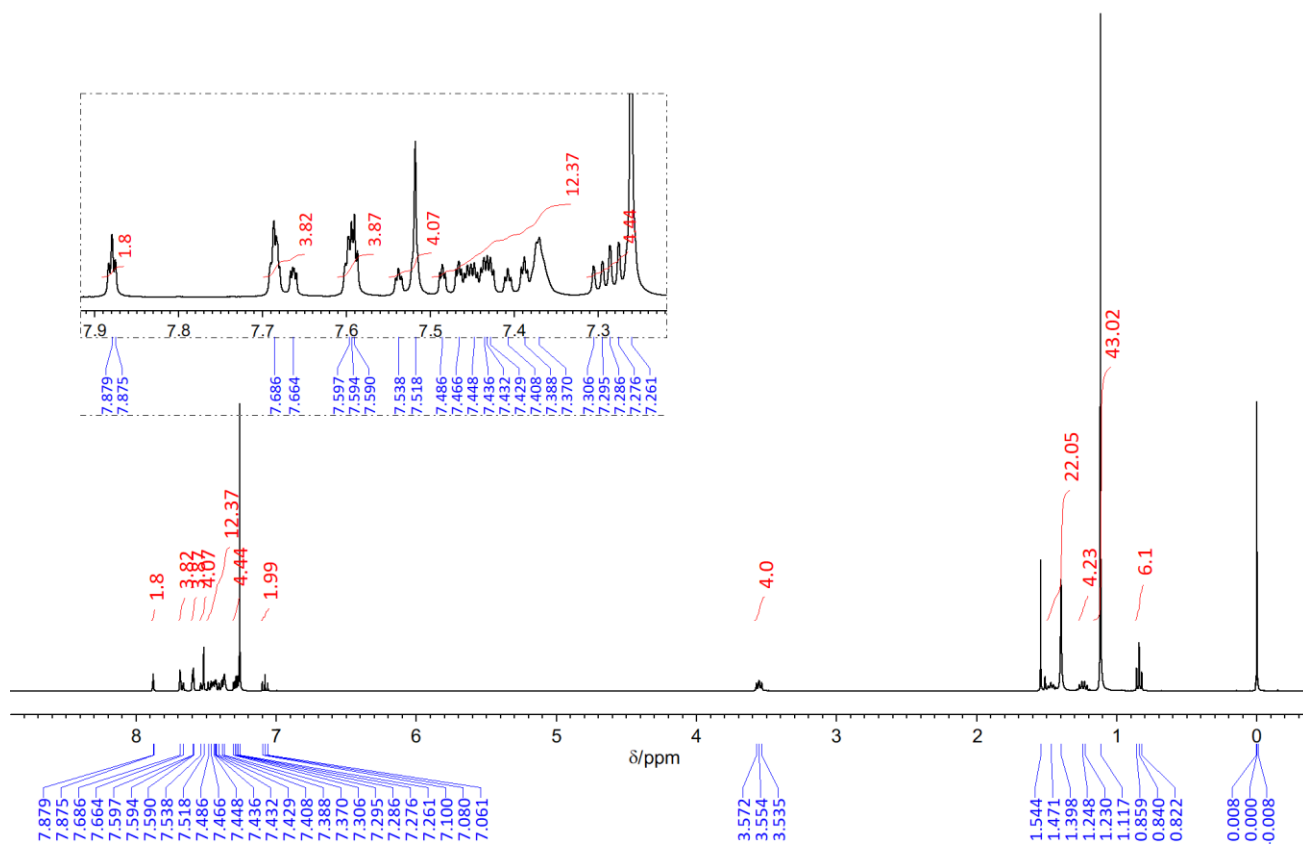

<sup>1</sup>H NMR spectrum (400 MHz) of 24, measured in chloroform-*d* at room temperature.

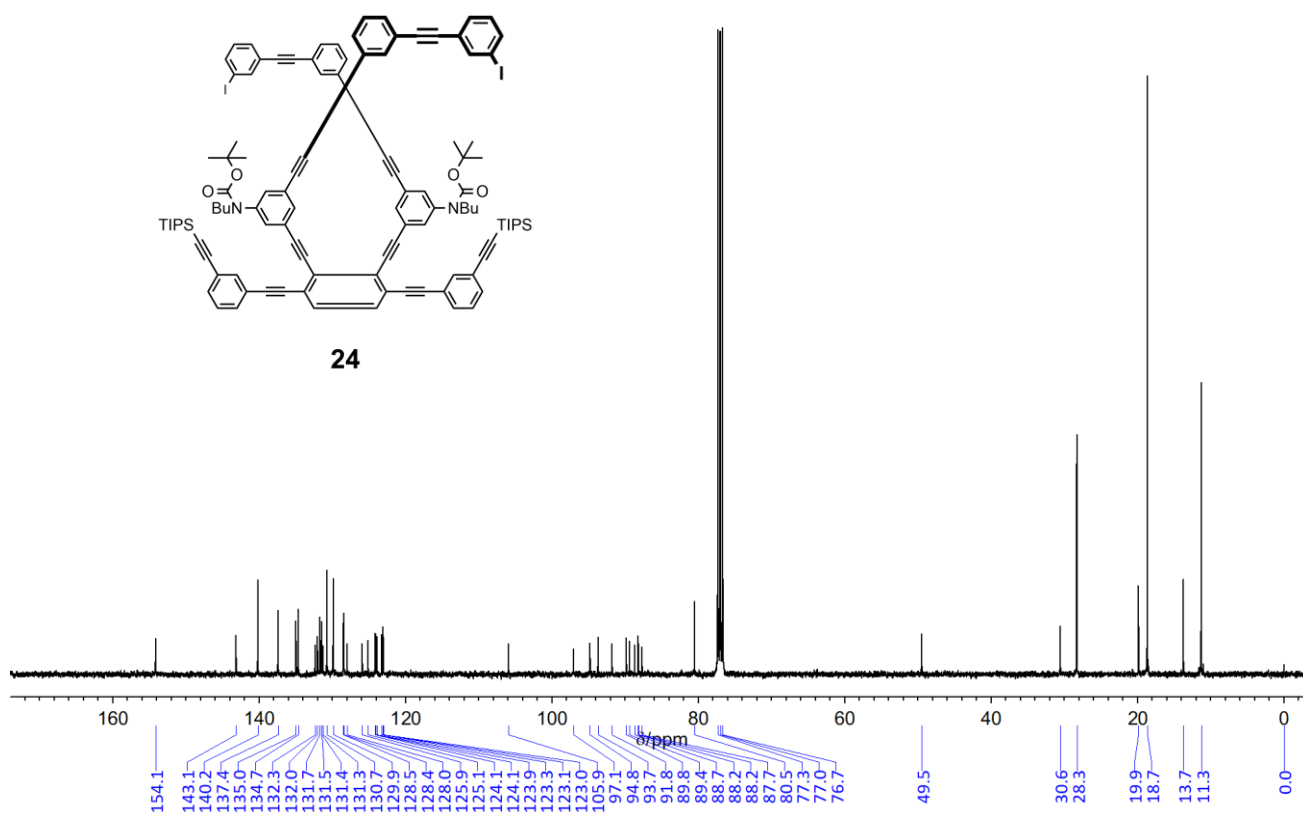

<sup>13</sup>C NMR spectrum (100 MHz) of 24, measured in chloroform-*d* at room temperature.



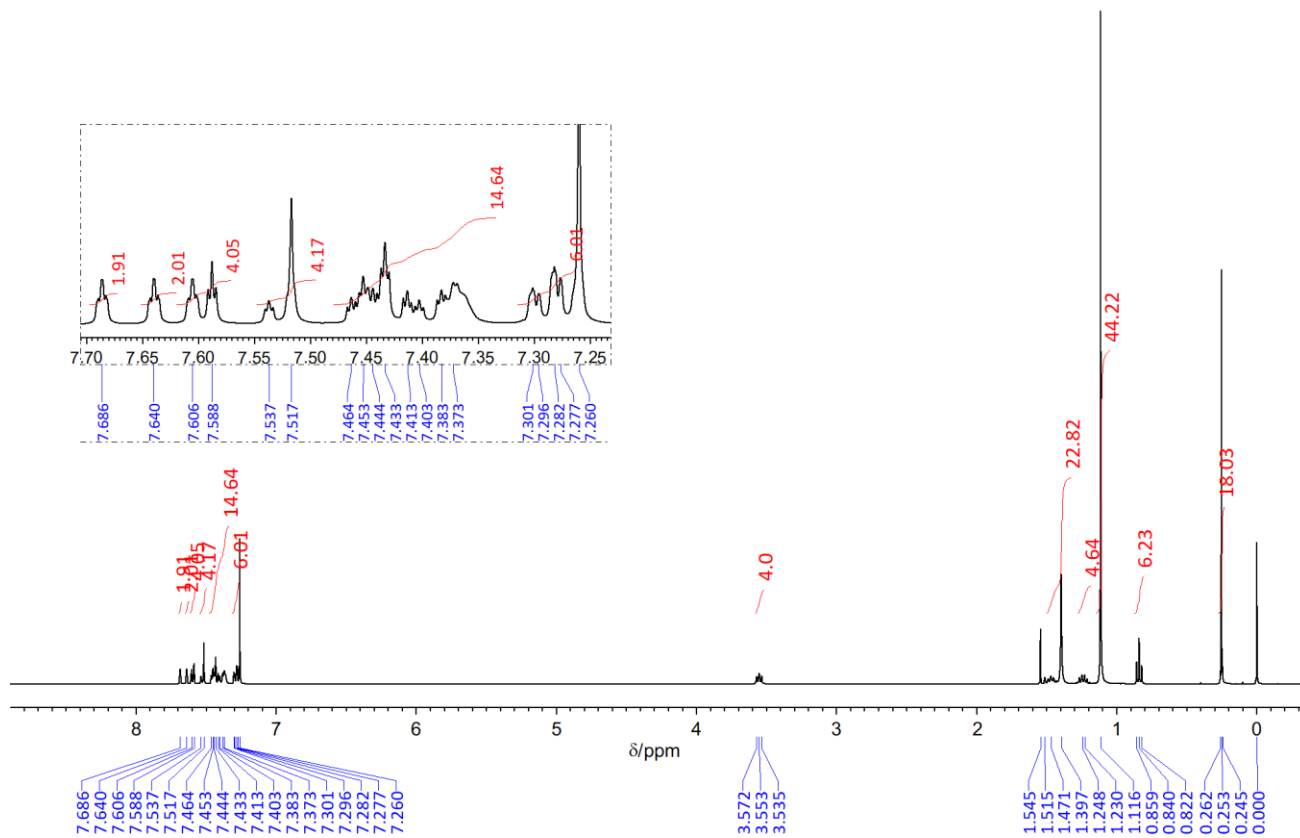

<sup>1</sup>H NMR spectrum (400 MHz) of 25, measured in chloroform-*d* at room temperature.

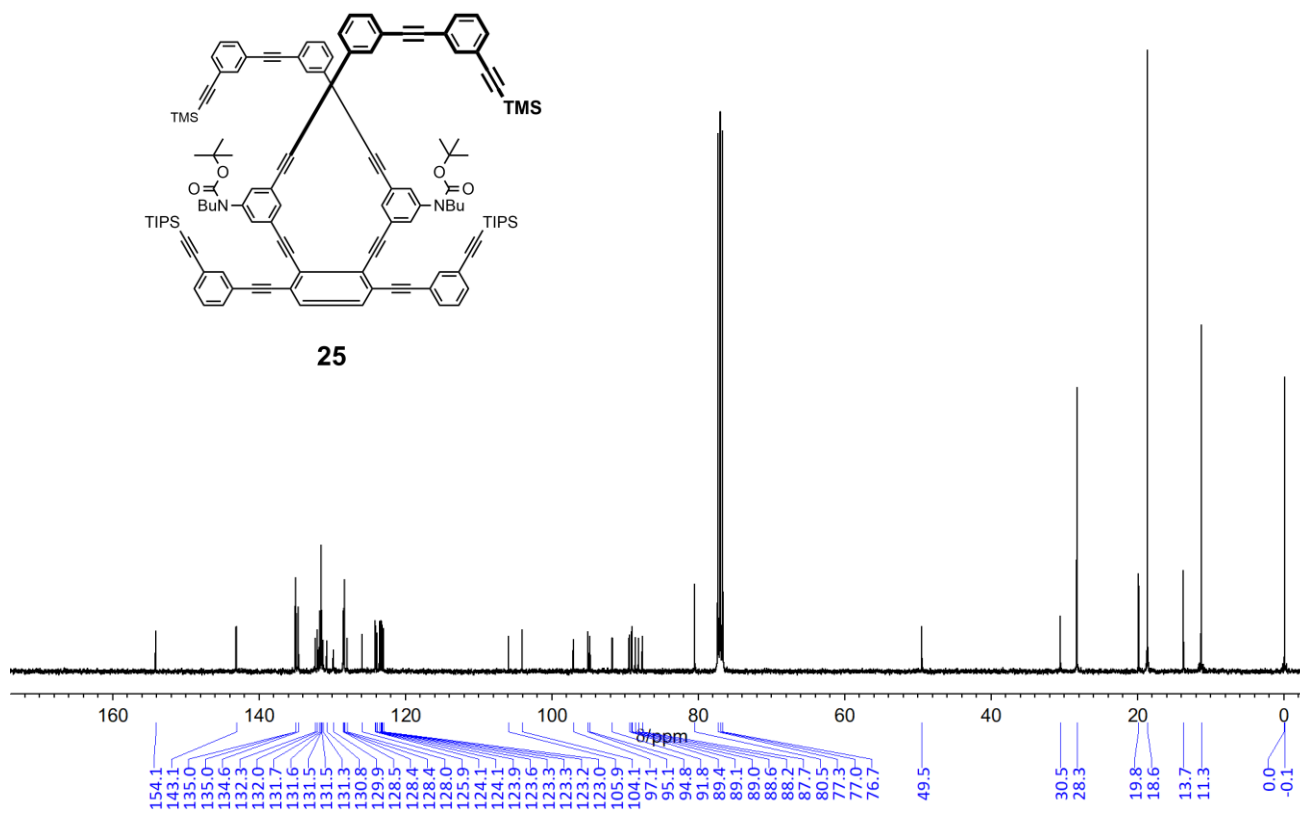

<sup>13</sup>C NMR spectrum (100 MHz) of 25, measured in chloroform-*d* at room temperature.

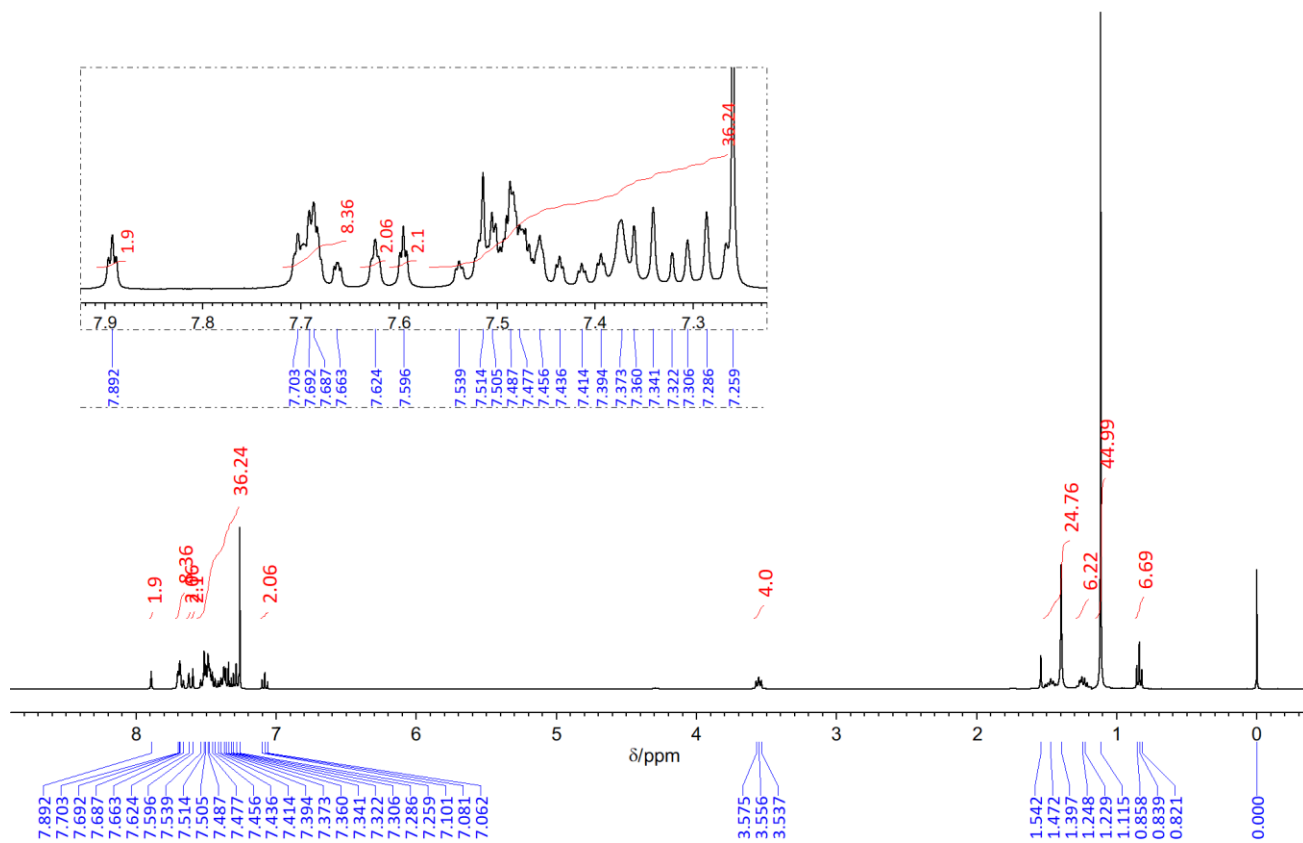

<sup>1</sup>H NMR spectrum (400 MHz) of **26**, measured in chloroform-*d* at room temperature.

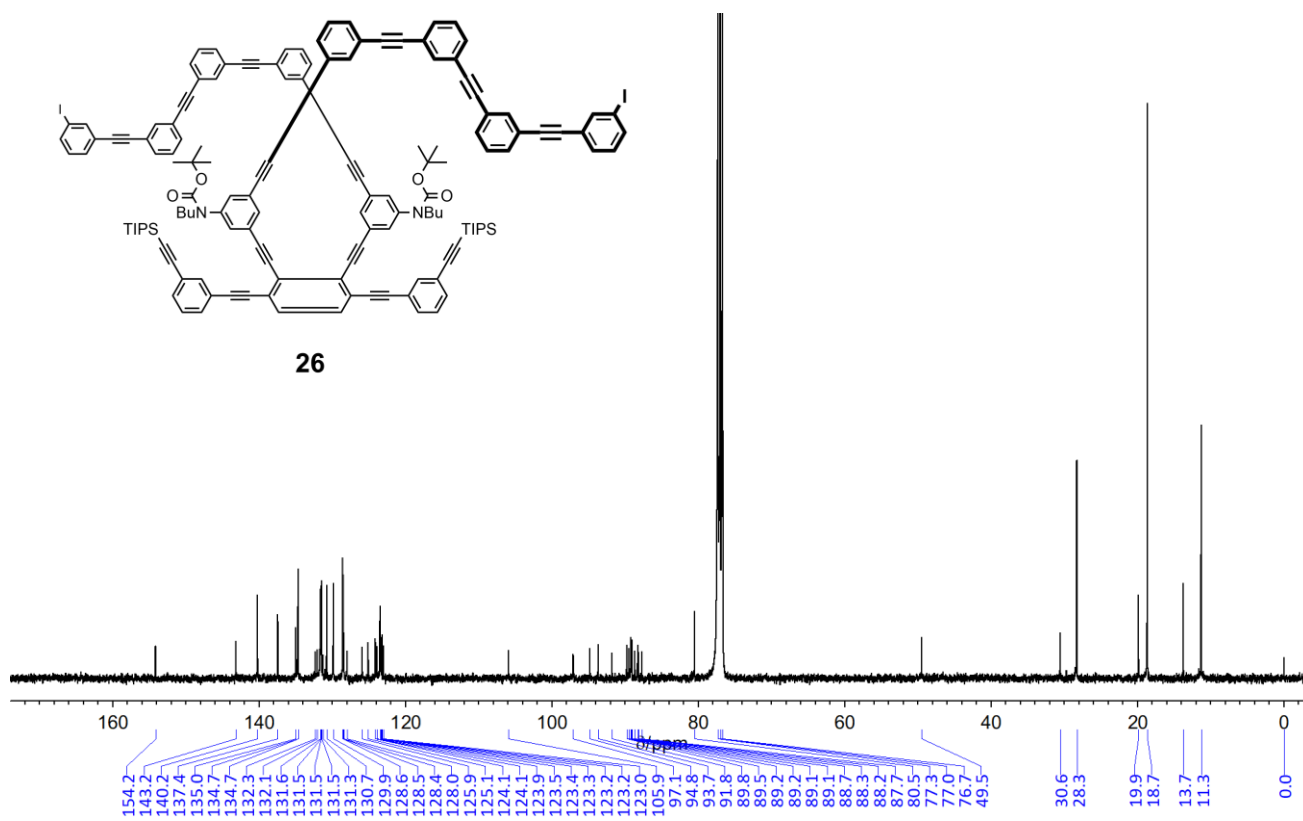

<sup>13</sup>C NMR spectrum (100 MHz) of **26**, measured in chloroform-*d* at room temperature.

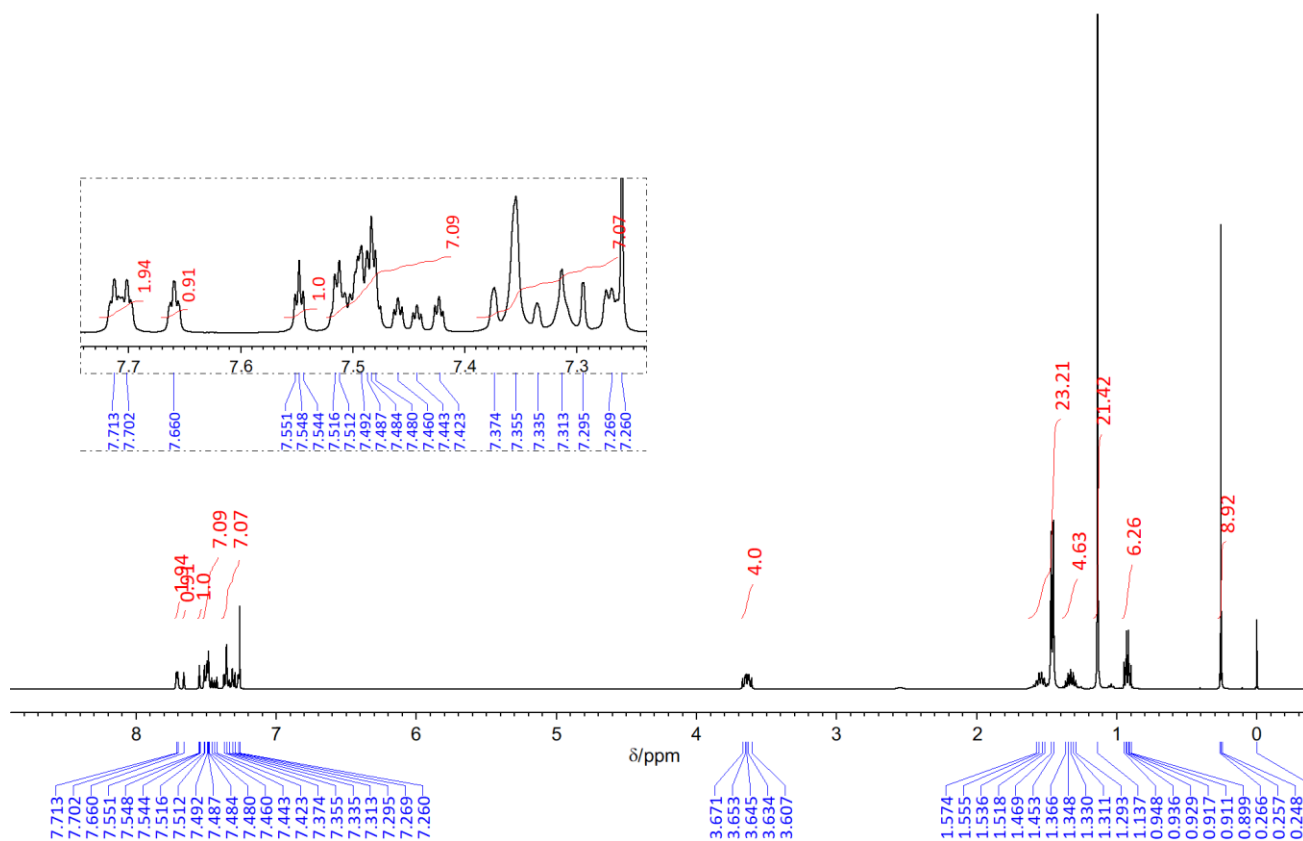

<sup>1</sup>H NMR spectrum (400 MHz) of **29**, measured in chloroform-*d* at room temperature.

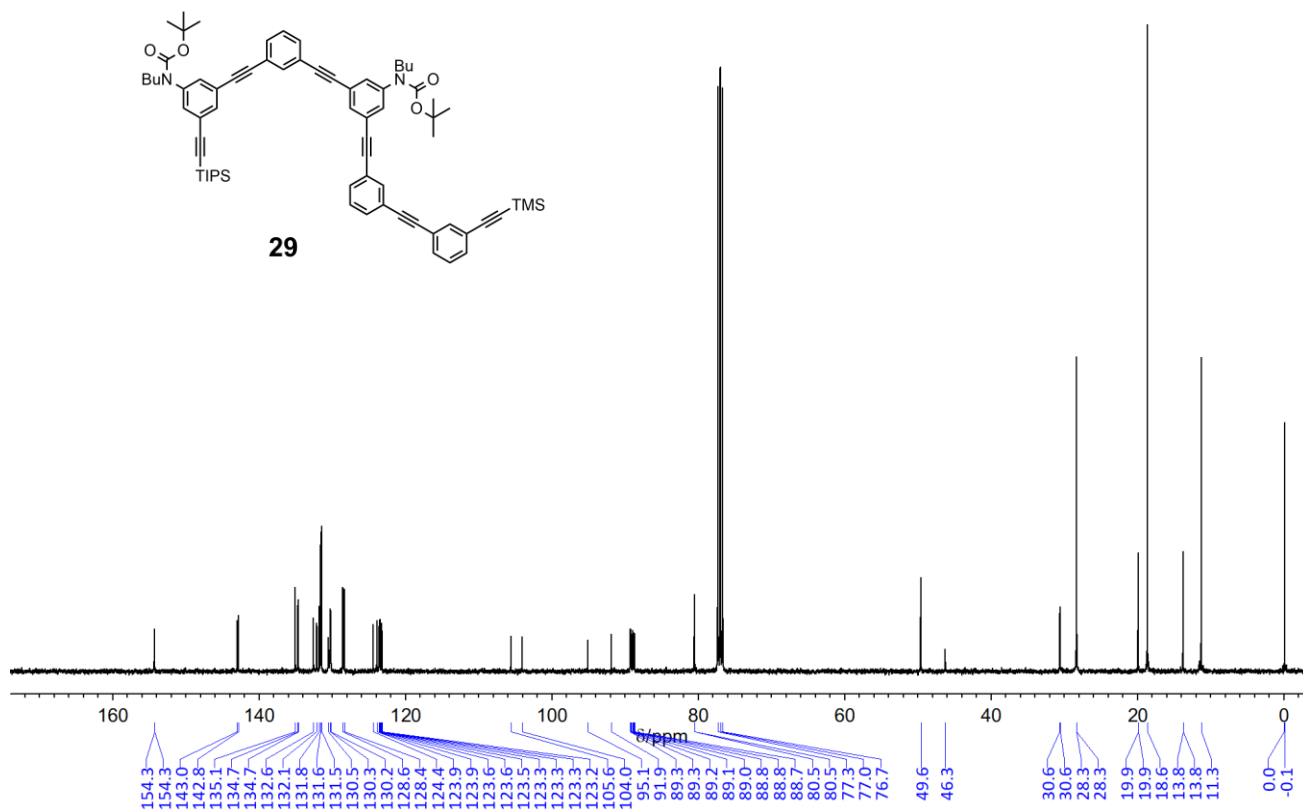

<sup>13</sup>C NMR spectrum (100 MHz) of **29**, measured in chloroform-*d* at room temperature.

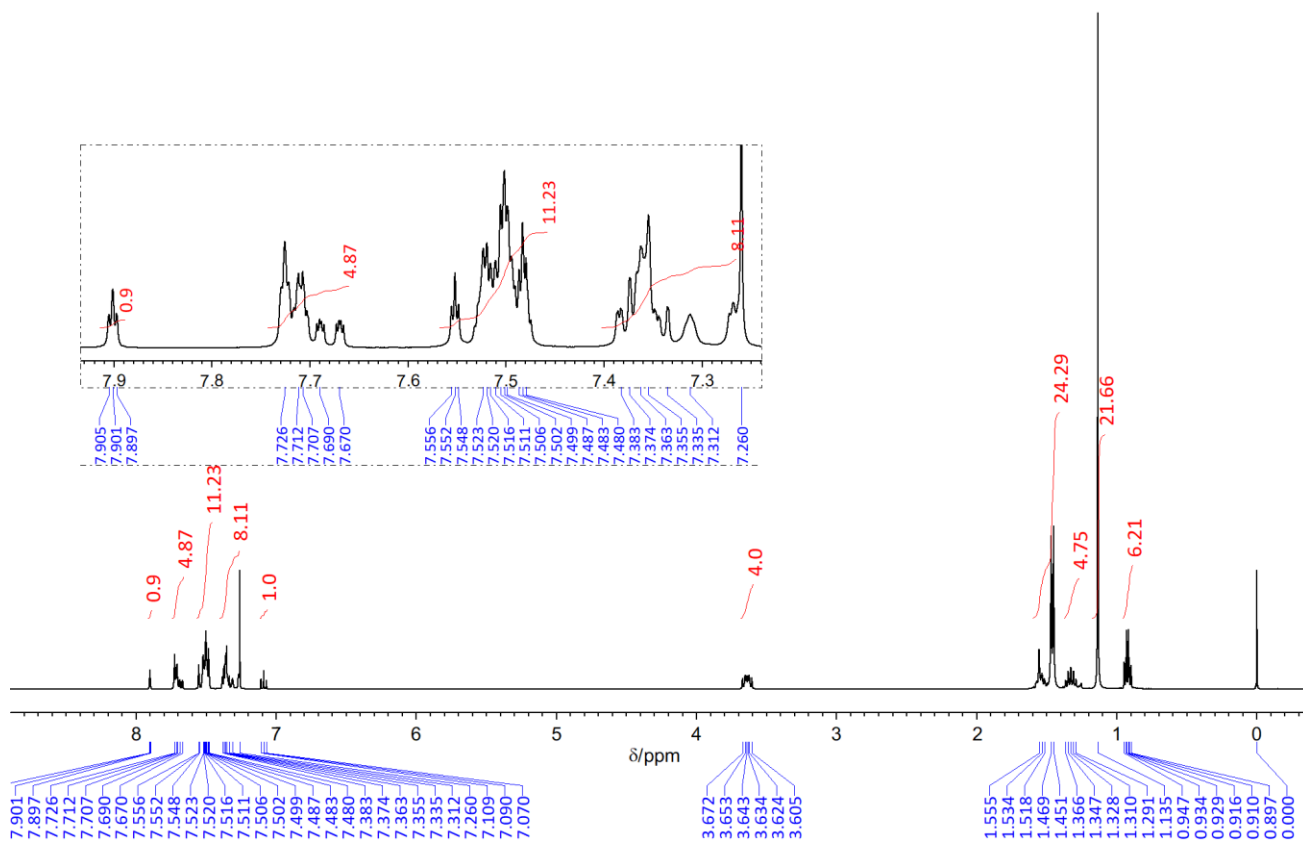

$^1\text{H}$  NMR spectrum (400 MHz) of **30**, measured in chloroform-*d* at room temperature.

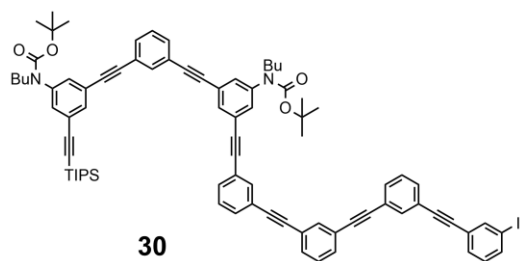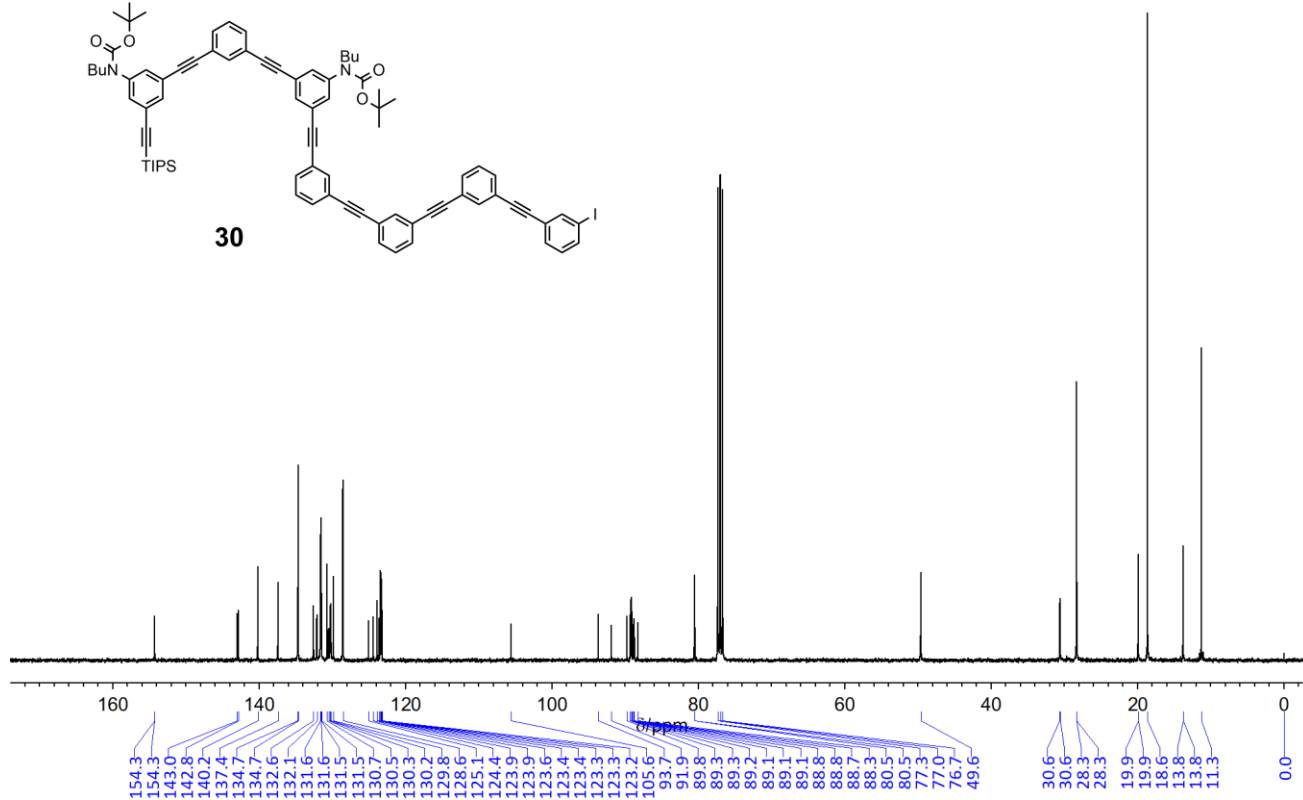

$^{13}\text{C}$  NMR spectrum (100 MHz) of **30**, measured in chloroform-*d* at room temperature.

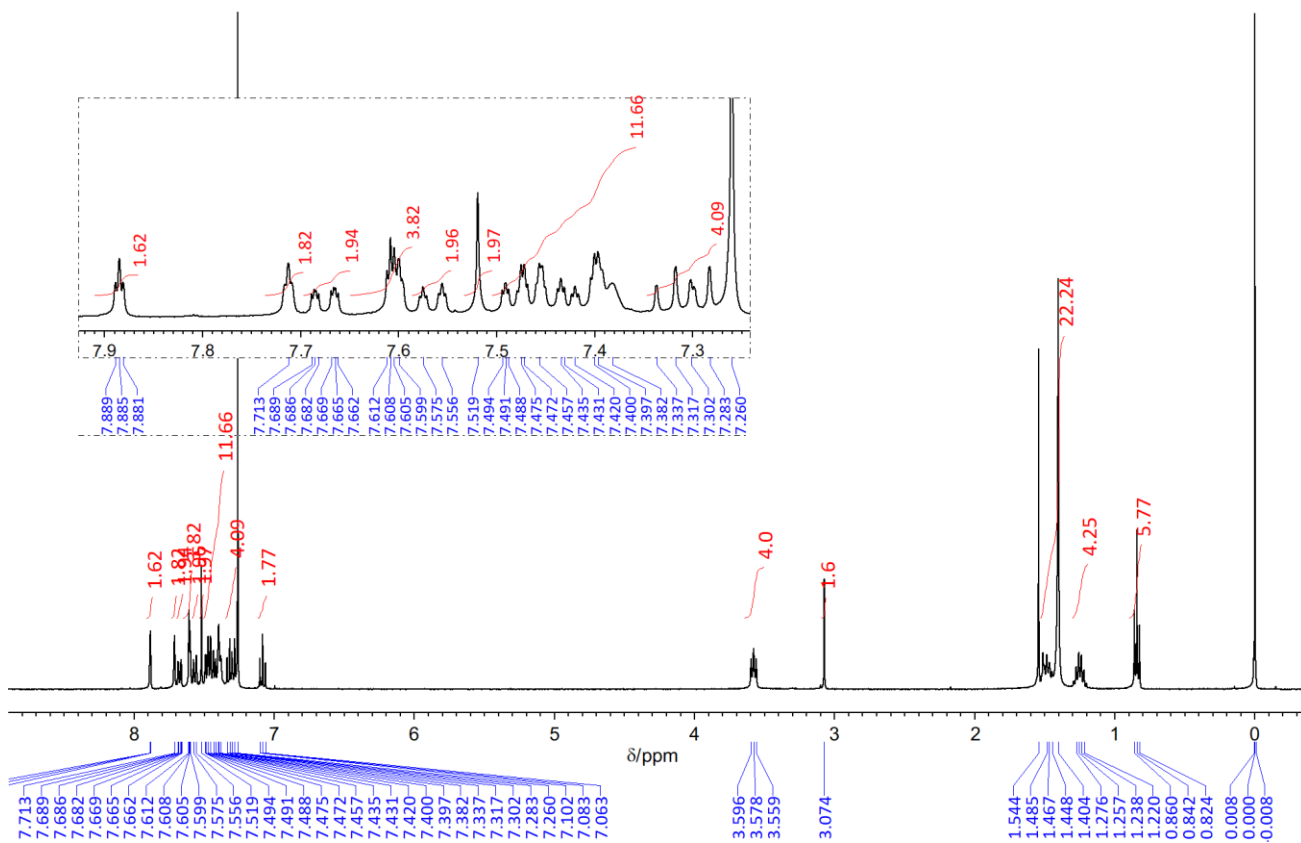

$^1\text{H}$  NMR spectrum (400 MHz) of **6**, measured in chloroform-*d* at room temperature.

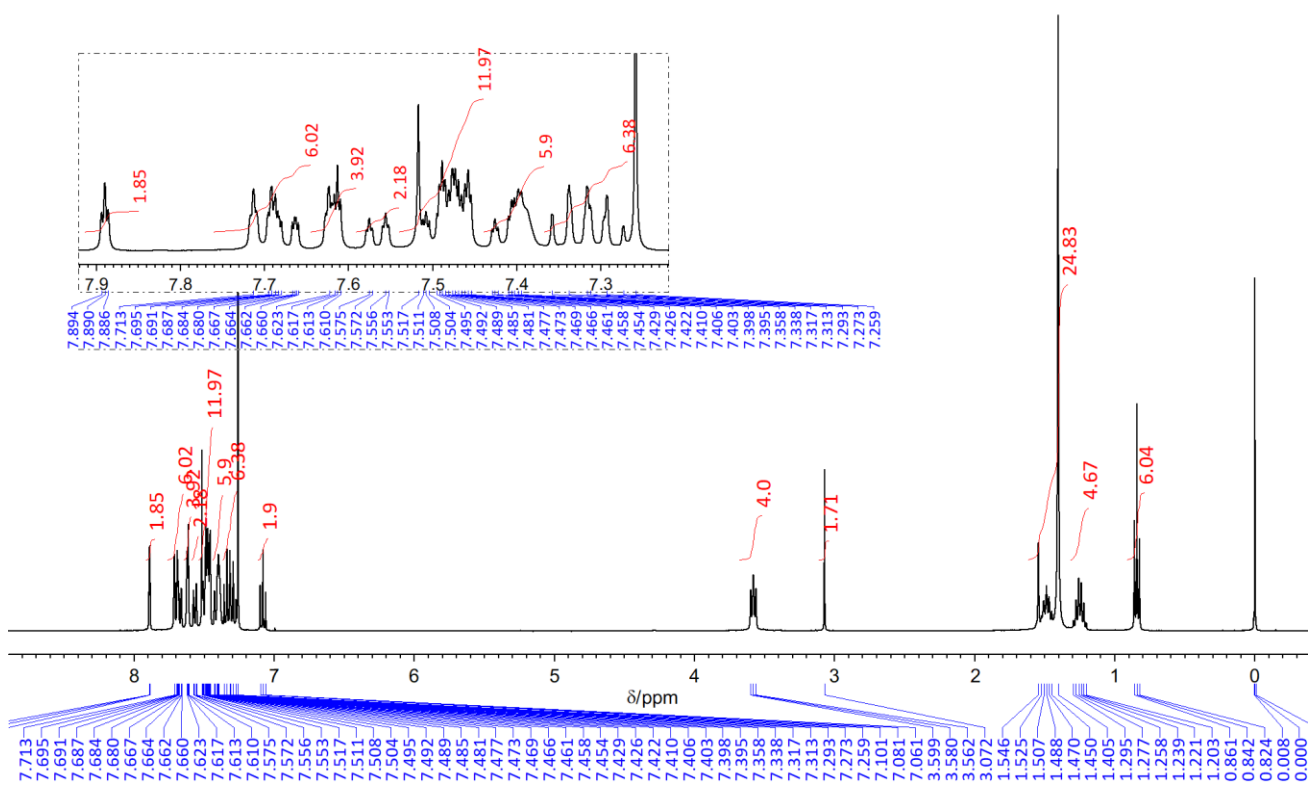

$^1\text{H}$  NMR spectrum (400 MHz) of **7**, measured in chloroform-*d* at room temperature.

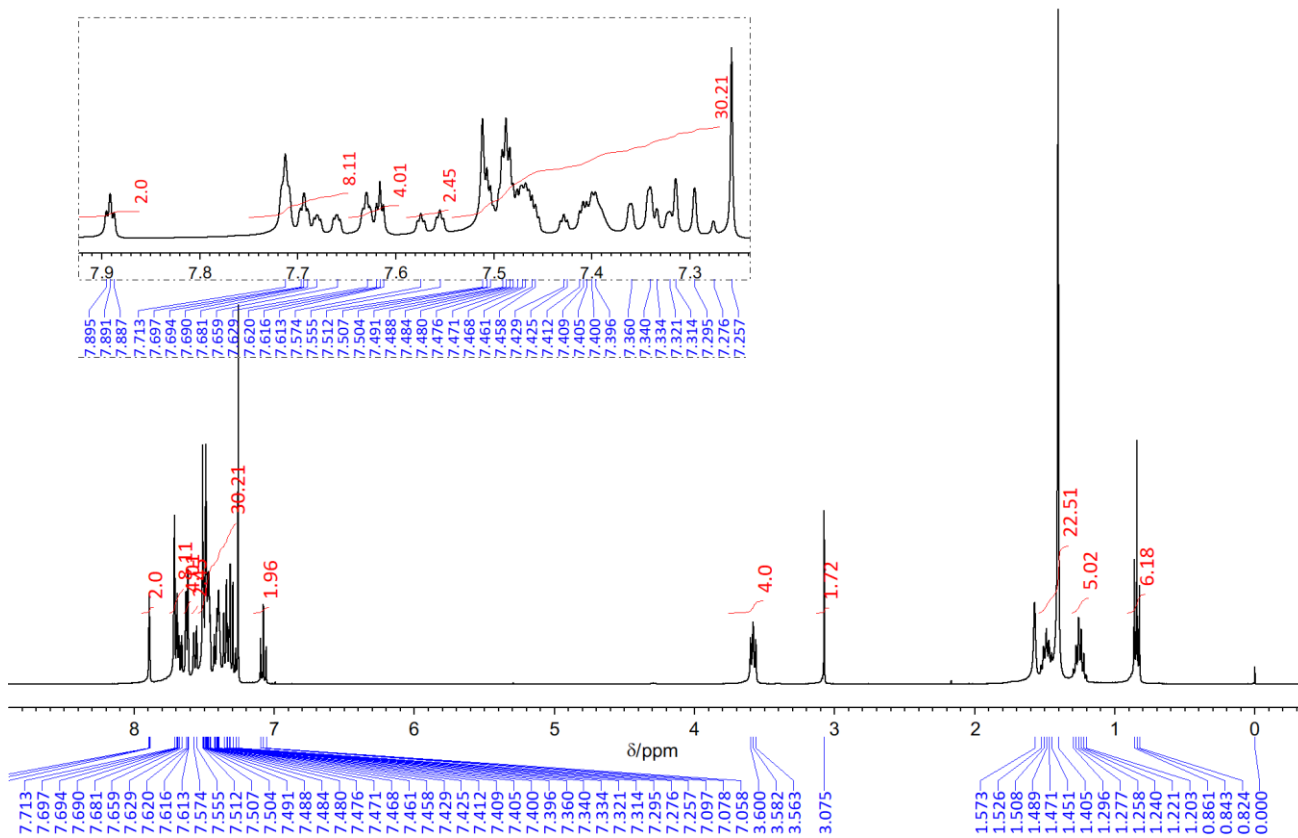

$^1\text{H}$  NMR spectrum (400 MHz) of **8**, measured in chloroform- $d$  at room temperature.

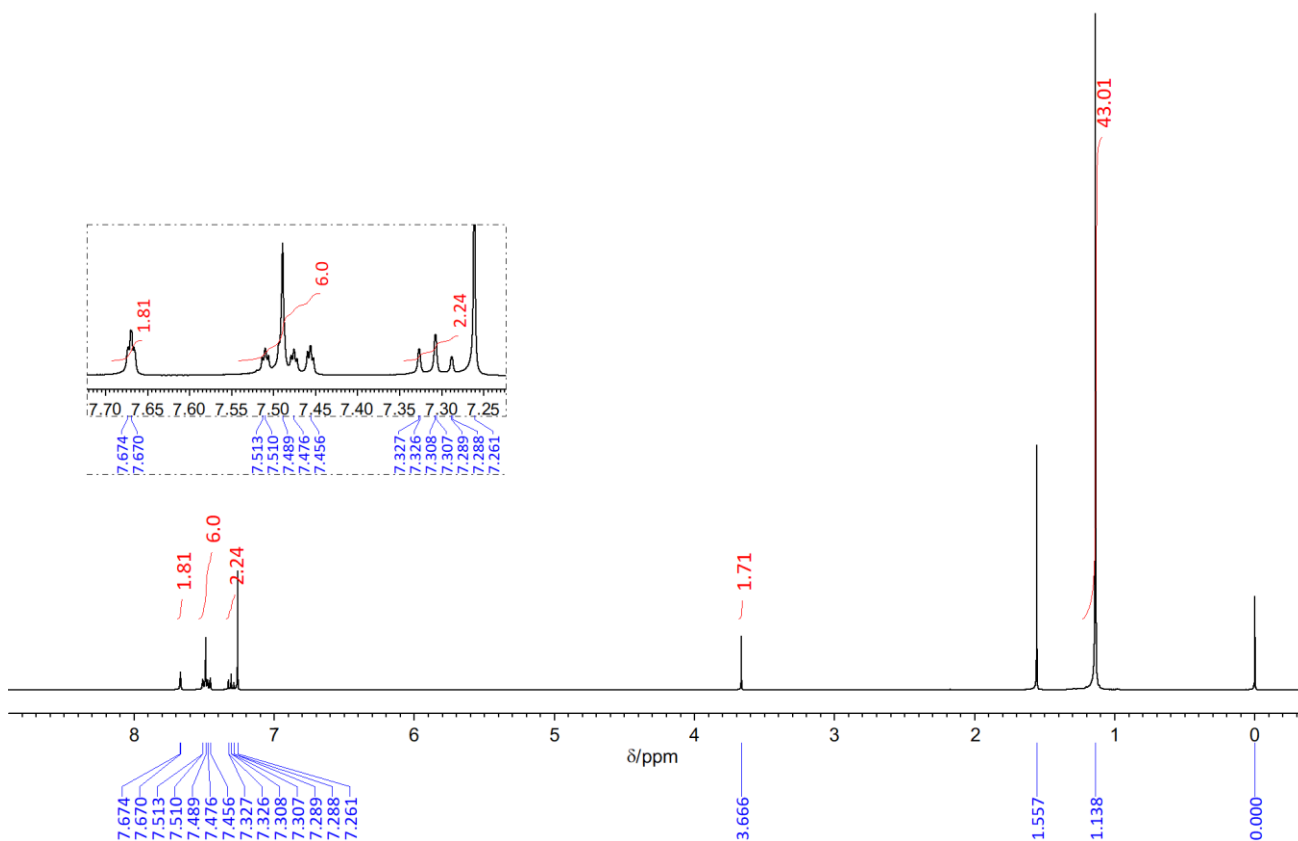

$^1\text{H}$  NMR spectrum (400 MHz) of **17'**, measured in chloroform- $d$  at room temperature.

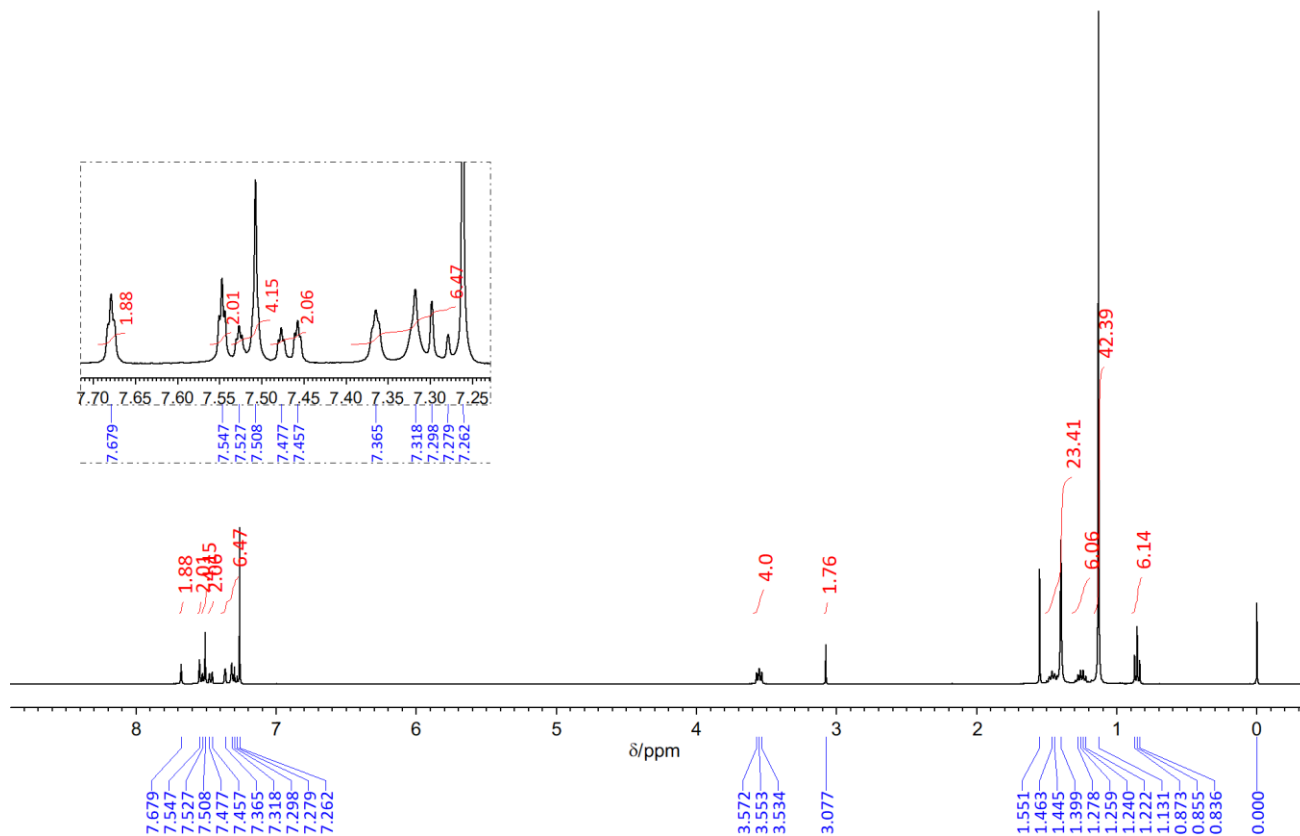

$^1\text{H}$  NMR spectrum (400 MHz) of **18'**, measured in chloroform-*d* at room temperature.

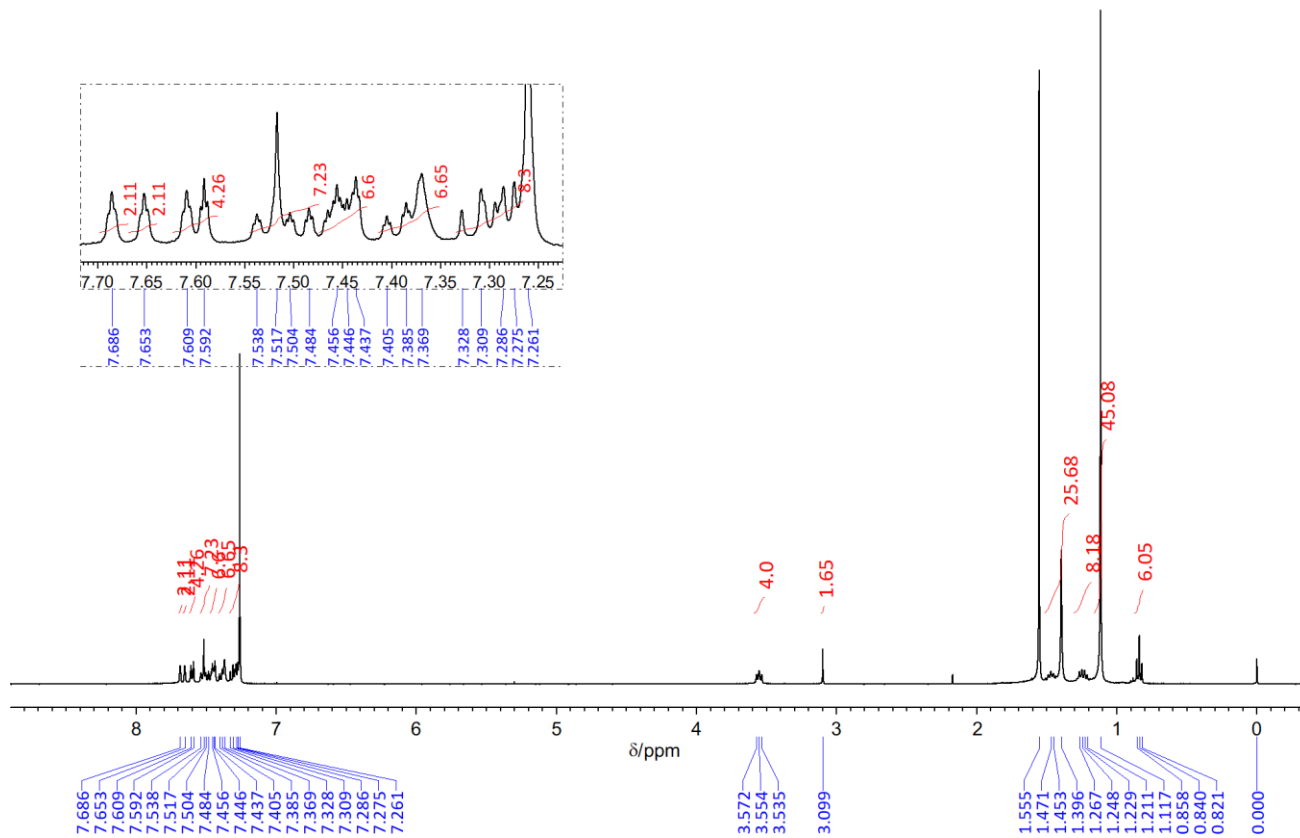

$^1\text{H}$  NMR spectrum (400 MHz) of **25'**, measured in chloroform-*d* at room temperature.

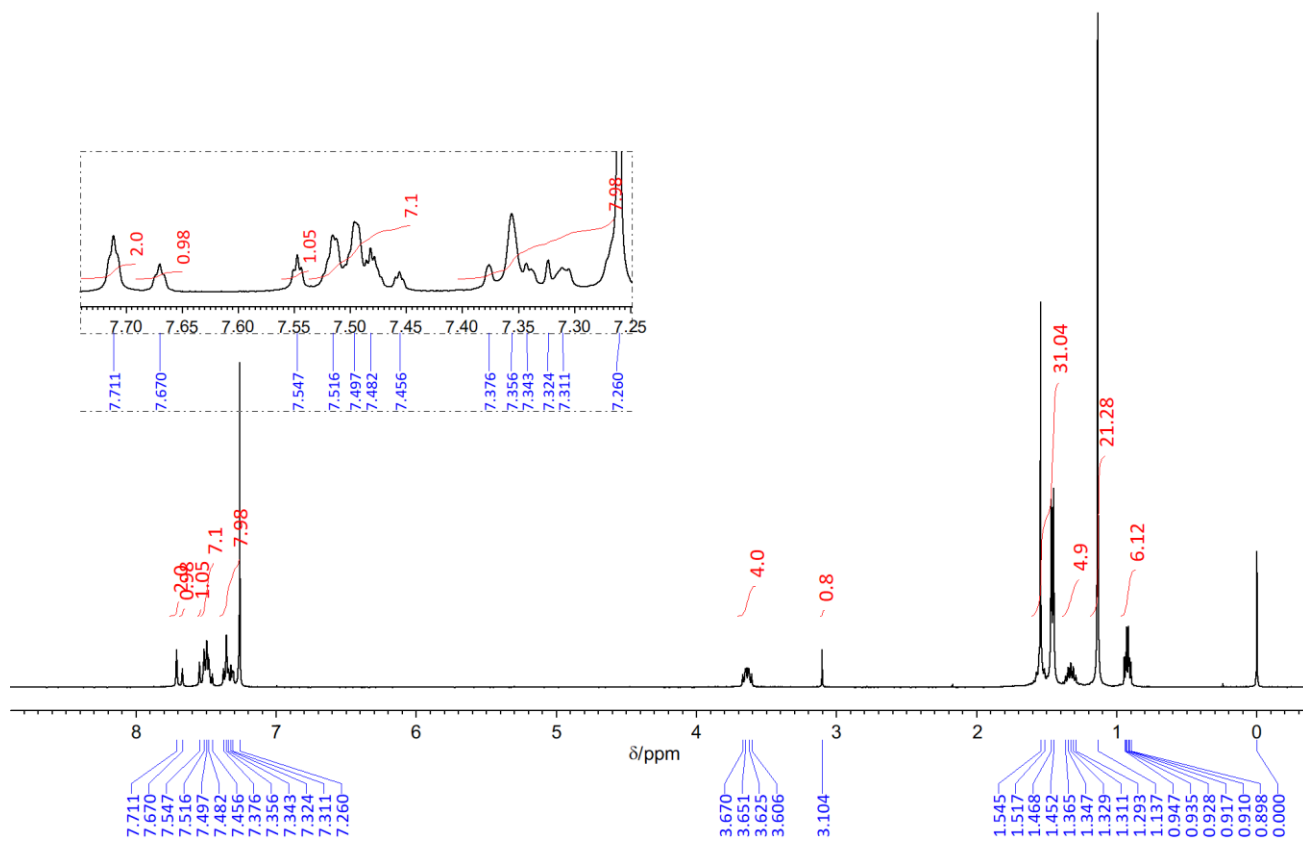

$^1\text{H}$  NMR spectrum (400 MHz) of **29'**, measured in chloroform-*d* at room temperature.

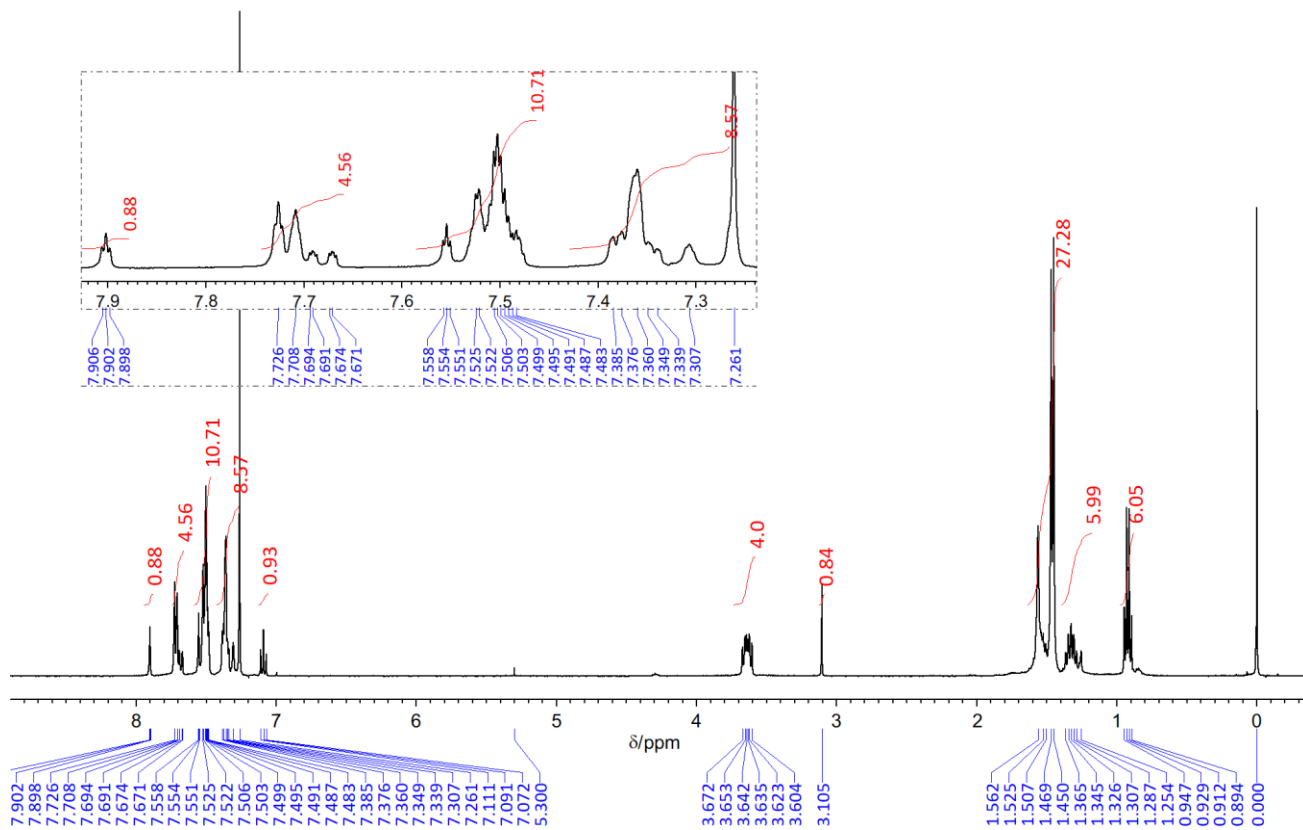

$^1\text{H}$  NMR spectrum (400 MHz) of **30'**, measured in chloroform-*d* at room temperature.



Data Name: common/Mar26:a230203-  
Sample: 3396 Katono / 9PAM-rac  
Experiment Date/Time: 2021/03/26 15:05:51

Instrument:JMST-100GCV, Ionization Mode: 1:FD+  
Acquired m/z Range: 40..3200  
Spectrum Time Range: Average(MS[1] Time:0.42)

MS Tune Method Name: FD  
GC:Agilent7890A ,Method: -  
Detector Volt: 2400[V]

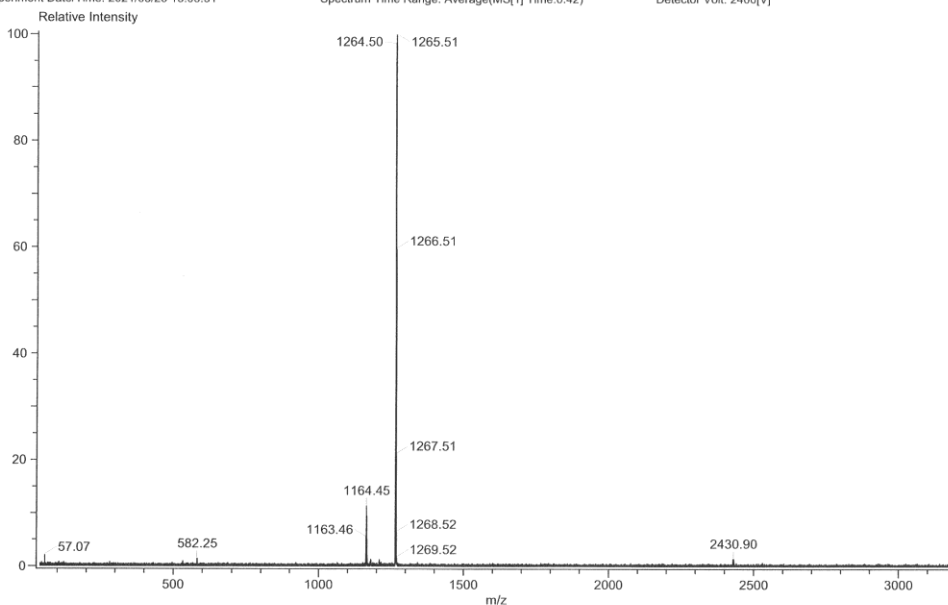

LR-MS (FD) spectrum of *rac*-3 (9PAM).

Data Name: common/Mar26:a230205-  
Sample: 3396 Katono / 11PAM-rac  
Experiment Date/Time: 2021/03/26 15:31:59

Instrument:JMST-100GCV, Ionization Mode: 1:FD+  
Acquired m/z Range: 40..3200  
Spectrum Time Range: Average(MS[1] Time:0.23)

MS Tune Method Name: FD  
GC:Agilent7890A ,Method: -  
Detector Volt: 2500[V]

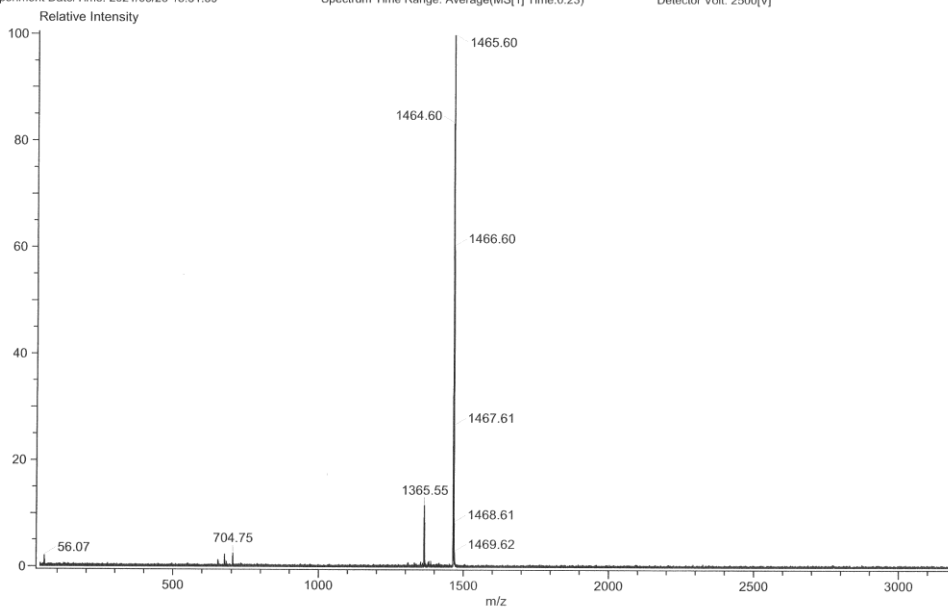

LR-MS (FD) spectrum of *rac*-4 (11PAM).

Data Name: common/Mar26\_a230204-  
Sample: 3396 Katono / 11PAM-ortho  
Experiment Date/Time: 2021/03/26 15:27:09

Instrument:JMST-100GCV, Ionization Mode: 1:FD+  
Acquired m/z Range: 40..3200  
Spectrum Time Range: Average(MS[1] Time:0.89)

MS Tune Method Name: FD  
GC:Agilent7800A ,Method: -  
Detector Volt: 2500[V]

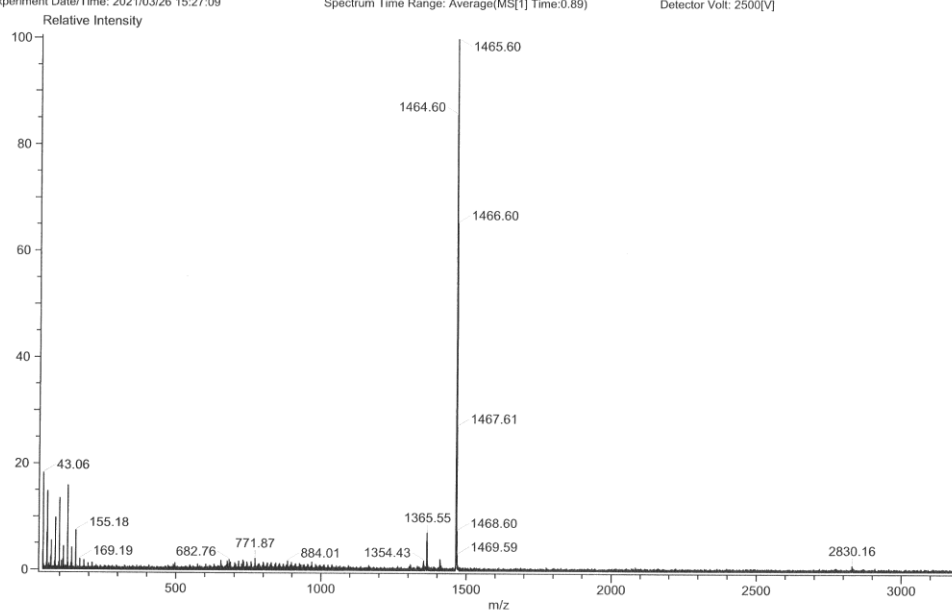

LR-MS (FD) spectrum of **10** (11PAM).

Data Name: common/Mar26\_a230207-  
Sample: 3396 Katono / 13PAM-rac  
Experiment Date/Time: 2021/03/26 15:22:27

Instrument:JMST-100GCV, Ionization Mode: 1:FD+  
Acquired m/z Range: 40..3200  
Spectrum Time Range: Average(MS[1] Time:0.21)

MS Tune Method Name: FD  
GC:Agilent7890A ,Method: -  
Detector Volt: 2400[V]

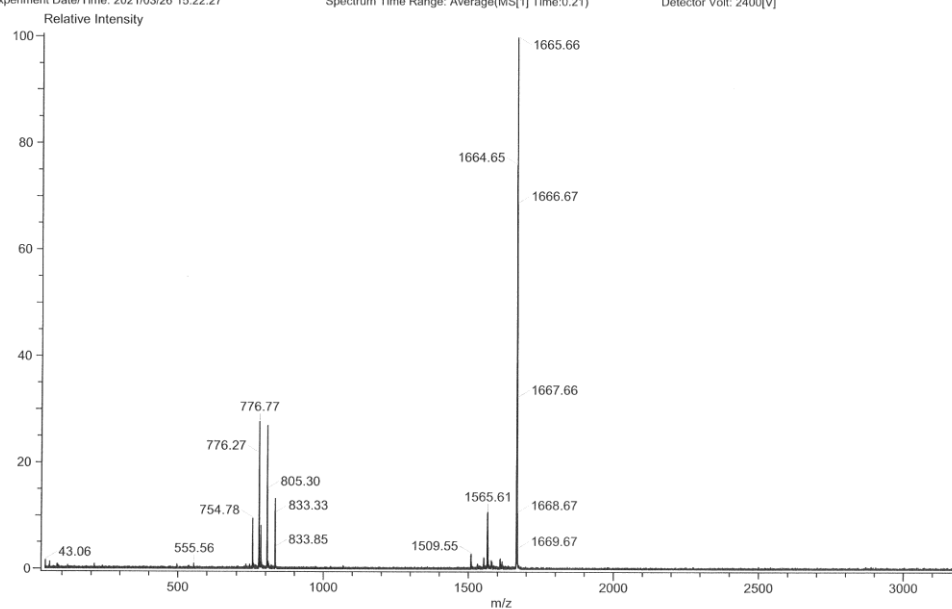

LR-MS (FD) spectrum of *rac*-**5** (13PAM).

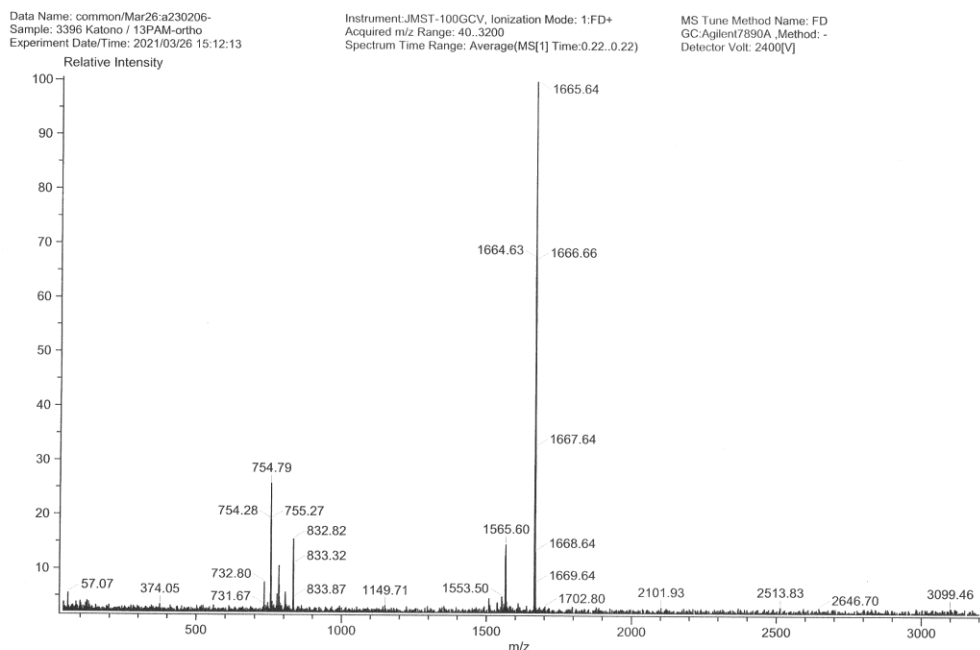

LR-MS (FD) spectrum of **11** (13PAM).

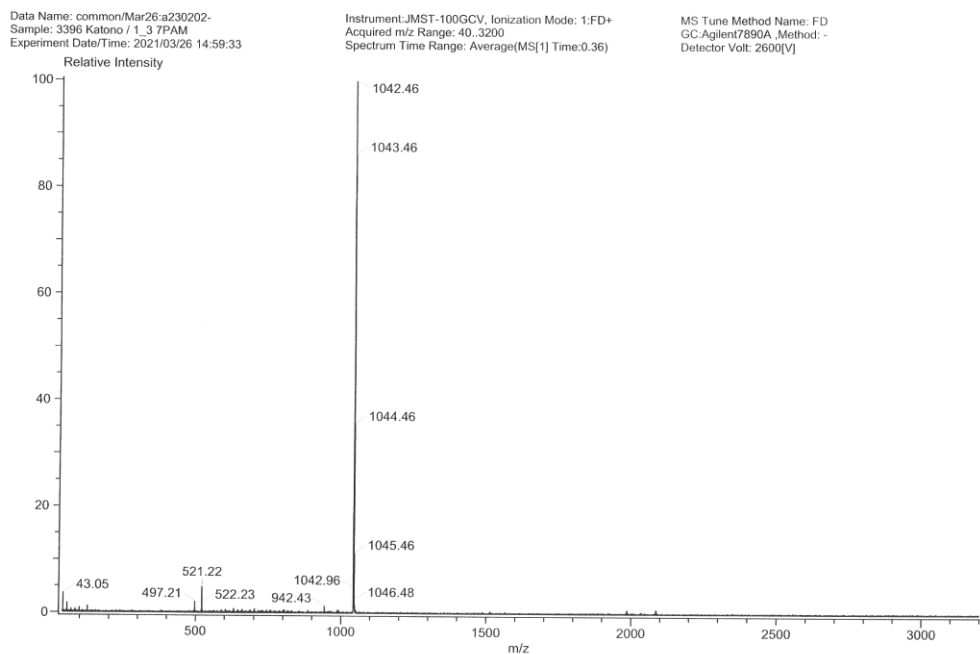

LR-MS (FD) spectrum of **14** (7PAM).

Data Name: common/Nov29:a10518-  
Sample: 2713 Arisawa / KA146  
Experiment Date/Time: 2019/11/29 14:14:52

Instrument:JMST-100GCV, Ionization Mode: 1:FD+  
Acquired m/z Range: 20..1600  
Spectrum Time Range: Average(MS[1] Time:0.77)

MS Tune Method Name: FD  
GC:Agilent7890A ,Method: -  
Detector Volt: 2300[V]

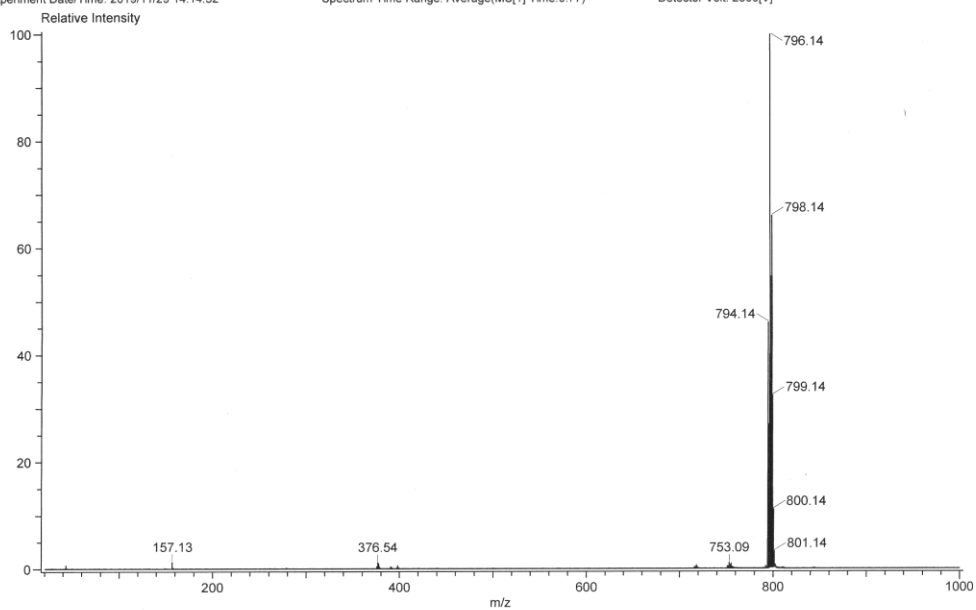

LR-MS (FD) spectrum of 16.

Data Name: common/Nov25:a10513-  
Sample: 2713 Arisawa / KA151  
Experiment Date/Time: 2019/11/25 12:51:22

Instrument:JMST-100GCV, Ionization Mode: 1:FD+  
Acquired m/z Range: 20..3200  
Spectrum Time Range: Average(MS[1] Time:0.83)

MS Tune Method Name: FD  
GC:Agilent7890A ,Method: -  
Detector Volt: 2300[V]

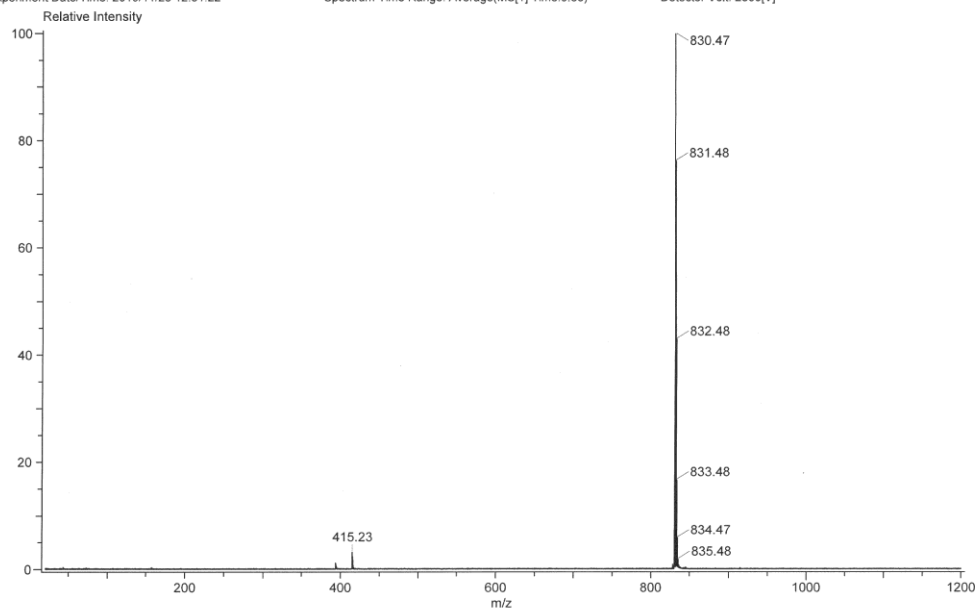

LR-MS (FD) spectrum of 17.

Data Name: common/Jan09:a10603-  
Sample: 2713 Arisawa / KA107  
Experiment Date/Time: 2020/01/09 10:09:04

Instrument:JMST-100GCV, Ionization Mode: 1:FD+  
Acquired m/z Range: 20..3200  
Spectrum Time Range: Average(MS[1] Time:0.39)

MS Tune Method Name: FD  
GC:Agilent7890A, Method: -  
Detector Volt: 2200[V]

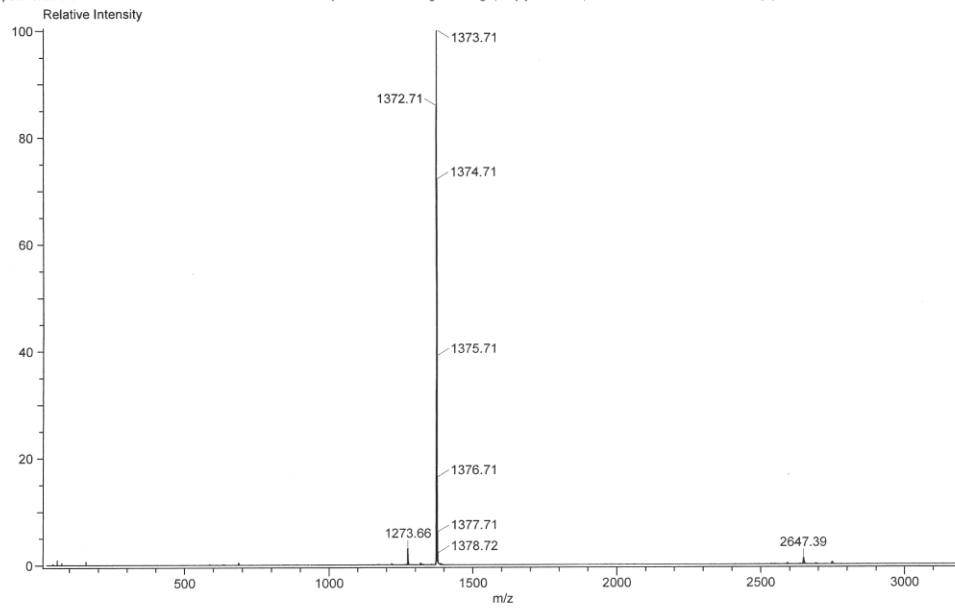

LR-MS (FD) spectrum of **18**.

Data Name: common/Mar26:a230208-  
Sample: 3396 Katono / 99  
Experiment Date/Time: 2021/03/26 15:35:12

Instrument:JMST-100GCV, Ionization Mode: 1:FD+  
Acquired m/z Range: 40..3200  
Spectrum Time Range: Average(MS[1] Time:0.15)

MS Tune Method Name: FD  
GC:Agilent7890A, Method: -  
Detector Volt: 2500[V]

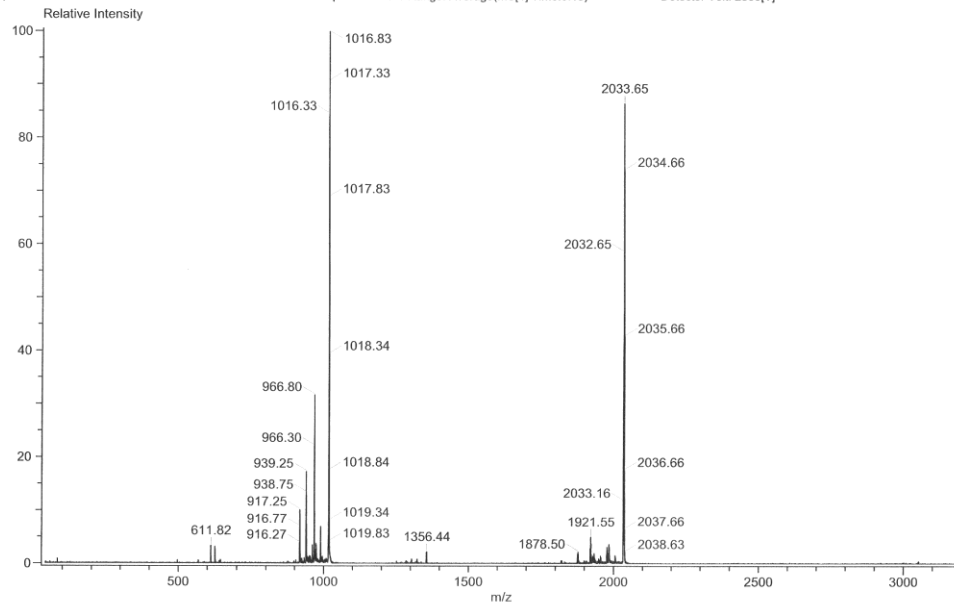

LR-MS (FD) spectrum of **19**.

Data Name: common/Jan17:a10621-  
Sample: 2713 Arisawa / KA150  
Experiment Date/Time: 2020/01/17 15:57:39

Instrument:JMST-100GCV, Ionization Mode: 1:FD+  
Acquired m/z Range: 20..1600  
Spectrum Time Range: Average(MS[1] Time:0.88)

MS Tune Method Name: FD  
GC:Agilent7890A ,Method: -  
Detector Volt: 2300[V]

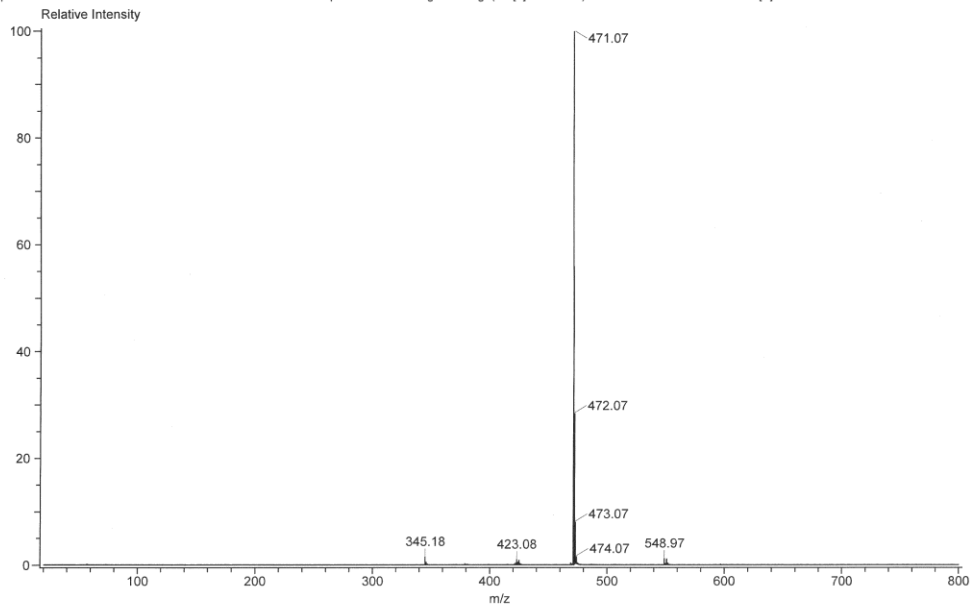

LR-MS (FD) spectrum of 21.

Data Name: common/Mar26:a230209-  
Sample: 3396 Katono / 110  
Experiment Date/Time: 2021/03/26 15:40:37

Instrument:JMST-100GCV, Ionization Mode: 1:FD+  
Acquired m/z Range: 40..3200  
Spectrum Time Range: Average(MS[1] Time:0.20)

MS Tune Method Name: FD  
GC:Agilent7890A ,Method: -  
Detector Volt: 2500[V]

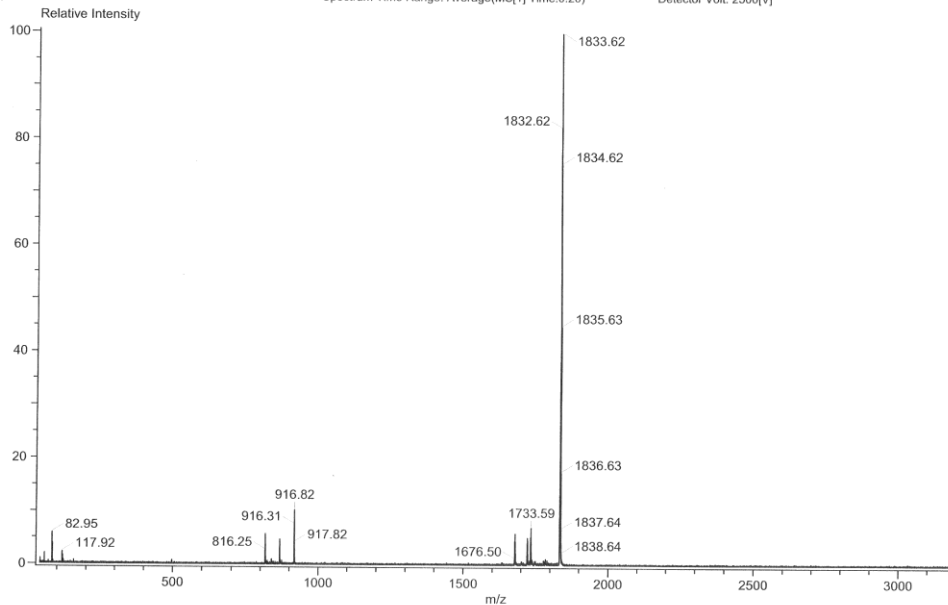

LR-MS (FD) spectrum of 24.

Data Name: common/Mar26-a230210-  
Sample: 3396 Katono / 164  
Experiment Date/Time: 2021/03/26 15:44:59

Instrument:JMST-100GCV, Ionization Mode: 1:FD+  
Acquired m/z Range: 40..3200  
Spectrum Time Range: Average(MS[1] Time:0.18)

MS Tune Method Name: FD  
GC:Agilent7890A,Method:-  
Detector Volt: 2500[V]

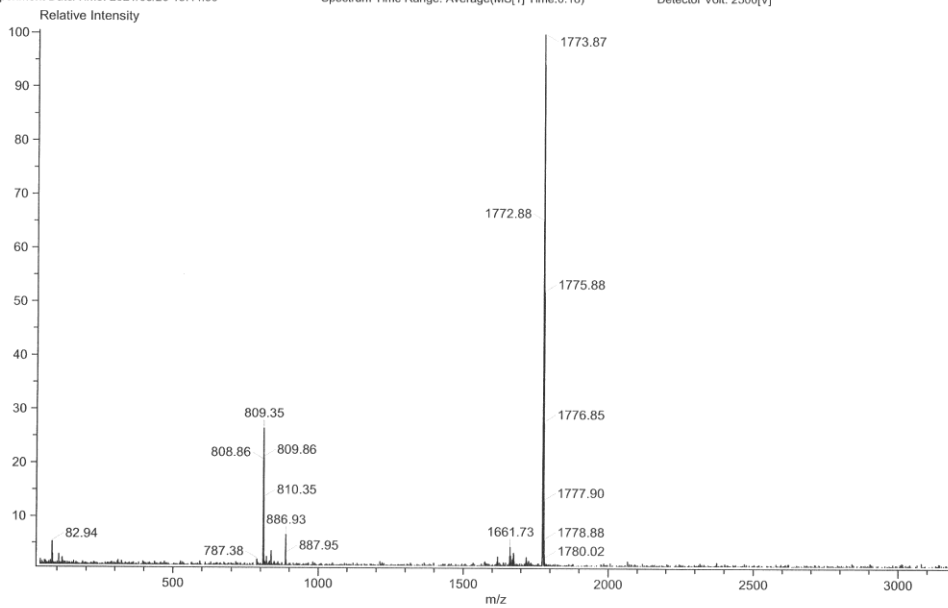

LR-MS (FD) spectrum of 25.

Data Name: common/Mar26-a230211-3  
Sample: 3396 Katono / 166  
Experiment Date/Time: 2021/03/26 15:56:31

Instrument:JMST-100GCV, Ionization Mode: 1:FD+  
Acquired m/z Range: 40..3200  
Spectrum Time Range: Average(MS[1] Time:0.10..0.23)

MS Tune Method Name: FD  
GC:Agilent7890A,Method:-  
Detector Volt: 2700[V]

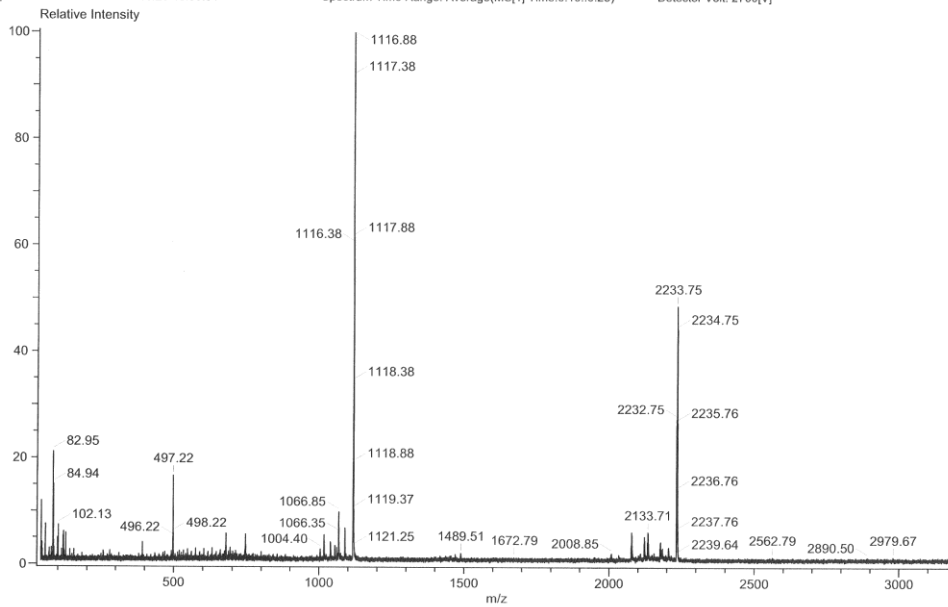

LR-MS (FD) spectrum of 26.

Data Name: common/Mar29:a230501-  
Sample: 3396 Katono / 79  
Experiment Date/Time: 2021/03/29 15:31:57

Instrument:JMST-100GCV, Ionization Mode: 1:FD+  
Acquired m/z Range: 40..3200  
Spectrum Time Range: Average(MS[1] Time:0.09)

MS Tune Method Name: FD  
GC:Agilent7890A ,Method: -  
Detector Volt: 2400[V]

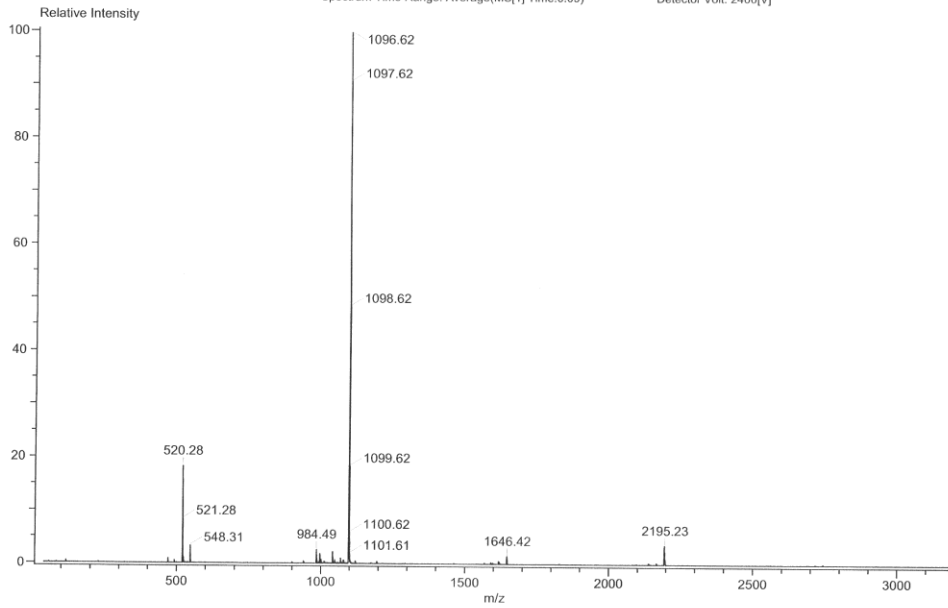

LR-MS (FD) spectrum of **29**.

Data Name: common/Mar29:a230502-  
Sample: 3396 Katono / 95  
Experiment Date/Time: 2021/03/29 15:34:47

Instrument:JMST-100GCV, Ionization Mode: 1:FD+  
Acquired m/z Range: 40..3200  
Spectrum Time Range: Average(MS[1] Time:0.12)

MS Tune Method Name: FD  
GC:Agilent7890A ,Method: -  
Detector Volt: 2400[V]

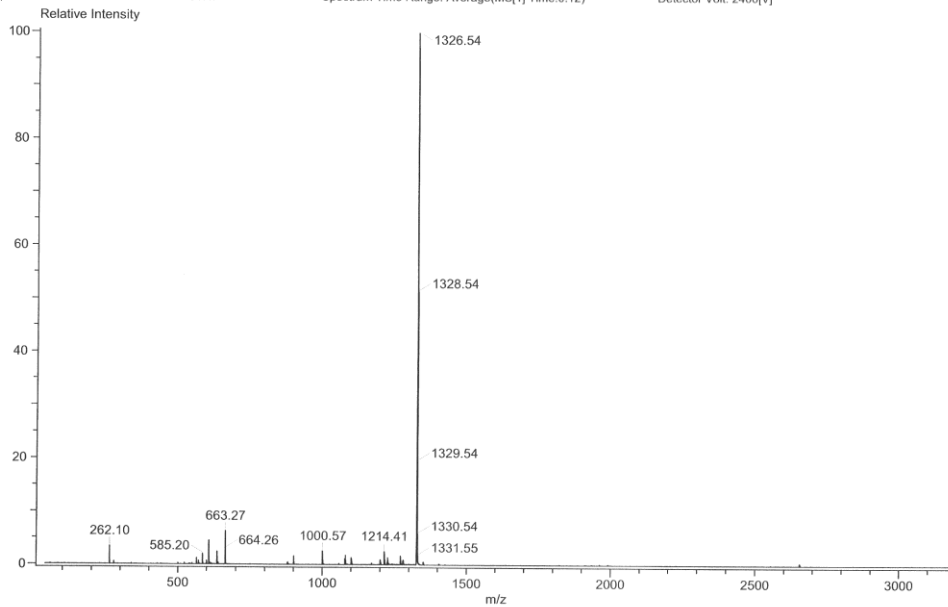

LR-MS (FD) spectrum of **30**.
